# Supplementary material for: Introduction of plumbole to f-element chemistry
Source: Royal Society of Chemistry journal article supplement (doi:10.1039/d1sc03805b), 2021-12-10
Supplement: d1sc03805b1.pdf [file d1sc03805b1.pdf]

## Supplementary Materials for

### Introduction of Plumbale to f-Element Chemistry

Luca Münzfeld,<sup>‡[a]</sup> Xiaofei Sun,<sup>‡[a]</sup> Sören Schlittenhardt,<sup>[b]</sup> Christoph Schoo,<sup>[a]</sup> Adrian Hauser,<sup>[a]</sup> Sebastian Gillhuber,<sup>[c]</sup> Florian Weigend,<sup>[d]</sup> Mario Ruben,<sup>\*[b,e,f]</sup> Peter W. Roesky<sup>\*[a]</sup>

- 
- [a] L. Münzfeld, X. Sun, Dr. C. Schoo, A. Hauser, Prof. Dr. P. W. Roesky  
Institute of Inorganic Chemistry, Karlsruhe Institute of Technology (KIT), Engesserstraße 15, D-76131 Karlsruhe, Germany.  
E-mail: roesky@kit.edu
- [b] S. Schlittenhardt, Prof. Dr. M. Ruben  
Institute of Nanotechnology, Karlsruhe Institute of Technology (KIT), Hermann-von-Helmholtz-Platz 1, D-76344 Eggenstein-Leopoldshafen, Germany.
- [c] S. Gillhuber  
Institute of Physical Chemistry, Karlsruhe Institute of Technology (KIT), Engesserstraße 15, D-76131 Karlsruhe, Germany.
- [d] Prof. Dr. F. Weigend  
Fachbereich Chemie, Philipps-Universität Marburg, Hans-Meerwein-Straße 4, D-35032 Marburg, Germany.
- [e] Prof. Dr. M. Ruben  
Centre Européen de Science Quantique (CESQ); Institut de Science et d'Ingénierie Supramoléculaires (ISIS, UMR 7006), CNRS-Université de Strasbourg, 8 allée Gaspard Monge BP 70028 67083 Strasbourg Cedex, France.
- [f] Prof. Dr. M. Ruben  
Institute of Quantum Materials and Technologies (IQMT), Karlsruhe Institute of Technology, Hermann-von-Helmholtz-Platz 1, 76344 Eggenstein-Leopoldshafen, Germany.

## Table of Contents

|                                                             |     |
|-------------------------------------------------------------|-----|
| SUPPLEMENTARY METHODS .....                                 | S3  |
| SYNTHETIC PROTOCOLS .....                                   | S5  |
| SYNTHESIS OF $[K_2(COT^{TIPS})]$ .....                      | S5  |
| NMR SPECTRA .....                                           | S14 |
| FT-RAMAN SPECTRA.....                                       | S26 |
| FT-IR SPECTRA.....                                          | S28 |
| X-RAY CRYSTALLOGRAPHIC STUDIES .....                        | S35 |
| MAGNETISM AND CALCULATIONS.....                             | S50 |
| QUANTUM CHEMICAL STUDY OF LANTHANIDE PLUMBOLE BONDING ..... | S74 |
| REFERENCES .....                                            | S99 |

## Supplementary Methods

**General Considerations:** All manipulations of air-sensitive materials were performed under rigorous exclusion of oxygen and moisture in flame-dried Schlenk-type glassware either on a dual manifold Schlenk line, interfaced to a high vacuum ( $10^{-3}$  torr) pump, or in an argon-filled *MBraun* glove box. Hydrocarbon solvents were pre-dried using an *MBraun* solvent purification system (*SPS-800*), degassed and stored *in vacuo* over  $\text{LiAlH}_4$ . Tetrahydrofuran was additionally distilled under nitrogen over potassium before storage *in vacuo* over  $\text{LiAlH}_4$ .  $\text{C}_6\text{D}_6$  and  $\text{THF-}d_8$  were dried over Na-K alloy and degassed by freeze-pump-thaw cycles.

Elemental analyses were carried out with an *Elementar Vario MICRO Cube*. NMR spectra were recorded on *Bruker* spectrometers (*Avance II* 300 MHz, *Avance* 400 MHz, or *Avance III* 400 MHz). Chemical shifts are referenced internally using signals of the residual protio solvent ( $^1\text{H}$ ) or the solvent ( $^{13}\text{C}$ ) and are reported relative to tetramethylsilane ( $^1\text{H}$ ,  $^{13}\text{C}\{^1\text{H}\}$ ), or externally relative to tetramethylsilane ( $^{29}\text{Si}$ ) or 1.0 M  $\text{LiCl}(\text{aq})$  ( $^7\text{Li}$ ). All NMR spectra were measured at 298 K, unless otherwise specified. The multiplicity of the signals is indicated as s = singlet, d = doublet, dd = doublet of doublets, t = triplet, q = quartet, m = multiplet and br = broad. Assignments were determined based on unambiguous chemical shifts, coupling patterns,  $^{13}\text{C}$ -DEPT experiments or 2D correlation experiments ( $^1\text{H}$ - $^1\text{H}$  COSY,  $^1\text{H}$ - $^{13}\text{C}$  HMQC,  $^1\text{H}$ - $^{13}\text{C}$  HMBC and  $^1\text{H}$ - $^{29}\text{Si}$  HMBC).

Infrared (IR) spectra were recorded in the region 4000–400  $\text{cm}^{-1}$  on a *Bruker Tensor 37 FTIR* spectrometer equipped with a room temperature DLaTGS detector, a diamond attenuated total reflection (ATR) unit and a nitrogen-flushed chamber. In terms of their intensity, the signals were classified into different categories (vs = very strong, s = strong, m = medium, w = weak).

Raman spectra were recorded in the region 4000–20  $\text{cm}^{-1}$  on a *Bruker MultiRam* spectrometer equipped with a Nd:YAG laser ( $\lambda = 1064$  nm) and a germanium detector at a resolution of 2  $\text{cm}^{-1}$ . The powdered crystalline sample materials were flame sealed in a glass tube. The laser energy was adjusted to values between 20 and 200 mW depending on the FID amplitude and laser focusing. In terms of their intensity, the signals were classified into different categories (vs = very strong, s = strong, m = medium, w = weak).

HR-EI-MS spectra were recorded with a *Thermo Fisher Scientific DFS–Magnetic Sector GC/MS* instrument using powdered crystalline samples.

$[\text{Ln}(\text{BH}_4)(\text{thf})_3]$  (Ln = La, Ce, Sm, Er),  $[\text{Li}_2(\text{thf})_2(\text{L}^{\text{Pb}})]$  ( $\text{L}^{\text{Pb}} = 1,4$ -bis-tert-butyl-dimethylsilyl-2,3-bis-phenyl-plumbolyl) and  $\text{H}_2\text{COT}^{\text{TIPS}}$  (TIPS = 1,4-bis-triisopropylsilyl-cyclooctatetraenyl) were prepared according to literature procedures.<sup>1,2,3</sup> All other chemicals were obtained from commercial sources and used without further purification.

**Note:** To ensure the best possible purity and reliability of all compounds, only crystalline material was isolated. Hence all yields and analytics refer to isolated crystalline samples, whereas yields are generally lower compared to bulk samples. Elemental analysis gave

reproducibly low C and H values for all compounds discussed here. In the case of compounds **1-4** this might mislead to the assumption, that the coordinated THF molecules are completely removed upon drying *in vacuo*. However, NMR experiments of the dried crystalline samples unambiguously proof that some amounts of THF-H<sub>8</sub> stemming from the dissolved compounds is still abundant. Since we could not determine the exact amount of residual THF in the samples, the theoretical values of **1-4** were calculated for the THF free species. The low C and H values are probably caused by carbide formation, e.g. caused by silicon or the lanthanide ions in **1-4**. HR-EI-MS spectra of compounds **1-4** were recorded to proof the suggested composition of the isolated crystalline material.

For compounds **5-10** a similar behavior is observed, however much less pronounced. We assume that this is caused by the lower mass percentage of the silicon and the corresponding lanthanide in complexes **5-10** compared to **1-4**, caused by the relatively high molar weight of the incorporated lead atom. This leads to C/H-values in the expected- to lower expected range.

## Synthetic protocols

### Synthesis of $[K_2(COT^{TIPS})]$

The deprotonation of  $H_2COT^{TIPS}$  was conducted in a modified procedure.<sup>3</sup> A mixture of  $H_2COT^{TIPS}$  (10.0 g, 24.0 mmol, 1.00 eq) and potassium *tert*-butoxide (5.38 g, 48.0 mmol, 2.00 eq) was suspended in 300 mL *n*-heptane. Afterwards *n*-BuLi (2.5 M in hexanes, 19.2 mL, 48.0 mmol, 2.00 eq) was added dropwise to the reaction mixture at room temperature under vigorous stirring. After complete addition, the reaction mixture turned dark red and the formation of an off-white solid was observed. The resultant suspension was stirred for 12 h at room temperature. Subsequently, precipitated  $[K_2COT^{TIPS}]$  was collected by filtration and washed with approximately 200 mL *n*-heptane until the washing solution remained colorless. After drying *in vacuo*  $[K_2COT^{TIPS}]$  was isolated as an off-white powder. Yield: 9.16 g (18.5 mmol, 77%).

<sup>1</sup>H NMR in agreement with literature.<sup>3</sup>

### Synthesis of $[Ln(\eta^8-COT^{TIPS})BH_4]$ (1-4)

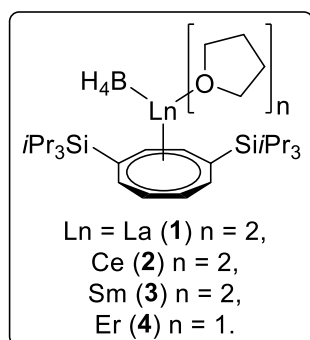

In a general procedure THF was added at  $-78^\circ\text{C}$  to a mixture of  $[K_2(COT^{TIPS})]$  (1.00 g, 2.02 mmol, 1.00 eq) and the corresponding  $[Ln(BH_4)_3(thf)_3]$  (2.02 mmol, 1.00 eq, Ln = La: 801 mg, Ce: 804mg, Sm: 825 mg, Er: 859 mg). The resulting suspension was slowly warmed to room temperature and vigorously stirred for 12 h. During this time, the reaction mixture adopted a characteristic color depending on the corresponding lanthanide ion (La: light orange, Ce: yellow-green, Sm: purple, Er: orange) and the formation of an off-white solid was observed. Afterwards all volatiles were removed *in vacuo*. The residual solid was extracted with hot toluene (40 mL) and filtered over celite on a medium porosity sintered glass frit. The filtrate was stripped to dryness and washed with *n*-pentane until the washing solution remained colorless. The remaining solids were dried under reduced pressure and dissolved in hot toluene. Subsequently the obtained saturated solutions were stored at room temperature until the formation of crystalline material was observable. After this initial crystallization the samples were stored at  $-30^\circ\text{C}$  for one week to maximize the crystalline yields. The pure compounds were then isolated as crystalline solids (La: colorless, Ce: yellow, Sm: purple, Er: pink) by decantation of the mother liquor and drying *in vacuo* for 1 h. Further concentration of the mother liquor did not yield significant amounts of additional product. Single crystals suitable for X-ray diffraction were obtained by slow evaporation of a THF solution (**1-3**) or recrystallization from hot toluene (**4**). Elemental analysis indicates removal of THF from the complexes upon drying *in vacuo* for compounds **1-4**. Thus, above depiction of compounds **1-4**

reflects their molecular structure in the solid state as determined by SCXRD, since the exact structure of the isolated solvate-free compounds was not investigated.

**[La( $\eta^8$ -COT<sup>TIPS</sup>)BH<sub>4</sub>] (1):** Yield: 1.02 g (1.79 mmol), 89%. Anal. Calcd for C<sub>26</sub>H<sub>52</sub>BSi<sub>2</sub>La (570.59): C, 54.73; H, 9.19. Found: C, 54.77; H, 8.93. **HR-EI - MS:** (70 eV, QT = 180 °C): m/z [%] = 570.274 [M]<sup>+</sup> (25.75), 555.234 [M-BH<sub>4</sub>]<sup>+</sup> (14.49); 513.185 [M-BH<sub>4</sub>-C<sub>3</sub>H<sub>6</sub>]<sup>+</sup> (100). **<sup>1</sup>H NMR** (400.30 MHz, THF-*d*<sub>8</sub>):  $\delta$  [ppm]: 6.77 (s, 2H, CH<sub>COT</sub>); 6.66-6.59 (m, 2H, CH<sub>COT</sub>); 6.55-6.49 (m, 2H, CH<sub>COT</sub>); 3.64-3.60 (m, 4H, CH<sub>2</sub><sup>thf</sup>); 1.79-1.75 (m, 4H, CH<sub>2</sub><sup>thf</sup>); 1.63 (sept, <sup>3</sup>J<sub>HH</sub> = 7.5 Hz, 6H, Si(CH(CH<sub>3</sub>)<sub>2</sub>)<sub>3</sub>); 1.21, 1.17 (two sets of d, <sup>3</sup>J<sub>HH</sub> = 7.5 Hz, 36H, Si(CH(CH<sub>3</sub>)<sub>2</sub>)<sub>3</sub>); 0.20 (br q, <sup>1</sup>J<sub>HB</sub> = 85 Hz, 4H, BH<sub>4</sub>). **<sup>11</sup>B NMR** (128.43 MHz, THF-*d*<sub>8</sub>):  $\delta$  [ppm]: -26.6 (q, <sup>1</sup>J<sub>HB</sub> = 85 Hz, BH<sub>4</sub>). **<sup>13</sup>C{<sup>1</sup>H} NMR** (100.67 MHz, THF-*d*<sub>8</sub>):  $\delta$  [ppm]: 106.8 (C<sub>COT</sub>); 104.6 (C<sub>COT</sub>); 101.3 (C<sub>COT</sub>); 99.3 (C<sub>COT</sub>); 68.4 (C<sup>thf</sup>); 26.5 (C<sup>thf</sup>); 20.0 (Si(CH(CH<sub>3</sub>)<sub>2</sub>)<sub>3</sub>); 13.4 (Si(CH(CH<sub>3</sub>)<sub>2</sub>)<sub>3</sub>). **<sup>29</sup>Si{<sup>1</sup>H} NMR** (79.52 MHz, THF-*d*<sub>8</sub>):  $\delta$  [ppm]: 6.7 (Si/Pr<sub>3</sub>). **Raman:**  $\tilde{\nu}$  [cm<sup>-1</sup>] = 3056 (w), 3014 (w), 2972 (m), 2943 (m), 2865 (vs), 2750 (w), 2708 (w), 2388 (w), 2329 (w), 2242 (w), 2165 (w), 1532 (w), 1493 (m), 1473 (m), 1445 (w), 1369 (w), 1343 (w), 1297 (w), 1252 (w), 1234 (w), 1159 (w), 1072 (w), 1035 (w), 1015 (w), 1003 (w), 971 (w), 926 (w), 883 (m), 812 (w), 787 (w), 754 (s), 738 (w), 670 (w), 640 (w), 609 (w), 571 (w), 517 (m), 454 (m), 422 (w), 388 (w), 362 (w), 316 (w), 256 (m), 238 (m), 178 (w), 100 (m), 67 (m). **IR (ATR):**  $\tilde{\nu}$  (cm<sup>-1</sup>) = 2941 (vs), 2889 (vs), 2863 (vs), 2413 (w), 2242 (w), 1462 (s), 1380 (w), 1367 (w), 1343 (w), 1250 (w), 1212 (w), 1135 (w), 1070 (m), 1031 (m), 1012 (s), 957 (w), 931 (m), 881 (s), 834 (w), 792 (m), 735 (m), 667 (m), 637 (s), 607 (w), 583 (m), 525 (w), 465 (w).

**[Ce( $\eta^8$ -COT<sup>TIPS</sup>)BH<sub>4</sub>] (2):** Yield: 809 mg (1.41 mmol), 70%, Anal. Calcd for C<sub>26</sub>H<sub>52</sub>BSi<sub>2</sub>Ce (571.80): C, 54.61; H, 9.17. Found: C, 53.68; H, 8.65. **HR-EI - MS:** (70 eV, QT = 250 °C): m/z [%] = 571.216 [M]<sup>+</sup> (27.14), 556.178 [M-BH<sub>4</sub>]<sup>+</sup> (14.49); 514.110 [M-BH<sub>4</sub>-C<sub>3</sub>H<sub>6</sub>]<sup>+</sup> (100). **<sup>1</sup>H NMR** (300.13 MHz, THF-*d*<sub>8</sub>):  $\delta$  [ppm]: 25.82 (br s, 4H, BH<sub>4</sub>); 11.23 (br s, 2H, CH<sub>COT</sub>); 7.21 (br s, 2H, CH<sub>COT</sub>); 3.64-3.60 (m, CH<sub>2</sub><sup>thf</sup>); 1.79-1.75 (m, CH<sub>2</sub><sup>thf</sup>); 1.36 (br s, 6H, Si(CH(CH<sub>3</sub>)<sub>2</sub>)<sub>3</sub>); 1.04 (d, <sup>3</sup>J<sub>HH</sub> = 5.7 Hz, 18H; Si(CH(CH<sub>3</sub>)<sub>2</sub>)<sub>3</sub>); 0.17 (d, <sup>3</sup>J<sub>HH</sub> = 5.7 Hz, 18H; Si(CH(CH<sub>3</sub>)<sub>2</sub>)<sub>3</sub>); -5.86 (br s, 2H, CH<sub>COT</sub>). **<sup>13</sup>C{<sup>1</sup>H} NMR** (75.48 MHz, THF-*d*<sub>8</sub>):  $\delta$  [ppm]: 136.8 (C<sub>COT</sub>); 117.6 (C<sub>COT</sub>); 108.4 (C<sub>COT</sub>); 108.2 (C<sub>COT</sub>); 68.4 (C<sup>thf</sup>); 26.6 (C<sup>thf</sup>); 19.4 (Si(CH(CH<sub>3</sub>)<sub>2</sub>)<sub>3</sub>); 18.5 (Si(CH(CH<sub>3</sub>)<sub>2</sub>)<sub>3</sub>); 13.8 (Si(CH(CH<sub>3</sub>)<sub>2</sub>)<sub>3</sub>). **<sup>29</sup>Si{<sup>1</sup>H} NMR** (59.63 MHz, THF-*d*<sub>8</sub>):  $\delta$  [ppm]: -3.0 (Si/Pr<sub>3</sub>). **<sup>11</sup>B NMR** (96.29 MHz, THF-*d*<sub>8</sub>):  $\delta$  [ppm]: 17.8 (br, BH<sub>4</sub>). **Raman:**  $\tilde{\nu}$  (cm<sup>-1</sup>) = 3037 (w), 3006 (w), 2942 (m), 2864 (vs), 2752 (w), 2710 (w), 2428 (w), 2308 (w), 2240 (m), 2160 (m), 2132 (w), 2113 (w), 1532 (m), 1490 (w), 1470 (w), 1447 (w), 1383 (w), 1295 (w), 1232 (w), 1158 (w), 1074 (w), 1017 (w), 996 (w), 971 (w), 920 (s), 883 (m), 825 (w), 755 (s), 668 (w), 643 (w), 610 (w), 558 (w), 516 (w), 452 (m), 363 (w), 280 (m), 249 (m), 97 (s). **IR (ATR):**  $\tilde{\nu}$  (cm<sup>-1</sup>) = 2998 (w), 2942 (vs), 2889 (s), 2864 (vs), 2428 (w), 2241 (w), 1581 (w), 1462 (m), 1385 (w), 1364 (w), 1306 (m), 1236 (vs), 1207 (s), 1147 (s), 1035 (m), 985 (s), 922 (w), 882 (s), 855 (w), 822 (w), 746 (m), 666 (s), 642 (s), 581 (w); 516 (w).

**[Sm( $\eta^8$ -COT<sup>TIPS</sup>)BH<sub>4</sub>] (3):** Yield: 856 mg (1.47 mmol) 73% Anal. Calcd for C<sub>26</sub>H<sub>52</sub>BSi<sub>2</sub>Sm (582.04): C, 53.65; H, 9.01. Found: C, 53.61; H, 8.46. **HR-EI - MS:** (70 eV, QT = 250 °C): m/z

[%] = 583.189 [M]<sup>+</sup> (8.00), 568.154 [M-BH<sub>4</sub>]<sup>+</sup> (3.59); 526.124 [M-BH<sub>4</sub>-C<sub>3</sub>H<sub>6</sub>]<sup>+</sup> (8.98). **<sup>1</sup>H NMR** (300.13 MHz, THF-*d*<sub>8</sub>): δ [ppm]: 13.11 (br s, 2H, CH<sub>COT</sub>); 12.12 (br s, 2H, CH<sub>COT</sub>); 10.56 (br s, 2H, CH<sub>COT</sub>); 3.64-3.59 (m, CH<sub>2</sub><sup>thf</sup>); 2.37 (sept, 6H, <sup>3</sup>J<sub>HH</sub> = 7.4 Hz, Si(CH(CH<sub>3</sub>)<sub>2</sub>)<sub>3</sub>); 1.86 (d, <sup>3</sup>J<sub>HH</sub> = 7.4 Hz, 18H; Si(CH(CH<sub>3</sub>)<sub>2</sub>)<sub>3</sub>); 1.79-1.75 (m, CH<sub>2</sub><sup>thf</sup>); 1.68 (d, <sup>3</sup>J<sub>HH</sub> = 7.5 Hz, 18H, Si(CH(CH<sub>3</sub>)<sub>2</sub>)<sub>3</sub>); -21.71 (br, 4H, BH<sub>4</sub>). **<sup>13</sup>C{<sup>1</sup>H} NMR** (75.47 MHz, THF-*d*<sub>8</sub>): δ [ppm]: 87.7 (C<sub>COT</sub>); 84.9 (C<sub>COT</sub>); 83.1 (C<sub>COT</sub>); 77.4 (C<sub>COT</sub>); 68.4 (C<sup>thf</sup>); 26.5 (C<sup>thf</sup>); 20.4 (Si(CH(CH<sub>3</sub>)<sub>2</sub>)<sub>3</sub>); 12.1 (Si(CH(CH<sub>3</sub>)<sub>2</sub>)<sub>3</sub>). **<sup>29</sup>Si{<sup>1</sup>H} NMR** (59.63 MHz, THF-*d*<sub>8</sub>): δ [ppm]: 22.3 (SiPr<sub>3</sub>). **<sup>11</sup>B NMR** (96.29 MHz, THF-*d*<sub>8</sub>): δ [ppm]: -64.6 (s, BH<sub>4</sub>). **Raman**:  $\tilde{\nu}$  (cm<sup>-1</sup>) = 3030 (w), 3003 (w), 2924 (m), 2865 (vs), 2754 (w), 2712 (w), 2437 (w), 2330 (w), 2241 (w), 2197 (w), 2159 (w), 2132 (w), 1491 (m), 1470 (w), 1447 (w), 1293 (w), 1234 (w), 1157 (w), 1072 (w), 1017 (w), 993 (w), 970 (w), 921 (s), 882 (m), 819 (m), 756 (s), 670 (w), 639 (w), 605 (w), 562 (w), 518 (m), 452 (m), 364 (m), 279 (m), 235 (s), 181 (m), 108 (s), 97 (s). **IR (ATR)**:  $\tilde{\nu}$  (cm<sup>-1</sup>) = 3018 (s), 2942 (vs), 2888 (s), 2863 (vs), 2430 (m), 2257 (m), 1462 (s), 1380 (w), 1287 (w), 1250 (w), 1216 (w), 1100 (w), 1071 (w), 1031 (m), 1011 (m), 959 (w), 934 (m), 881 (m), 858 (w), 833 (w), 802 (w), 742 (m), 668 (m), 637 (s), 609 (w), 584 (m), 526 (w), 464 (w).

**[Er( $\eta^8$ -COT<sup>TIPS</sup>)BH<sub>4</sub>] (4)**: Due to the strong paramagnetic behavior of **4**, not all expected resonances could be observed in the <sup>1</sup>H-NMR spectrum. Additionally, the resonance assignment could not be performed unambiguously. Moreover, the <sup>13</sup>C-NMR remained silent. Yield: 703 mg (1.17 mmol) 58% Anal. Calcd for C<sub>26</sub>H<sub>52</sub>BSi<sub>2</sub>Er (598.94): C, 52.14; H, 8.75. Found: C, 52.31; H, 8.62. **HR-EI-MS**: (70 eV, QT = 200°C): m/z [%] = 597.297 [M+H]<sup>+</sup> (21.27), 582.250 [M-BH<sub>4</sub>]<sup>+</sup> (3.78); 540.182 [M-BH<sub>4</sub>-C<sub>3</sub>H<sub>6</sub>]<sup>+</sup> (86.19). **<sup>1</sup>H NMR** (300.12 MHz, THF-*d*<sub>8</sub>): δ [ppm]: 3.60 (s, CH<sub>2</sub><sup>thf</sup>); 1.80 (s, CH<sub>2</sub><sup>thf</sup>); 0.98 (m, CH<sub>COT</sub> or BH<sub>4</sub>); -16.30 (s, 18H, Si(CH(CH<sub>3</sub>)<sub>2</sub>)<sub>3</sub>); -18.73 (s, 18H, Si(CH(CH<sub>3</sub>)<sub>2</sub>)<sub>3</sub>); -28.06 (s, 6H, Si(CH(CH<sub>3</sub>)<sub>2</sub>)<sub>3</sub>); -51.79 (br s, CH<sub>COT</sub> or BH<sub>4</sub>); -61.28 (br s, CH<sub>COT</sub> or BH<sub>4</sub>). **<sup>29</sup>Si{<sup>1</sup>H} NMR** (59.63 MHz, THF-*d*<sub>8</sub>): δ [ppm]: 59.0 (SiPr<sub>3</sub>). **<sup>11</sup>B NMR** (96.29 MHz, THF-*d*<sub>8</sub>): δ [ppm]: -193.5 (br s, BH<sub>4</sub>). **Raman**:  $\tilde{\nu}$  (cm<sup>-1</sup>) = 3043 (w), 3027 (w), 2997 (m), 2943 (s), 2888 (m), 2861 (vs), 2772 (w), 2750 (w), 2708 (w), 2467 (m), 2372 (w), 2241 (w), 2201 (w), 2136 (w), 1524 (w), 1485 (m), 1470 (m), 1445 (m), 1381 (w), 1367 (w), 1295 (w), 1250 (w), 1231 (w), 1156 (w), 1073 (w), 1043 (w), 1015 (w), 997 (w), 969 (w), 928 (w), 880 (s), 823 (w), 777 (w), 760 (m), 669 (w), 646 (w), 606 (w), 570 (w), 517 (m), 454 (m), 421 (w), 390 (w), 363 (w), 315 (m), 277 (m), 243 (s), 210 (w), 165 (m), 116 (s), 75 (s). **IR (ATR)**:  $\tilde{\nu}$  (cm<sup>-1</sup>) = 2998 (w), 2940 (vs), 2921 (vs), 2888 (s), 2862 (vs), 2465 (m), 2240 (w), 2202 (w), 2136 (m), 1462 (s), 1383 (w), 1366 (w), 1251 (w), 1211 (w), 1186 (m), 1071 (w), 1037 (m), 1014 (s), 993 (w), 931 (m), 880 (m), 859 (w), 752 (m), 667 (m), 641 (s), 604 (w), 580 (m), 525 (m), 478 (w).

### Synthesis of $[\text{Li}(\text{thf})(\eta^5\text{-L}^{\text{Pb}})\text{La}(\eta^8\text{-COT}^{\text{TIPS}})]$ (**5**)

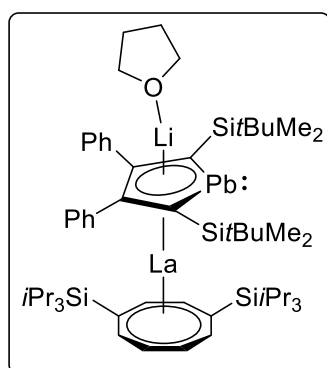

To a mixture of  $[\text{Li}_2(\text{thf})_2(\text{L}^{\text{Pb}})]$  (120 mg, 0.150 mmol, 1.00 eq) and **1** (86 mg, 0.150 mmol, 1.00 eq) was condensed THF (10 mL) at  $-88\text{ }^\circ\text{C}$ . The resulting brownish-red solution was slowly warmed up to room temperature and stirred 12 h at room temperature, during which time the solution became orange-brown. All volatiles were removed under reduced pressure and the solid residue was extracted with hot *n*-heptane (10 mL). Subsequently, the *n*-heptane extract was concentrated until the formation of a brown solid was observed. The resulting suspension was gently

heated until all solids were redissolved and storage of the saturated solution at room temperature for 12 h led to the formation of single crystals suitable for X-ray diffraction. After removing approximately 5 mg of crystals for SCXRD experiments, each batch was further stored at  $-10\text{ }^\circ\text{C}$  for one week to induce crystallization of the residual product. Separation from the mother liquor and drying *in vacuo* for 1 h gave **5** as orange-green crystalline material.

Yield (based on crystals): 103 mg (0.081 mmol), 54%. Anal. Calcd for  $\text{C}_{58}\text{H}_{96}\text{LiOSi}_4\text{LaPb}$  (1274.79): C, 54.65; H, 7.59. Found: C, 55.08; H, 7.05.  $^1\text{H NMR}$  (400.30 MHz,  $\text{THF-}d_6$ ):  $\delta$  [ppm]: 6.84 (t,  $^3J_{\text{HH}} = 7.4\text{ Hz}$ , 4H, *o*- $\text{CH}_{\text{Ph}}$ ); 6.75-6.71 (m, 2H, *p*- $\text{CH}_{\text{Ph}}$ ); 6.63-6.65 (m, 4H, *m*- $\text{CH}_{\text{Ph}}$ ); 6.58-6.53 (m, 2H,  $\text{CH}_{\text{COT}}$ ); 6.41-6.36 (m, 4H,  $\text{CH}_{\text{COT}}$ ); 3.63-3.60 (m, 4H,  $\text{CH}_2^{\text{thf}}$ ); 1.79-1.76 (m, 4H,  $\text{CH}_2^{\text{thf}}$ ); 1.55 (sept,  $^3J_{\text{HH}} = 7.4\text{ Hz}$ , 6H,  $\text{Si}(\text{CHMe}_2)_3$ ); 1.13, 1.12 (two sets of d,  $^3J_{\text{HH}} = 7.4\text{ Hz}$ , 36H,  $\text{Si}(\text{CH}(\text{CH}_3)_2)_3$ ); 0.59 (s, 18H,  $\text{SiC}(\text{CH}_3)_3\text{Me}_2$ ); 0.42 (s, 6H,  $\text{Si}t\text{Bu}(\text{CH}_3)_2$ ); -0.36 (s, 6H,  $\text{Si}t\text{Bu}(\text{CH}_3)_2$ ).  $^{13}\text{C}\{^1\text{H}\}$  NMR (100.67 MHz,  $\text{THF-}d_6$ ):  $\delta$  [ppm]: 228.0 ( $\text{C}_{\alpha,\text{Pb}}$ ); 163.0 ( $\text{C}_{\text{quart,Ph}}$ ); 161.7 ( $\text{C}_{\beta,\text{Pb}}$ ); 130.8 ( $\text{C}_{\text{Ph}}$ ); 126.7 ( $\text{C}_{\text{Ph}}$ ); 124.1 ( $\text{C}_{\text{Ph}}$ ); 103.4 ( $\text{C}_{\text{COT}}$ ); 101.7 ( $\text{C}_{\text{COT}}$ ); 99.1 ( $\text{C}_{\text{COT}}$ ); 97.5 ( $\text{C}_{\text{quart,COT}}$ ); 68.4 ( $\text{C}_{\text{thf}}$ ); 29.7 ( $\text{SiC}(\text{CH}_3)_3(\text{CH}_3)_2$ ); 26.6 ( $\text{C}_{\text{thf}}$ ); 20.9 ( $\text{Si}(\text{CH}(\text{CH}_3)_2)_3$ ); 18.6 ( $\text{SiC}(\text{CH}_3)_3(\text{CH}_3)_2$ ); 13.5 ( $\text{Si}(\text{CH}(\text{CH}_3)_2)_3$ ); 5.9 ( $\text{Si}t\text{Bu}(\text{CH}_3)_2$ ); 3.7 ( $\text{Si}t\text{Bu}(\text{CH}_3)_2$ ).  $^7\text{Li}\{^1\text{H}\}$  NMR (116.64 MHz,  $\text{THF-}d_6$ ):  $\delta$  [ppm]: -0.51.  $^{29}\text{Si}\{^1\text{H}\}$  NMR (79.52 MHz,  $\text{THF-}d_6$ ):  $\delta$  [ppm]: 7.3 ( $\text{Si}i\text{Pr}_3$ ); 0.7 ( $\text{Si}t\text{BuMe}_2$ ). IR (ATR):  $\tilde{\nu}$  ( $\text{cm}^{-1}$ ) = 3058 (w), 2930 (vs), 2888 (w), 2861 (vs), 1595 (w), 1555 (w), 1490 (w), 1463 (vs), 1384 (w), 1361 (w), 1316 (w), 1244 (s), 1208 (w), 1183 (w), 1072 (w), 1029 (m), 953 (m), 932 (w), 881 (s), 855 (w), 824 (s), 803 (w), 762 (m), 736 (w), 697 (m), 642 (s), 585 (m), 514 (w), 441 (w).



### Synthesis of $[\text{Li}(\text{thf})(\eta^5\text{-L}^{\text{Pb}})\text{Ce}(\eta^8\text{-COT}^{\text{TIPS}})]$ (**6**)

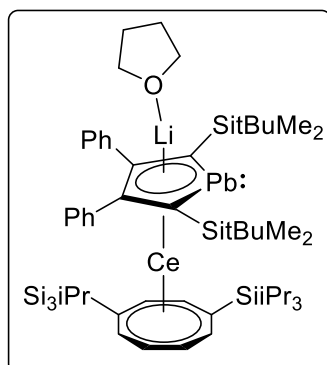

To a mixture of  $[\text{Li}_2(\text{thf})_2(\text{L}^{\text{Pb}})]$  (115 mg, 0.144 mmol, 1.00 eq) and **2** (82 mg, 0.144 mmol, 1.00 eq) was condensed THF (10 mL) at  $-88\text{ }^\circ\text{C}$ . The resulting brownish-red solution was slowly warmed up to room temperature and stirred 12 h at room temperature, during which time the solution became orange-brown. All volatiles were removed under reduced pressure and the solid residue was extracted with hot *n*-heptane (10 mL). Subsequently, the *n*-heptane extract was concentrated until the formation of a brown solid was observed. The resulting suspension was gently heated until all

solids were redissolved and storage of the saturated solution at room temperature for 12 h led to the formation of single crystals suitable for X-ray diffraction. After removing approximately 5 mg of crystals for SCXRD experiments, each batch was further stored at  $-10\text{ }^\circ\text{C}$  for one week to induce crystallization of the residual product. Separation from the mother liquor and drying *in vacuo* for 1 h gave **5** as orange-green crystalline material. The paramagnetic behavior of **6** did not allow recording meaningful NMR-spectra.

Yield (based on crystals): 90 mg (0.070 mmol), 49%. Anal. Calcd for  $\text{C}_{58}\text{H}_{96}\text{LiOSi}_4\text{CePb}$  (1274.79): C, 54.60; H, 7.58. Found: C, 54.61; H, 7.38. **IR (ATR):**  $\tilde{\nu}$  ( $\text{cm}^{-1}$ ) = 3065 (w), 2929 (vs), 2888 (w), 2862 (vs), 1595 (w), 1555 (m), 1489 (w), 1463 (s), 1385 (w), 1362 (w), 1310 (w), 1245 (s), 1182 (w), 1071 (w), 1010 (m), 952 (w), 920 (w), 882 (m), 854 (w), 824 (vs), 805 (w), 760 (m), 719 (w), 670 (w), 646 (m), 582 (w), 512 (w), 431 (w).

### Synthesis of $[\text{Li}(\text{thf})(\eta^5\text{-L}^{\text{Pb}})\text{Sm}(\eta^8\text{-COT}^{\text{TIPS}})]$ (**7**)

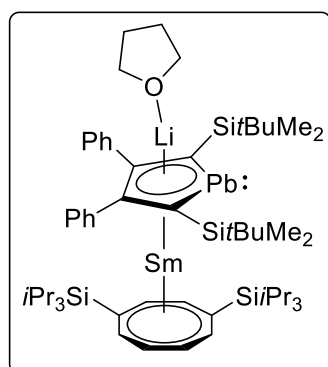

To a mixture of  $[\text{Li}_2(\text{thf})_2(\text{L}^{\text{Pb}})]$  (120 mg, 0.150 mmol, 1.00 eq) and **3** (88 mg, 0.150 mmol, 1.00 eq) was condensed THF (10 mL) at  $-88\text{ }^\circ\text{C}$ . The resulting brownish-red solution was slowly warmed up to room temperature and stirred 12 h at room temperature, during which time the solution became orange-brown. All volatiles were removed under reduced pressure. The solid residue was extracted with toluene (10 mL). Afterwards, the toluene solution was concentrated until the formation of a brown solid was observed. The resulting suspension was gently heated

until all solids were redissolved. Subsequently, single crystals suitable for X-ray diffraction analysis were obtained from the concentrated toluene solution after storage at  $5\text{ }^\circ\text{C}$  for one week. After removing approximately 5 mg of crystals for SCXRD experiments, each batch was separated from the mother liquor to give **7** as orange-green crystalline material after drying *in vacuo* for 1 h.

Yield (based on crystals): 87 mg (0.068 mmol), 45%. Anal. Calcd for  $\text{C}_{58}\text{H}_{96}\text{LiSi}_4\text{Sm}$  (1286.25): C, 54.16; H, 7.52. Found: C, 54.19; H, 7.17. Due to the paramagnetic behavior of **7**, one of the

$CH_{Ph}$  resonances is not visible in the  $^1H$ -NMR and the  $^{13}C\{^1H\}$ -NMR spectrum.  **$^1H$  NMR** (400.30 MHz, THF- $d_8$ ):  $\delta$  [ppm]: 10.86 (s, 2H,  $CH_{COT}$ ); 8.62 (br s, 2H,  $CH_{COT}$ ); 7.20-7.06 (m, 3H,  $CH_{tol}$ ); 6.34 (m, 2H,  $CH_{Ph}$ ); 6.14 (br s, 4H,  $CH_{Ph}$ ); 5.93 (br s, 2H,  $CH_{COT}$ ); 3.63-3.60 (m, 4H,  $CH_{2\ thf}$ ); 2.30 (s, 1.8H,  $CH_{3\ tol}$ ); 1.79-1.76 (m, 4H,  $CH_{2\ thf}$ ); 1.22 (s, 18H,  $SiC(CH_3)_3Me_2$ ); 0.93 (sept,  $^3J_{HH} = 7.4$  Hz, 6H,  $Si(CHMe_2)_3$ ); 0.74 (d,  $^3J_{HH} = 7.4$  Hz, 18H,  $Si(CH(CH_3)_2)_3$ ); 0.65 (d,  $^3J_{HH} = 7.4$  Hz, 18H,  $Si(CH(CH_3)_2)_3$ ); 0.53 (s, 6H,  $Si^tBu(CH_3)_2$ ); -0.60 (s, 6H,  $Si^tBu(CH_3)_2$ ).  **$^{13}C\{^1H\}$  NMR** (100.67 MHz, THF- $d_8$ ):  $\delta$  [ppm]: 169.3 ( $C_{\alpha, Pb}$ ); 169.0 ( $C_{\beta, Pb}$ ); 138.6 ( $C_{quart, tol}$ ); 129.8 ( $C_{tol}$ ); 129.1 ( $C_{tol}$ ); 128.5 ( $C_{quart, Ph}$ ); 126.2 ( $C_{tol}$ ); 125.3 ( $C_{Ph}$ ); 123.5 ( $C_{Ph}$ ); 94.2 ( $C_{COT}$ ); 86.9 ( $C_{COT}$ ); 85.4 ( $C_{COT}$ ); 79.2 ( $C_{COT}$ ); 68.4 ( $C_{thf}$ ); 29.6 ( $SiC(CH_3)_3Me_2$ ); 26.0 ( $C_{thf}$ ); 21.7 ( $CH_{3\ tol}$ ); 20.2 ( $Si(CH(CH_3)_2)_3$ ); 20.1 ( $Si(CH(CH_3)_2)_3$ ); 16.4 ( $SiC(CH_3)_3Me_2$ ); 11.3 ( $Si(CHMe_2)_3$ ); 4.8 ( $Si^tBu(CH_3)_2$ ); 4.1 ( $Si^tBu(CH_3)_2$ ).  **$^{29}Si\{^1H\}$  NMR** (79.52 MHz, THF- $d_8$ ):  $\delta$  [ppm]: 15.6 ( $Si^iPr_3$ ); 5.0 ( $Si^tBuMe_2$ ). **IR (ATR)**:  $\tilde{\nu}$  ( $cm^{-1}$ ) = 2945 (vs), 2861 (vs), 1596 (w), 1556 (w), 1491 (w), 1463 (s), 1385 (w), 1360 (w), 1315 (w), 1244 (s), 1209 (w), 1179 (w), 1072 (w), 1026 (m), 953 (m), 935 (w), 920 (w), 881 (m), 855 (w), 824 (w), 800 (m), 763 (m), 742 (w), 698 (m), 643 (m), 585 (m), 511 (w), 2887 (w), 444 (w), 477 (w).

### Synthesis of [Li(thf)( $\eta^5$ -L<sup>Pb</sup>)Er( $\eta^8$ -COT<sup>TIPS</sup>)] (**8**)

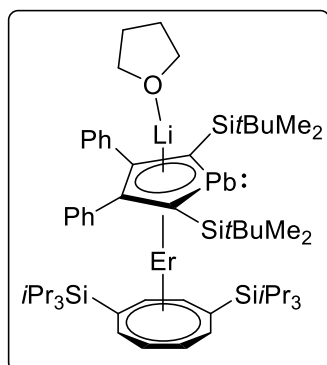

To a mixture of [Li<sub>2</sub>(thf)<sub>2</sub>(L<sup>Pb</sup>)] (122 g, 0.153mmol, 1.00 eq) and **4** (92 mg, 0.153 mmol, 1.00 eq) was condensed THF (10 mL) at -88 °C. The resulting brownish-red solution was slowly warmed up to room temperature and stirred 12 h at room temperature, during which time the solution became orange-brown. All volatiles were removed under reduced pressure and the solid residue was extracted with hot *n*-heptane (10 mL). Subsequently, the *n*-heptane extract was concentrated until the formation of a

brown solid was observed. The resulting suspension was gently heated until all solids were redissolved and storage of the saturated solution at room temperature for 12 h led to the formation of single crystals suitable for X-ray diffraction. After removing approximately 5 mg of crystals for SCXRD experiments, each batch was further stored at -10 °C for one week to induce crystallization of the residual product. Separation from the mother liquor and drying *in vacuo* for 1 h gave **5** as orange-green crystalline material. The paramagnetic behavior of **8** did not allow recording meaningful NMR-spectra.

Yield (based on crystals): 78 mg (0.060 mmol), 39%. Anal. Calcd. for C<sub>58</sub>H<sub>96</sub>ErLiOPbSi<sub>4</sub> (1303.14): C, 53.46; H, 7.43. Found: C, 53.08; H, 6.73. **IR (ATR):**  $\tilde{\nu}$  (cm<sup>-1</sup>) = 2944 (s), 2886 (w), 2862 (vs), 1596 (w), 1556 (w), 1489 (w), 1464 (s), 1385 (m), 1362 (w), 1312 (w), 1244 (s), 1209 (w), 1187 (w), 1152 (w), 1028 (m), 956 (m), 934 (w), 882 (s), 855 (w), 822 (w), 804 (vs), 763 (m), 736 (w), 701 (m), 637 (s), 583 (m), 511 (w).

### Synthesis of $[\text{Li}(\text{Et}_2\text{O})_{3.4}(\text{thf})_{0.6}][(\eta^5\text{-L}^{\text{Pb}})\text{Er}(\eta^8\text{-COT}^{\text{TIPS}})]$ (**9**)

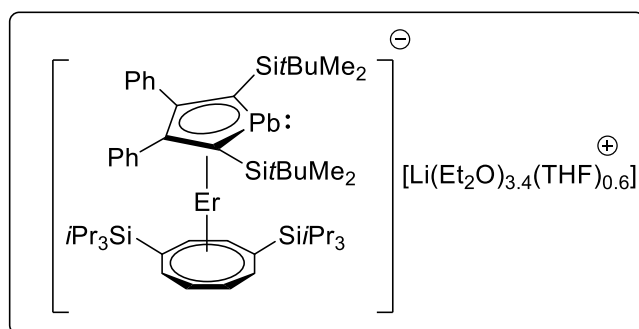

To a mixture of  $[\text{Li}_2(\text{thf})_2(\text{L}^{\text{Pb}})]$  (143 mg, 0.180 mmol, 1.00 eq) and **4** (107 mg, 0.180 mmol, 1.00 eq) was condensed THF (10 mL) at  $-88\text{ }^\circ\text{C}$ . The resulting brownish-red solution was slowly warmed up to room temperature and stirred 12 h at room temperature upon which the mixture became orange-brown. All volatiles

were removed under reduced pressure. The solid residue was extracted with toluene (10 mL). After removal of the solvent *in vacuo*, the solid residue was dissolved in  $\text{Et}_2\text{O}$  (10 mL) upon which the solution became dark red. Crystals suitable for X-ray diffraction analysis were obtained by slow evaporation of the  $\text{Et}_2\text{O}$  solution at room temperature. After removing approximately 5 mg of crystalline material from the sample for SCXRD experiments, the residual material was washed with cold  $\text{Et}_2\text{O}$  and dried *in vacuo* at room temperature for 30 min to give compound **9** as dark red crystalline material.

Yield (based on crystals): 78 mg (0.073 mmol), 41%.

Note: elemental analysis of compound **9** indicated partial removal of the Li-coordinated solvents after drying of **9** *in vacuo* (30 min, room temperature). This tentatively results in a compound similar to **8**. Found: C, 52.80; H, 6.82. However, elemental analysis does not allow to distinguish between Li-coordinated  $\text{Et}_2\text{O}$  or THF as the elemental composition of these two only differs by two hydrogen atoms: Anal. Calcd. for  $\text{C}_{54}\text{H}_{88}\text{ErLiPbSi}_4$  ( $\text{C}_4\text{H}_8\text{O}$ ) (1303.14): C, 53.46; H, 7.43. for  $\text{C}_{54}\text{H}_{88}\text{ErLiPbSi}_4$  ( $\text{C}_4\text{H}_{10}\text{O}$ ). Thus, the exact composition of the isolated material could not be determined. **IR (ATR):**  $\tilde{\nu}$  ( $\text{cm}^{-1}$ ) = 2943 (vs), 2928 (vs), 2891 (s), 2862 (vs), 1559 (w), 1488 (w), 1463 (s), 1386 (m), 1361 (m), 1306 (w), 1247 (m), 1133 (s), 1099 (m), 1071 (m), 1017 (m), 918 (m), 883 (m), 850 (w), 825 (s), 807 (w), 758 (m), 702 (w), 669 (w), 645 (m), 579 (w), 523 (w). The IR spectrum of **9** was recorded again after sufficient drying under vacuum: **IR (ATR):**  $\tilde{\nu}$  ( $\text{cm}^{-1}$ ) = 2924 (vs), 2888 (vs), 2860 (vs), 1595 (w), 1487 (w), 1463 (s), 1384 (w), 1362 (s), 1305 (w), 1290 (m), 1245 (s), 1134 (s), 1097 (vs), 1071 (m), 1024 (vs), 956 (m), 921 (s), 882 (s), 854 (m), 823 (m), 805 (s), 767 (m), 737 (v), 725 (m), 700 (m), 665 (m), 578 (s), 523 (m).

### Synthesis of $[\text{Li}(\text{12-c-4})_2][(\eta^5\text{-L}^{\text{Pb}})\text{Er}(\eta^8\text{-COT}^{\text{TIPS}})]$ (**10**)

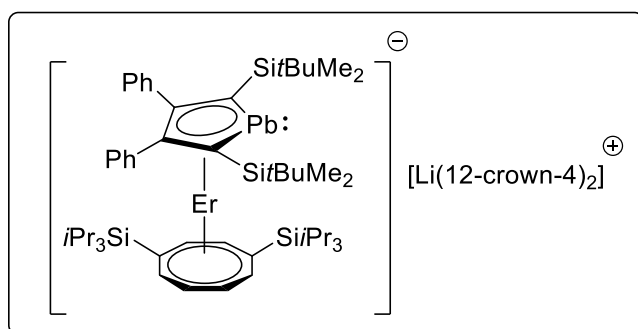

To a mixture of  $[\text{Li}_2(\text{thf})_2(\text{L}^{\text{Pb}})]$  (110 mg, 0.138 mmol; 1.00 eq) and **4** (86 mg, 0.138 mmol; 1.00 eq) was condensed THF (10 mL) at  $-88\text{ }^\circ\text{C}$ . The resulting brownish-red solution was slowly warmed up to room temperature and stirred 12 h at room temperature, during which time the

solution became orange-brown. All volatiles were removed under reduced pressure. The solid residue was extracted with toluene (10 mL). To the toluene solution was added 12-crown-4 (0.050 g, 0.284 mmol). The color of the solution changed from dark brown to dark red immediately and the solution was stirred for 2 h at room temperature. Afterwards the solvent was removed until crystallization was imminent and small amounts of precipitated solids were redissolved by gentle heating. Subsequent storage at  $-30\text{ }^\circ\text{C}$  for two days led to the formation of a dark red crystalline material. Afterwards, the mother liquor was removed and after drying residue *in vacuo* for 1 h compound **10** was obtained as dark red, crystalline material. Crystals suitable for X-ray diffraction analysis were obtained by redissolving the isolated crystalline material in hot toluene and subsequent storage of the saturated solution at room temperature for 12 h. The paramagnetic behavior of **10** did not allow recording meaningful NMR-spectra. Yield (based on crystals): 90 mg (0.057 mmol), 41%. Anal. Calcd. for  $\text{C}_{70}\text{H}_{120}\text{ErLiO}_8\text{Si}_4\text{Pb}$  (1583.46): C, 53.10; H, 7.64. Found: C, 52.75; H, 7.63. IR (ATR):  $\tilde{\nu}$  ( $\text{cm}^{-1}$ ) = 2943 (s), 2890 (m), 2861 (vs), 1595 (w), 1555 (w), 1463 (m), 1385 (m), 1361 (w), 1306 (w), 1291 (m), 1246 (m), 1133 (s), 1097 (s), 1071 (m), 1019 (m), 917 (m), 882 (m), 844 (m), 824 (m), 805 (m), 765 (w), 720 (w), 701 (w), 665 (w), 611 (w), 576 (w), 514 (w).

## NMR Spectra

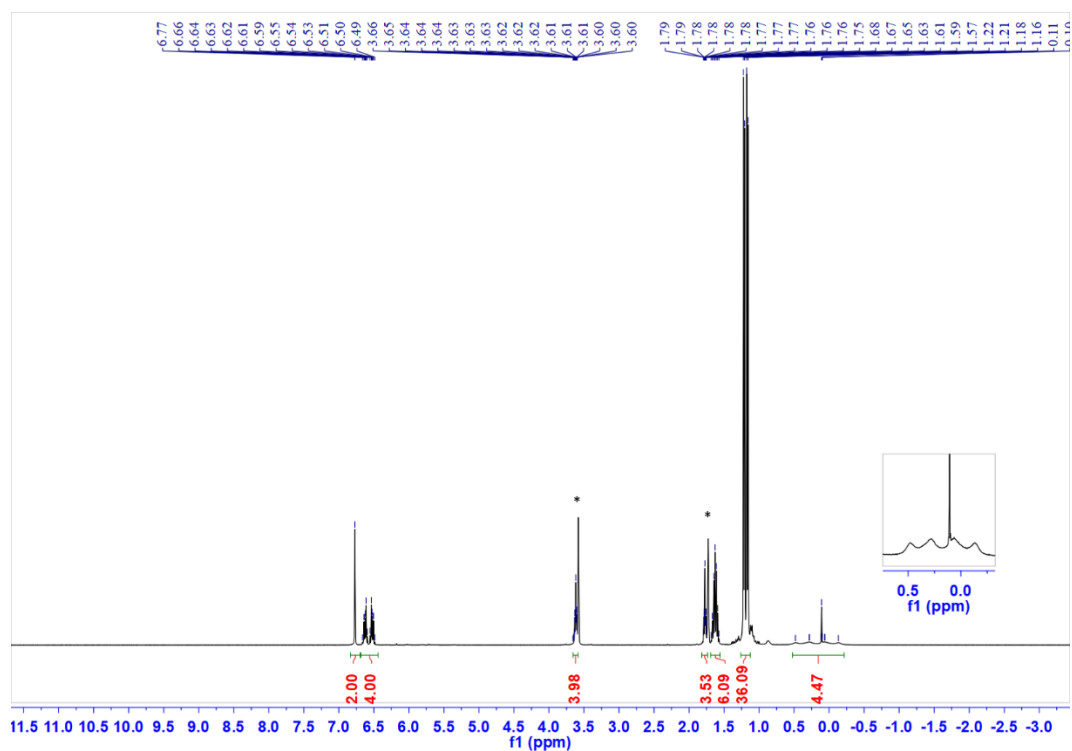

**Figure S1.**  $^1\text{H}$  NMR spectrum of  $[\text{La}(\eta^8\text{-COT}^{\text{TIPS}})\text{BH}_4]$  (1) in  $\text{THF-}d_8$ : \*, residual protio solvent signal.

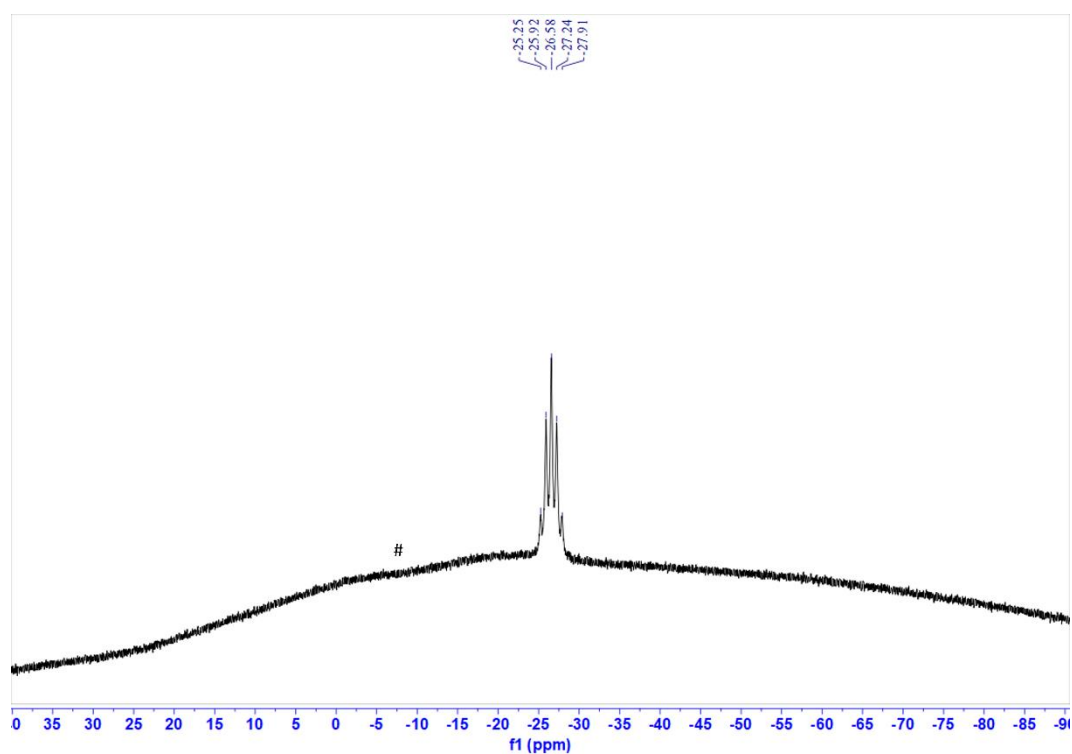

**Figure S2.**  $^{11}\text{B}$  NMR spectrum of  $[\text{La}(\eta^8\text{-COT}^{\text{TIPS}})\text{BH}_4]$  (1) in  $\text{THF-}d_8$ : #, background signal from NMR tube (made of borosilicate glass).

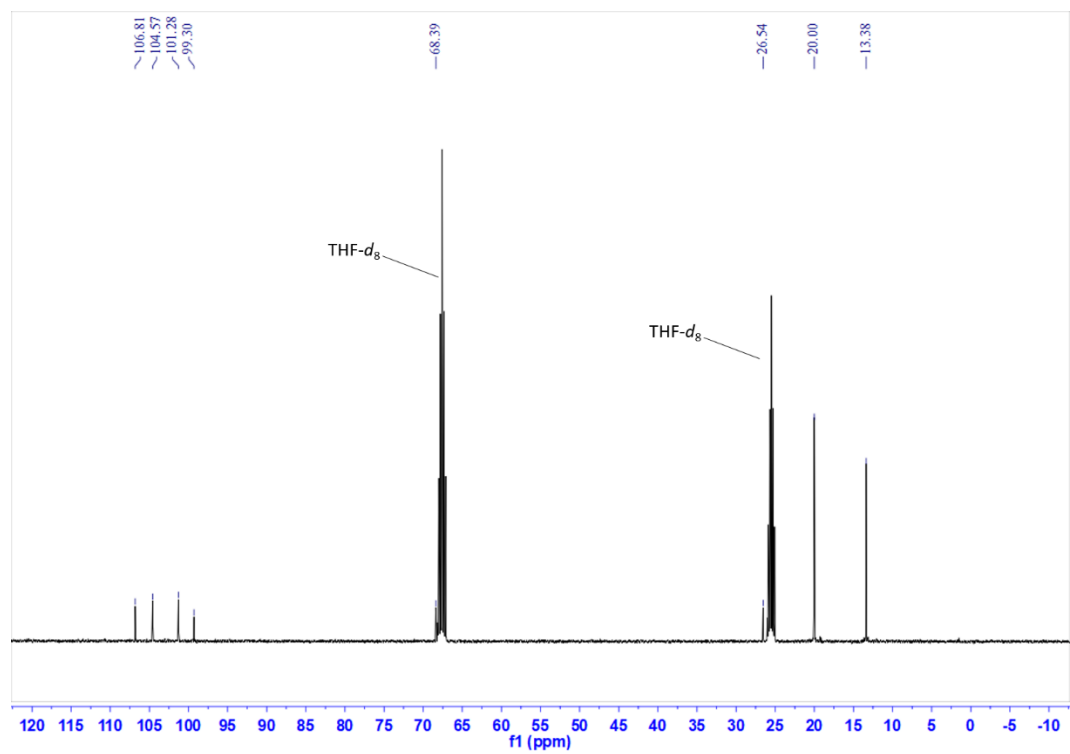

**Figure S3.**  $^{13}\text{C}\{^1\text{H}\}$  NMR spectrum of  $[\text{La}(\eta^8\text{-COT}^{\text{TIPS}})\text{BH}_4]$  (**1**) in  $\text{THF-}d_8$ .

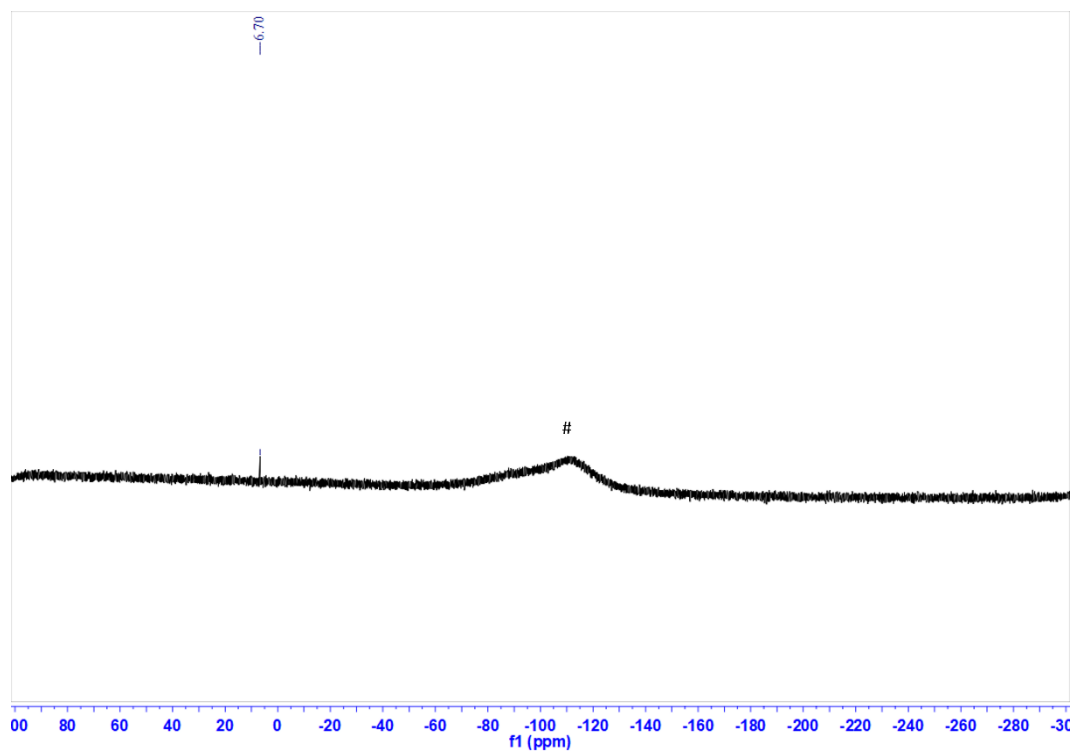

**Figure S4.**  $^{29}\text{Si}\{^1\text{H}\}$  NMR spectrum of  $[\text{La}(\eta^8\text{-COT}^{\text{TIPS}})\text{BH}_4]$  (**1**) in  $\text{THF-}d_8$ : #, background signal from NMR tube (made of borosilicate glass).

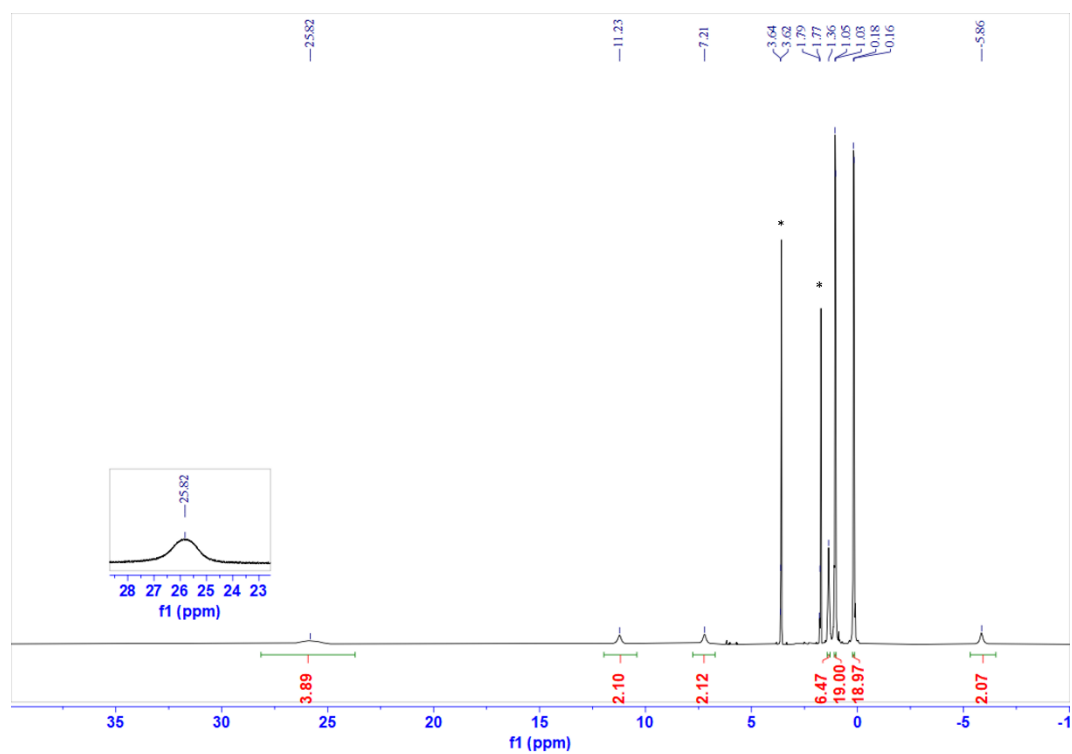

**Figure S5.**  $^1\text{H}$  NMR spectrum of  $[\text{Ce}(\eta^8\text{-COT}^{\text{TIPS}})\text{BH}_4]$  (**2**) in  $\text{THF-}d_8$ : \*, residual protio solvent signal.

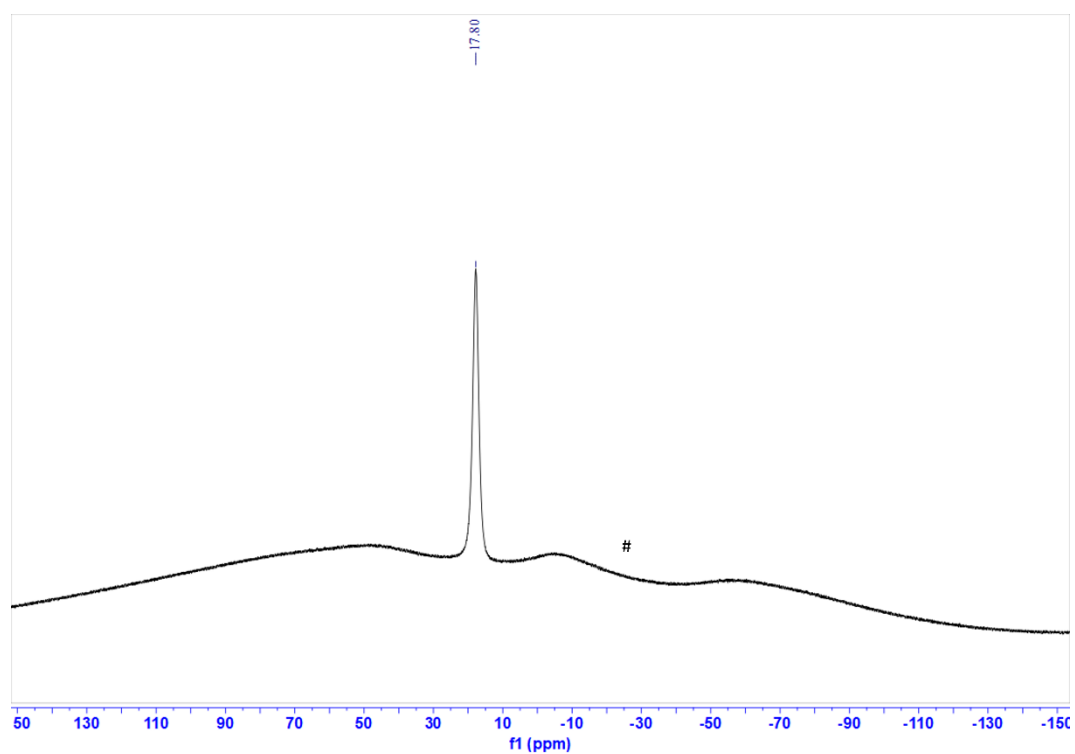

**Figure S6.**  $^{11}\text{B}$  NMR spectrum of  $[\text{Ce}(\eta^8\text{-COT}^{\text{TIPS}})\text{BH}_4]$  (**2**) in  $\text{THF-}d_8$ : #, background signal from NMR tube (made of borosilicate glass).



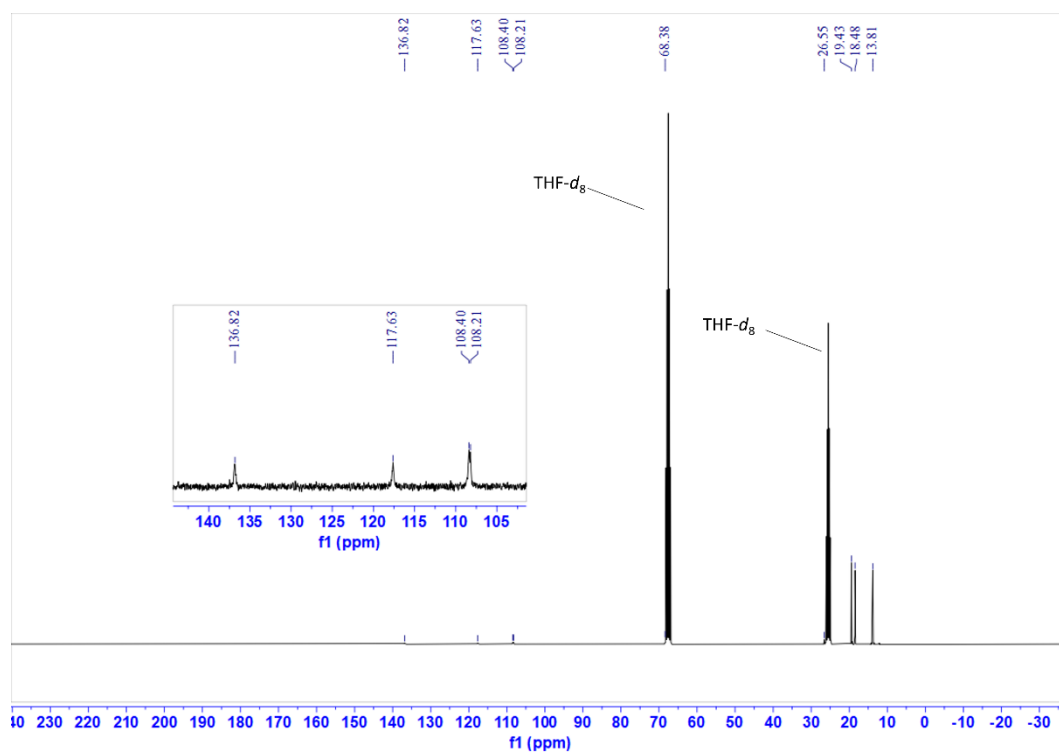

**Figure S7.**  $^{13}\text{C}\{^1\text{H}\}$  NMR spectrum of  $[\text{Ce}(\eta^8\text{-COT}^{\text{TIPS}})\text{BH}_4]$  (**2**) in  $\text{THF-}d_8$ .

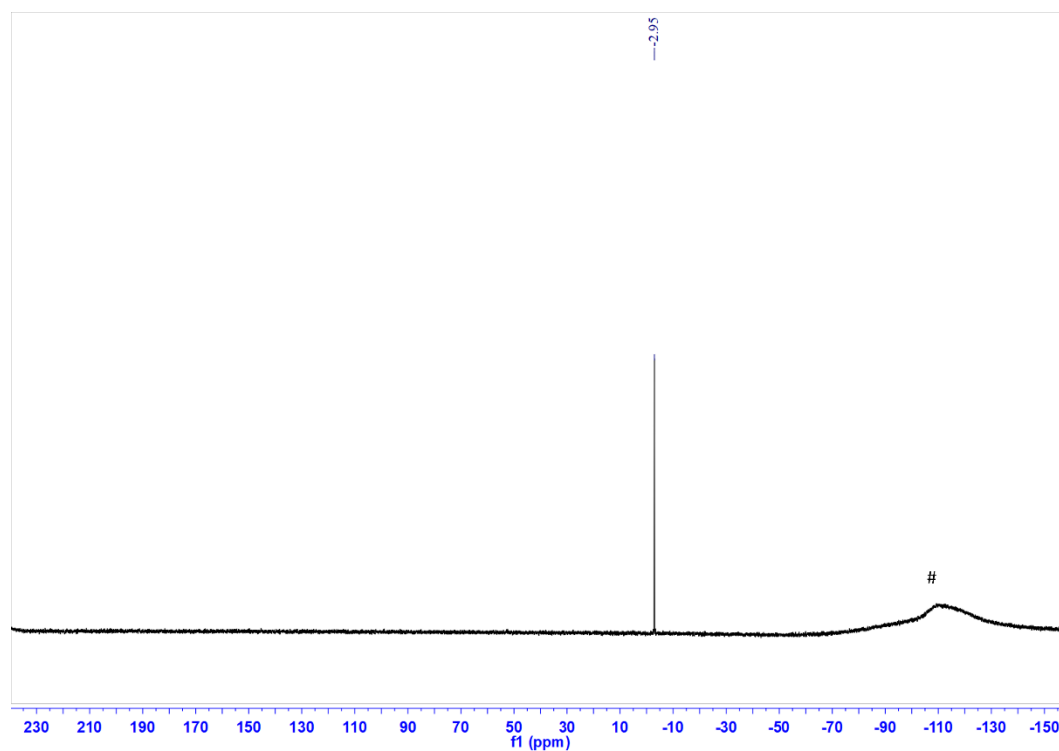

**Figure S8.**  $^{29}\text{Si}\{^1\text{H}\}$  NMR spectrum of  $[\text{Ce}(\eta^8\text{-COT}^{\text{TIPS}})\text{BH}_4]$  (**2**) in  $\text{THF-}d_8$ : #, background signal from NMR tube (made of borosilicate glass).

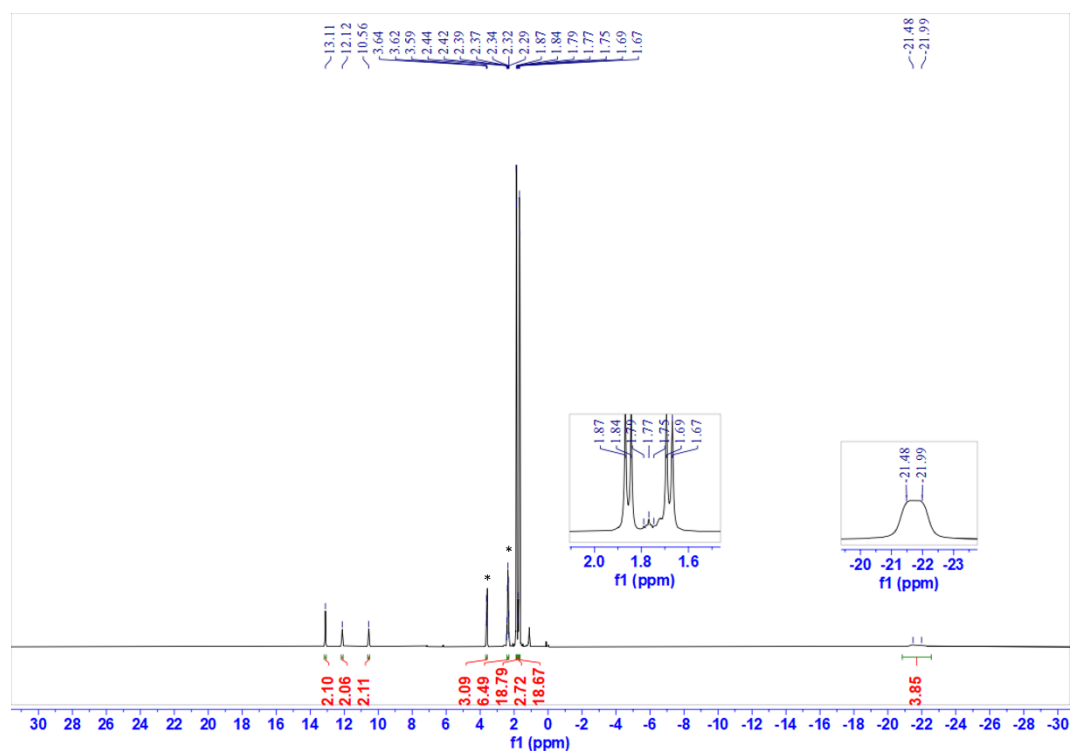

**Figure S9.**  $^1\text{H}$  NMR spectrum of  $[\text{Sm}(\eta^8\text{-COT}^{\text{TIPS}})\text{BH}_4]$  (**3**) in  $\text{THF-}d_8$ : \*, residual protio solvent signal.

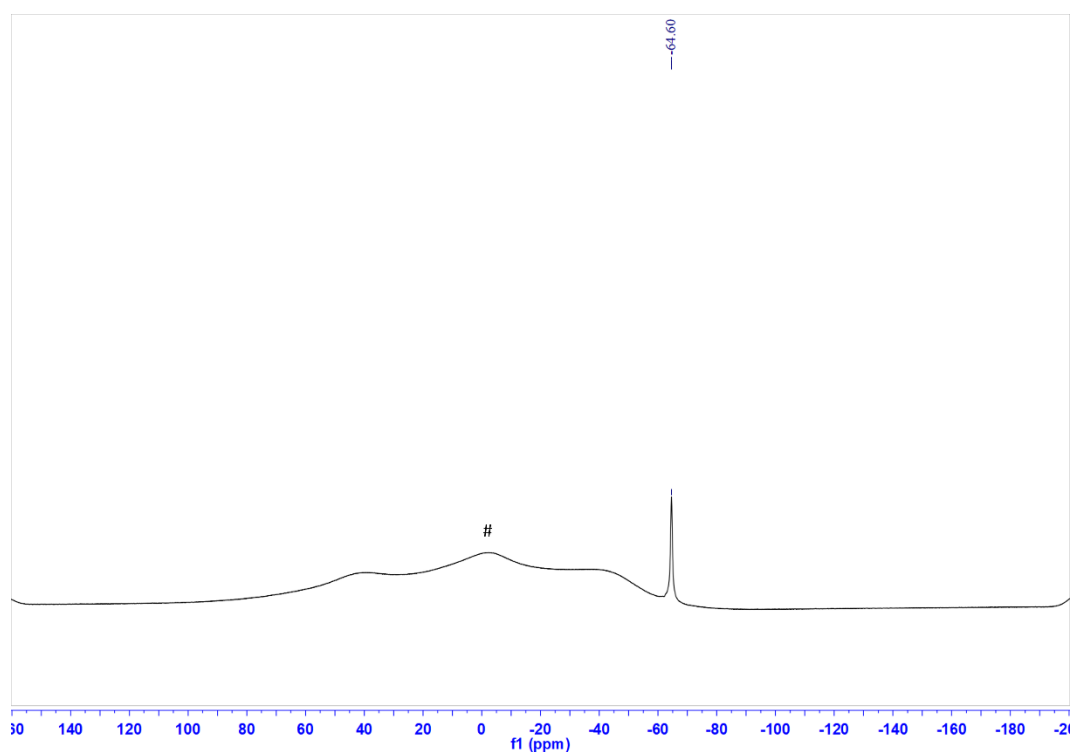

**Figure S10.**  $^{11}\text{B}$  NMR spectrum of  $[\text{Sm}(\eta^8\text{-COT}^{\text{TIPS}})\text{BH}_4]$  (**3**) in  $\text{THF-}d_8$ : #, background signal from NMR tube (made of borosilicate glass).

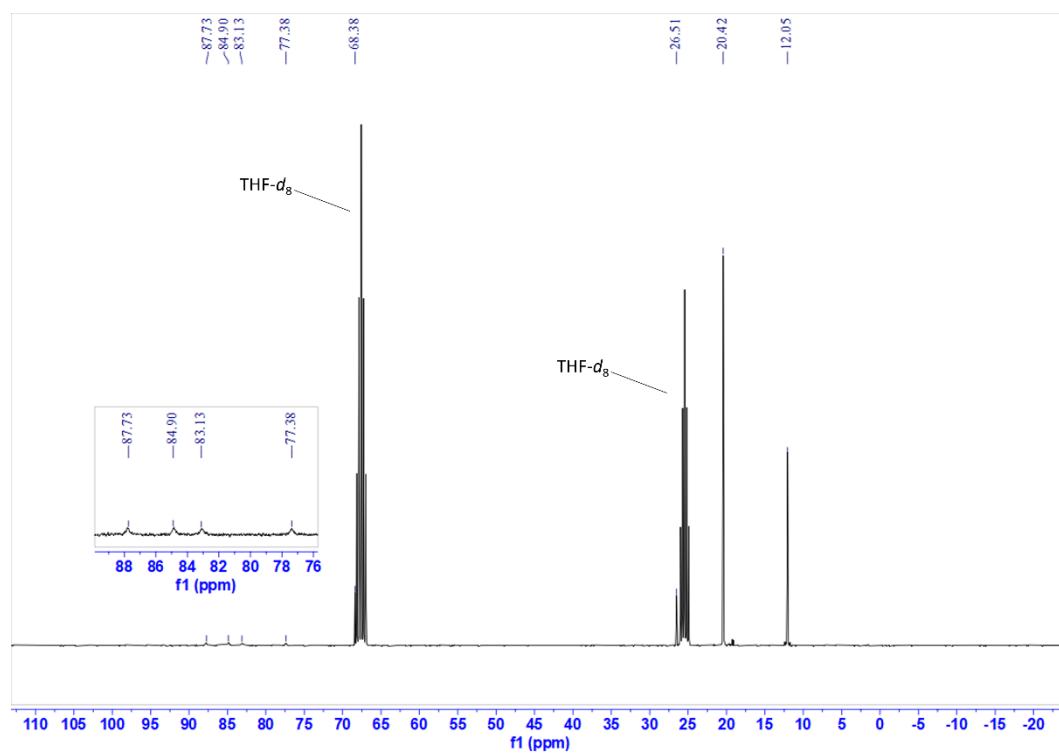

**Figure S11.**  $^{13}\text{C}\{^1\text{H}\}$  NMR spectrum of  $[\text{Sm}(\eta^8\text{-COT}^{\text{TIPS}})\text{BH}_4]$  (**3**) in  $\text{THF-}d_8$ .

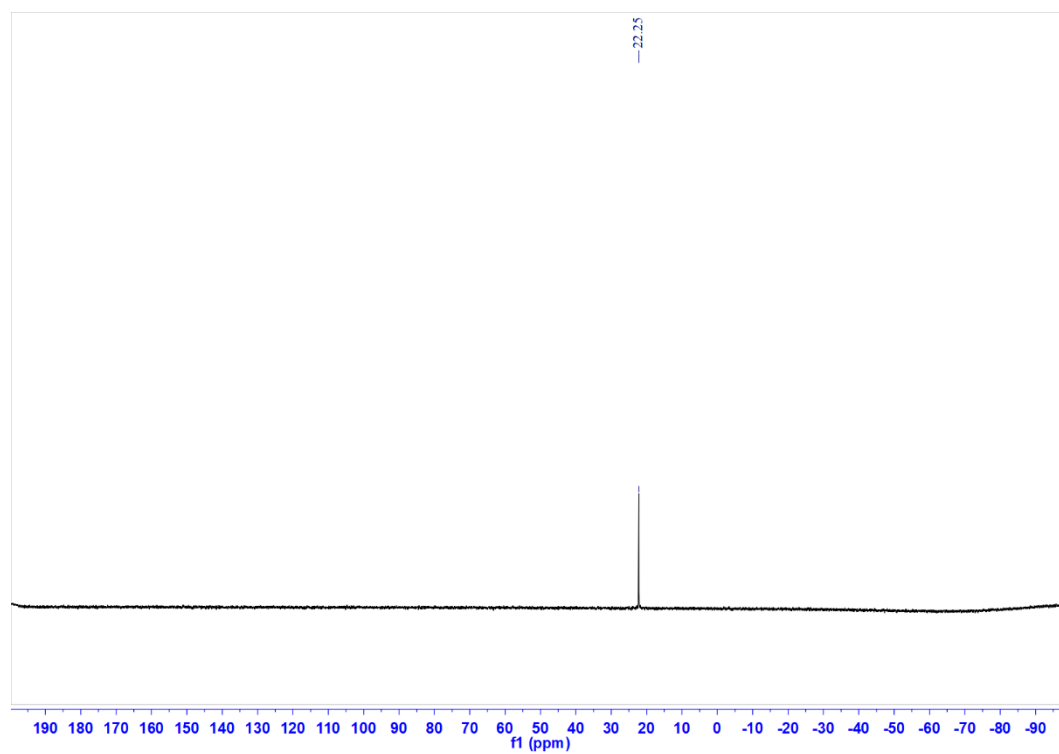

**Figure S12.**  $^{29}\text{Si}\{^1\text{H}\}$  NMR spectrum of  $[\text{Sm}(\eta^8\text{-COT}^{\text{TIPS}})\text{BH}_4]$  (**3**) in  $\text{THF-}d_8$ .

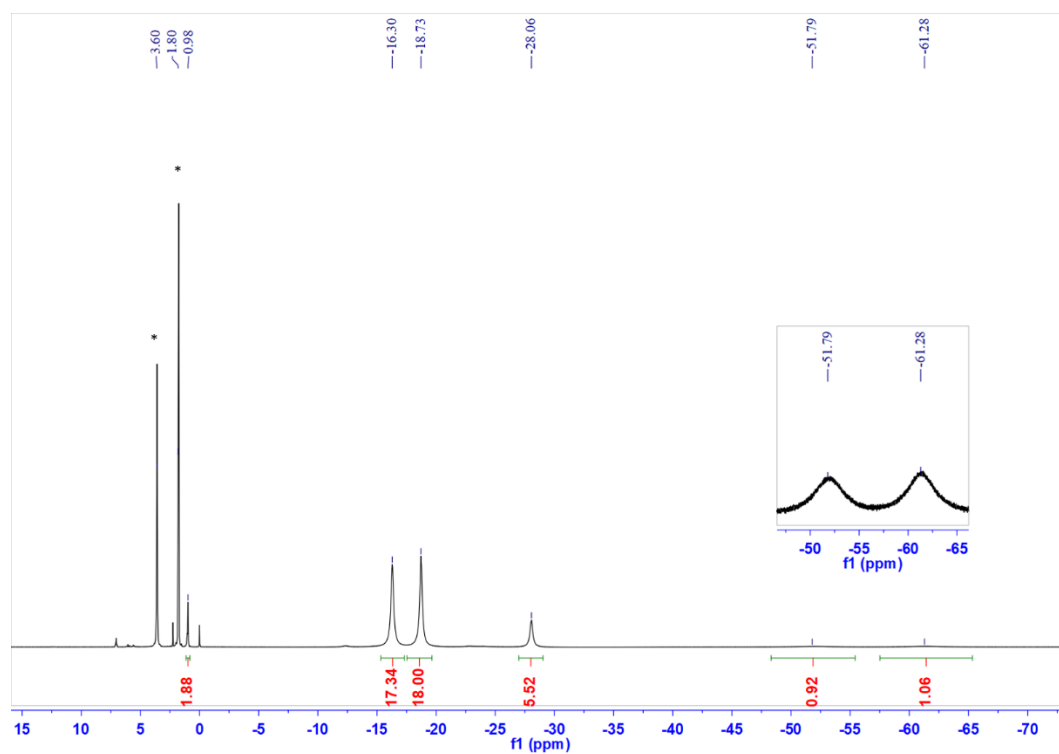

**Figure S13.**  $^1\text{H}$  NMR spectrum of  $[\text{Er}(\eta^8\text{-COT}^{\text{TIPS}})\text{BH}_4]$  (**4**) in  $\text{THF-}d_8$ : \*, residual protio solvent signal.

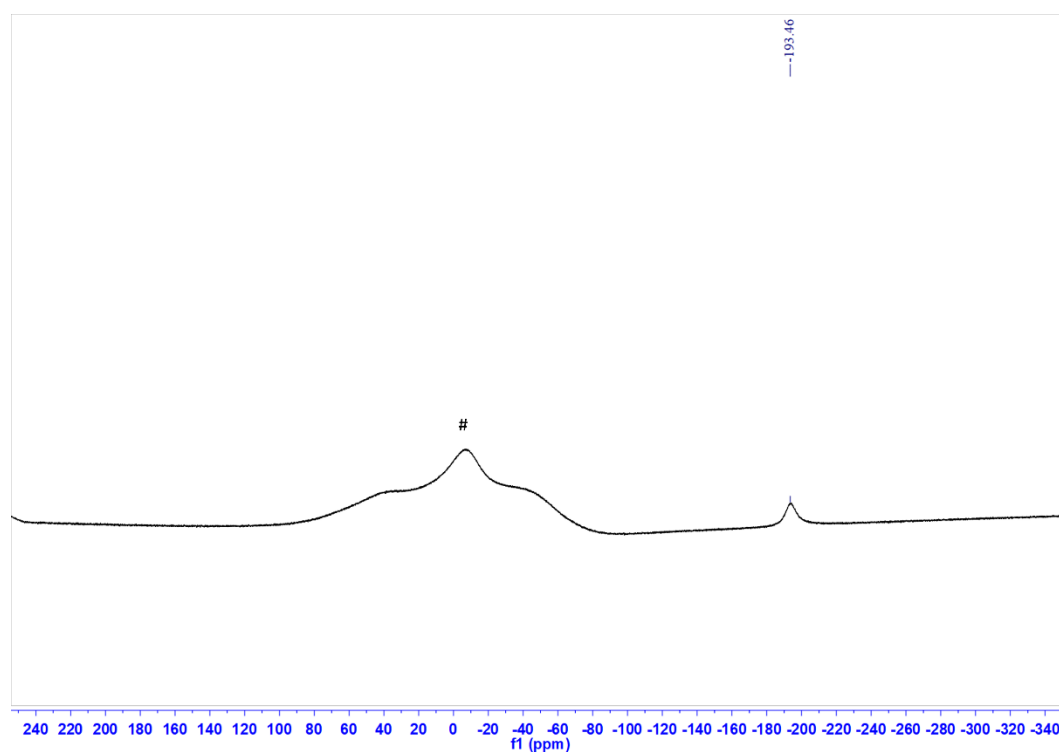

**Figure S14.**  $^{11}\text{B}$  NMR spectrum of  $[\text{Er}(\eta^8\text{-COT}^{\text{TIPS}})\text{BH}_4]$  (**4**) in  $\text{THF-}d_8$ : #, background signal from NMR tube (made of borosilicate glass).

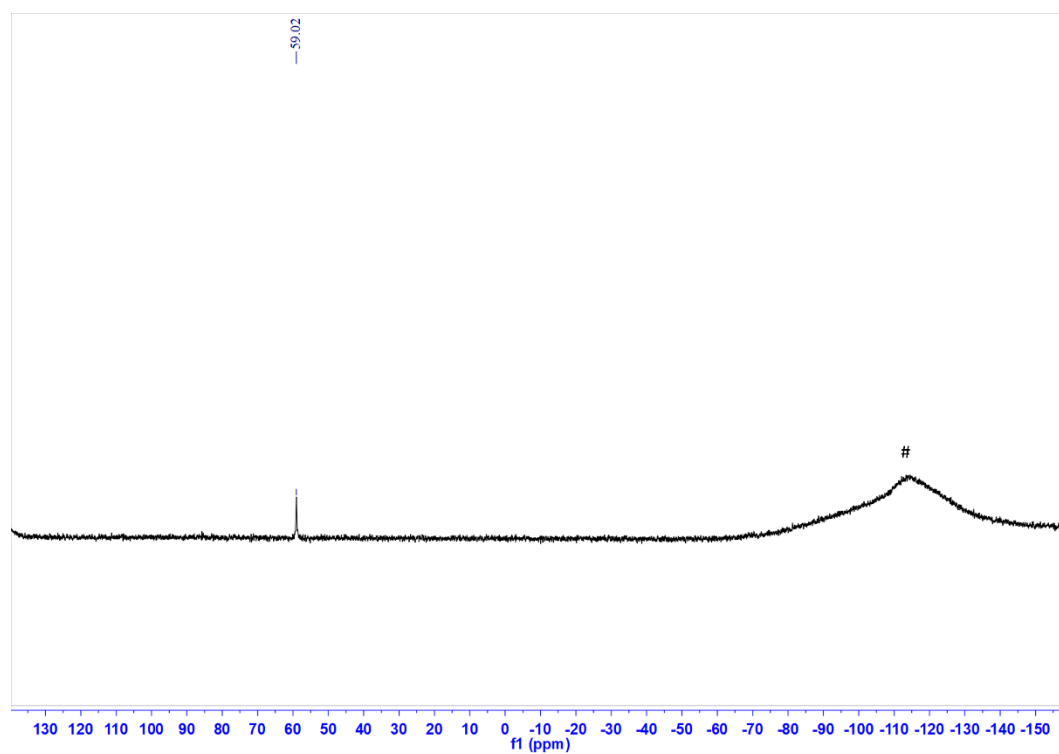

**Figure S15.**  $^{29}\text{Si}\{^1\text{H}\}$  NMR spectrum of  $[\text{Er}(\eta^8\text{-COT}^{\text{TIPS}})\text{BH}_4]$  (**4**) in  $\text{THF-}d_8$ : #, background signal from NMR tube (made of borosilicate glass).

### NMR Spectra of 5-10

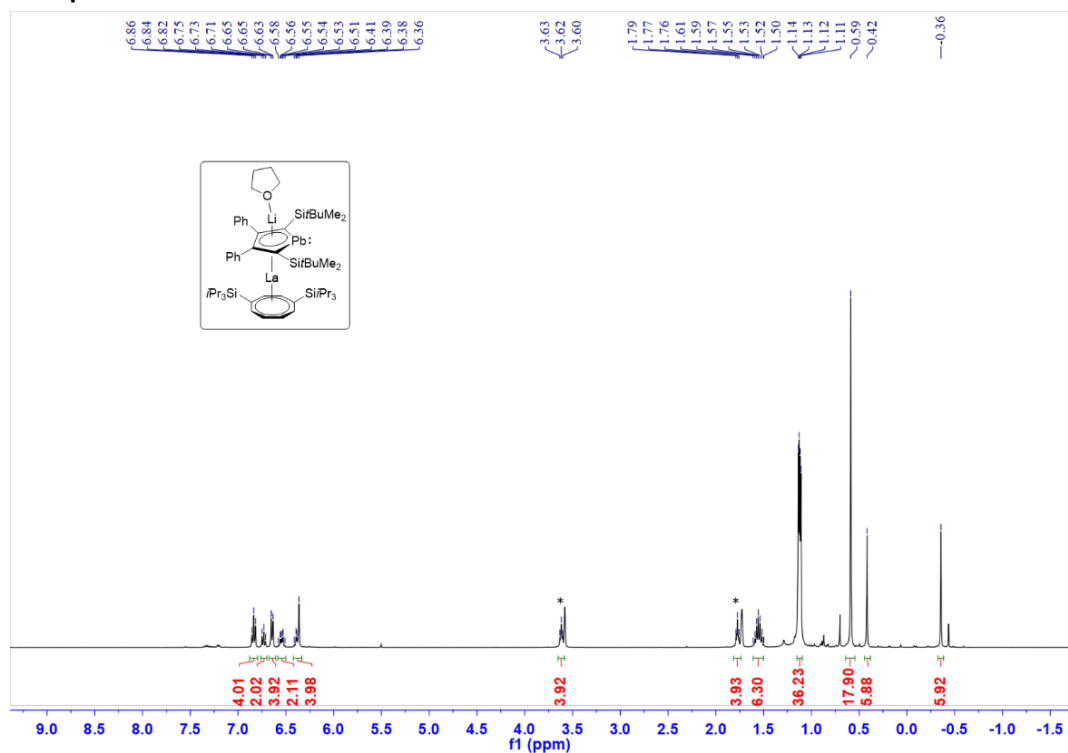

**Figure S16.**  $^1H$  NMR spectrum of  $[Li(thf)(\eta^5-L^{Pb})La(\eta^8-COT^{TIPS})]$  (5) in  $THF-d_8$ : \*, residual protio solvent signal.

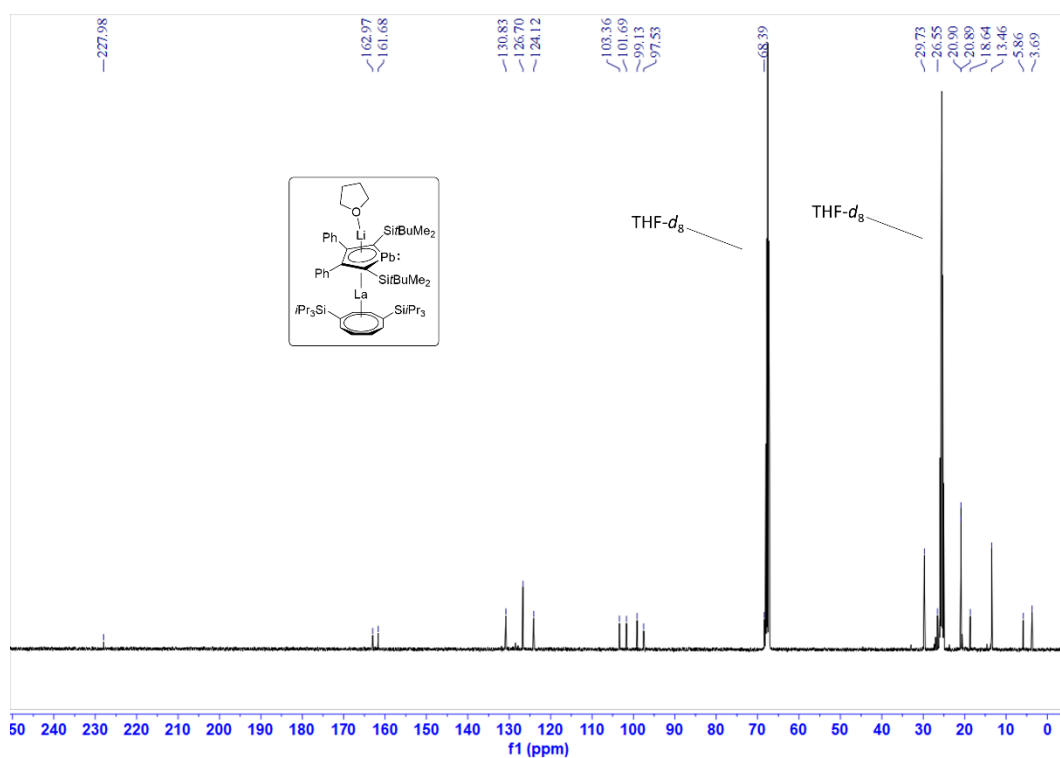

**Figure S17.**  $^{13}C\{^1H\}$  NMR spectrum of  $[Li(thf)(\eta^5-L^{Pb})La(\eta^8-COT^{TIPS})]$  (5) in  $THF-d_8$ .

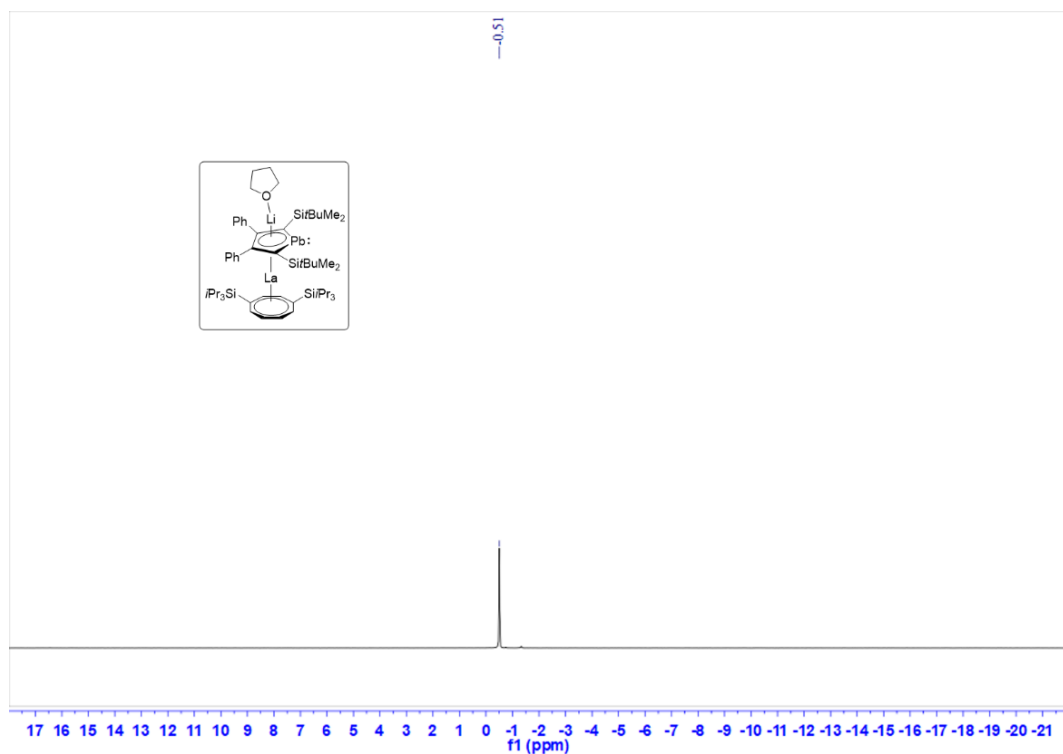

**Figure S18.**  ${}^7\text{Li}\{^1\text{H}\}$  NMR spectrum of  $[\text{Li}(\text{thf})(\eta^5\text{-L}^{\text{Pb}})\text{La}(\eta^8\text{-COT}^{\text{TIPS}})]$  (5) in  $\text{THF-}d_8$ .

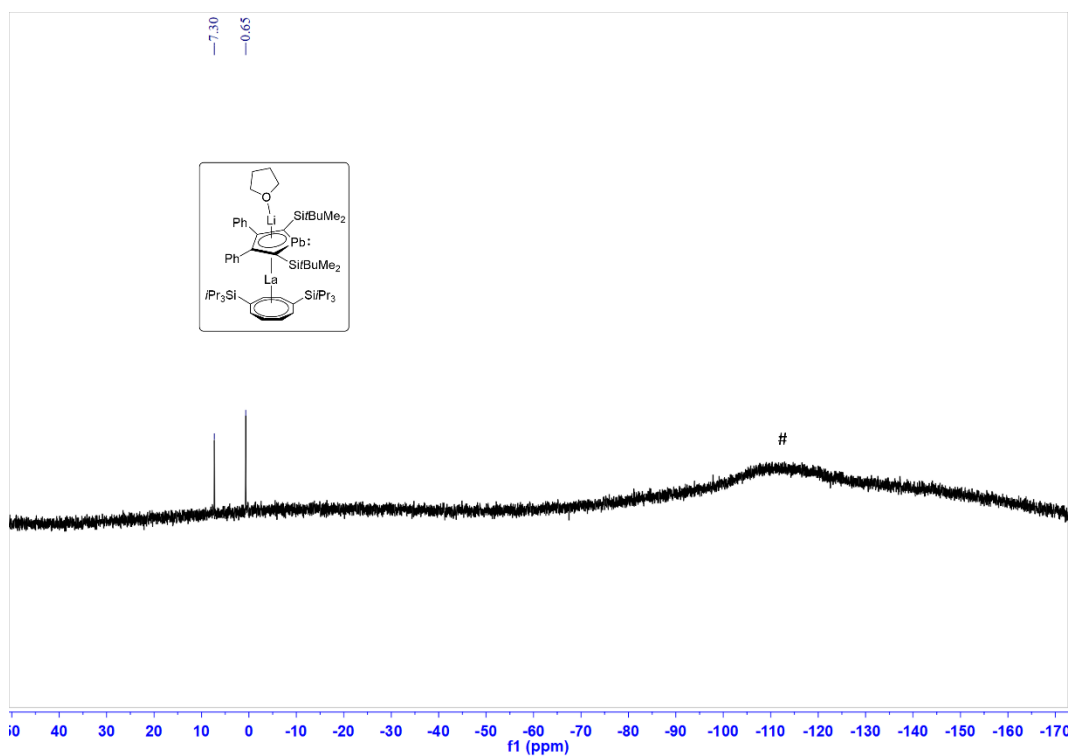

**Figure S19.**  ${}^{29}\text{Si}\{^1\text{H}\}$  NMR spectrum of  $[\text{Li}(\text{thf})(\eta^5\text{-L}^{\text{Pb}})\text{La}(\eta^8\text{-COT}^{\text{TIPS}})]$  (5) in  $\text{THF-}d_8$ : #, background signal from NMR tube (made of borosilicate glass).

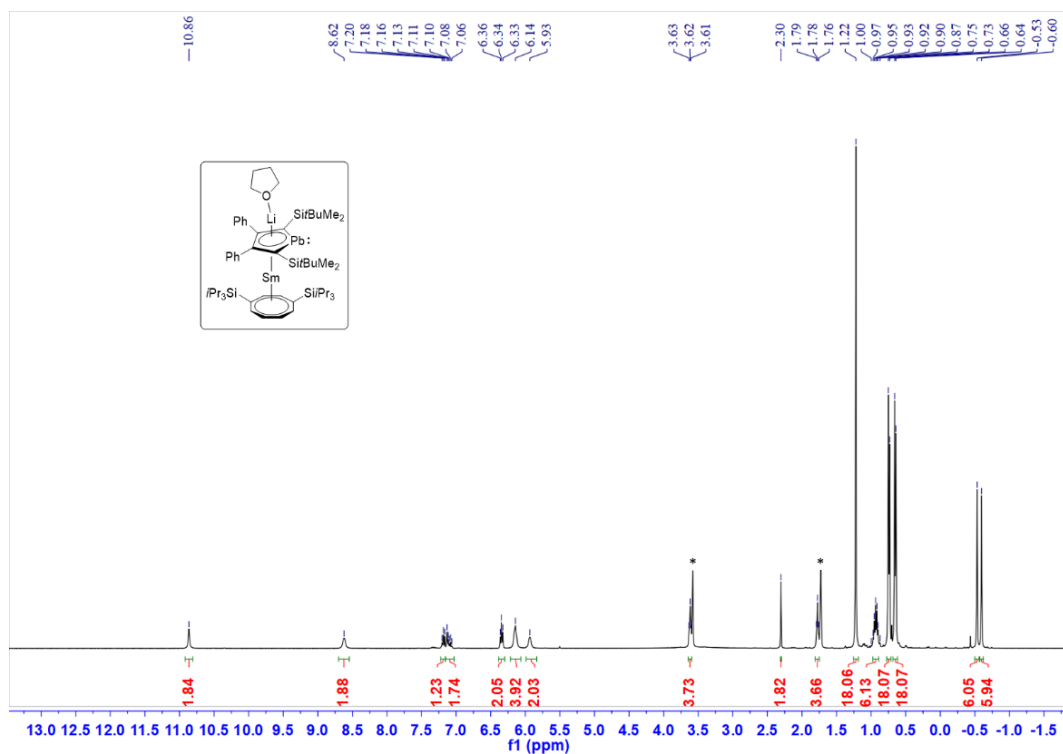

**Figure S20.**  $^1\text{H}$  NMR spectrum of  $[\text{Li}(\text{thf})(\eta^5\text{-L}^{\text{Pb}})\text{Sm}(\eta^8\text{-COT}^{\text{TIPS}})]$  (**6**) in THF- $d_8$ ; \*, residual protio solvent signal.

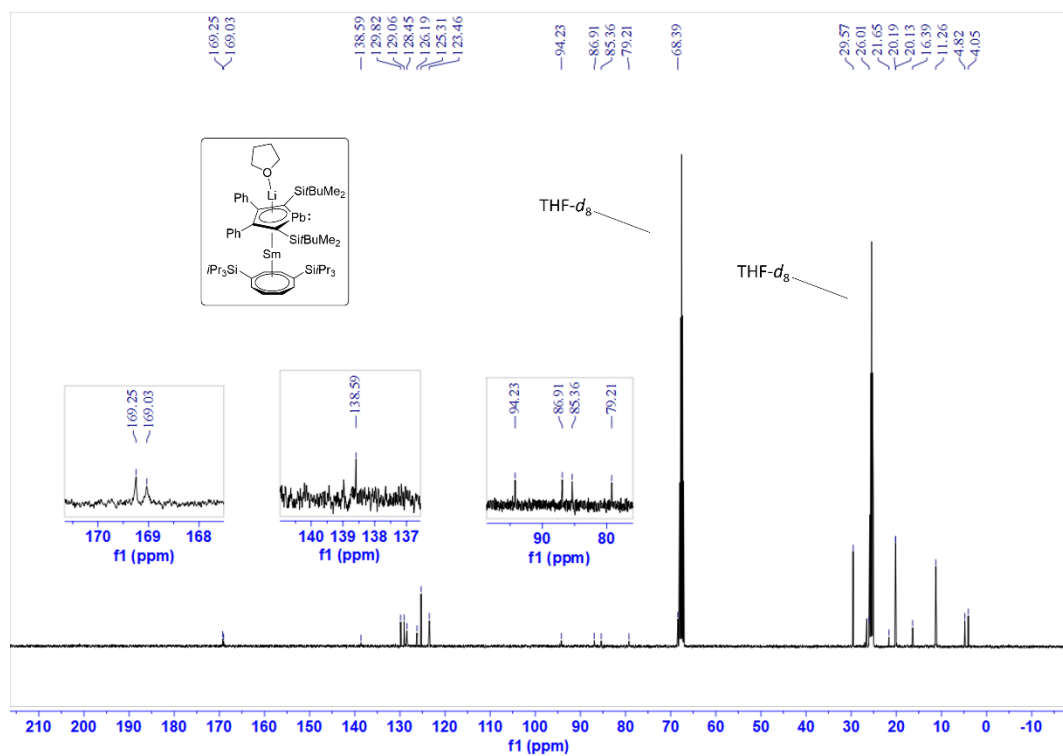

**Figure S21.**  $^{13}\text{C}\{^1\text{H}\}$  NMR spectrum of  $[\text{Li}(\text{thf})(\eta^5\text{-L}^{\text{Pb}})\text{Sm}(\eta^8\text{-COT}^{\text{TIPS}})]$  (**6**) in THF- $d_8$ .



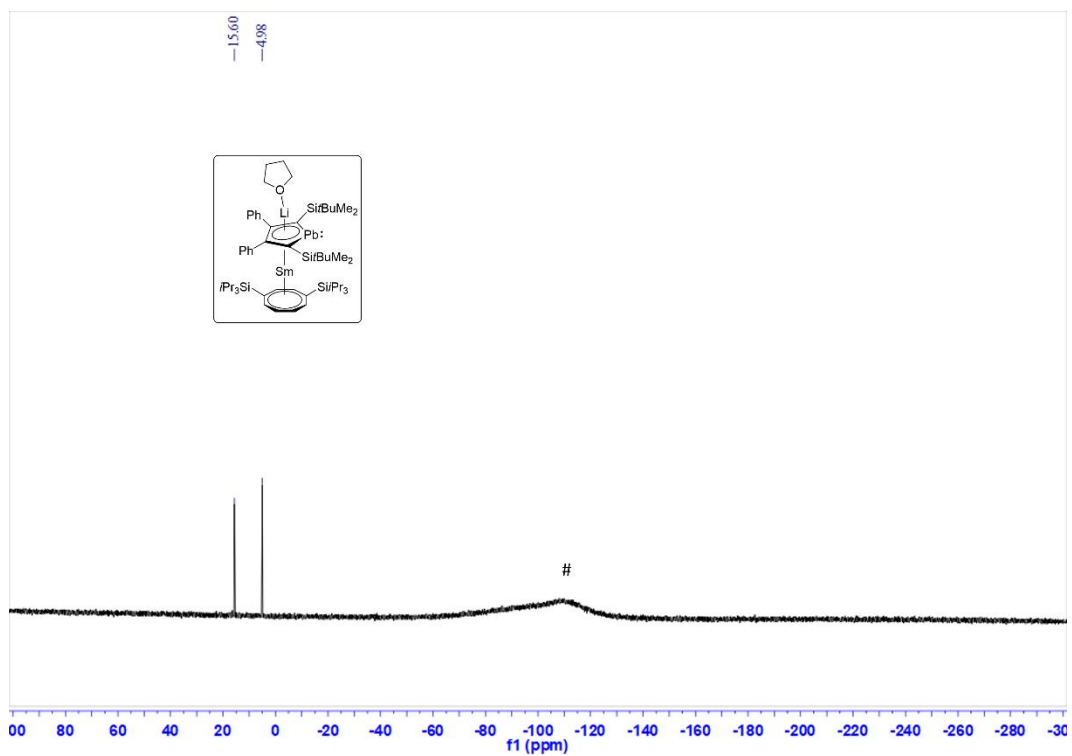

**Figure S22.**  $^{29}\text{Si}\{^1\text{H}\}$  NMR spectrum of  $[\text{Li}(\text{thf})(\eta^5\text{-L}^{\text{Pb}})\text{Sm}(\eta^8\text{-COTIPs})]$  (**6**) in  $\text{THF-}d_8$ : #, background signal from NMR tube (made of borosilicate glass).

## FT-Raman Spectra

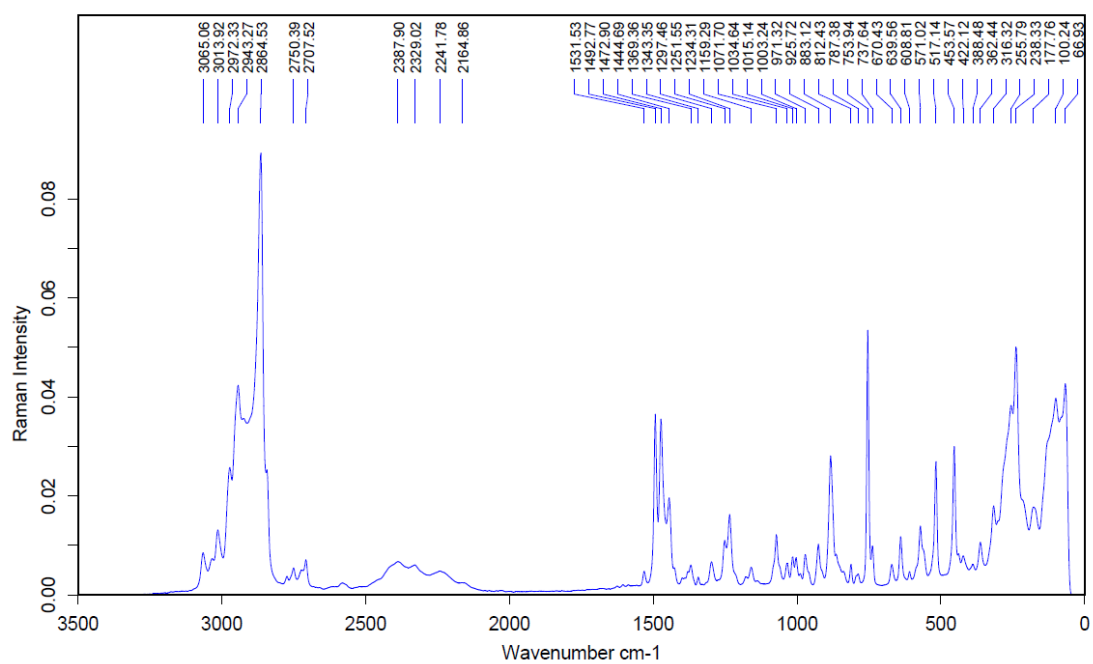

**Figure S23.** FT-Raman spectrum of  $[\text{La}(\eta^8\text{-COT}^{\text{TIPS}})\text{BH}_4]$  (**1**).

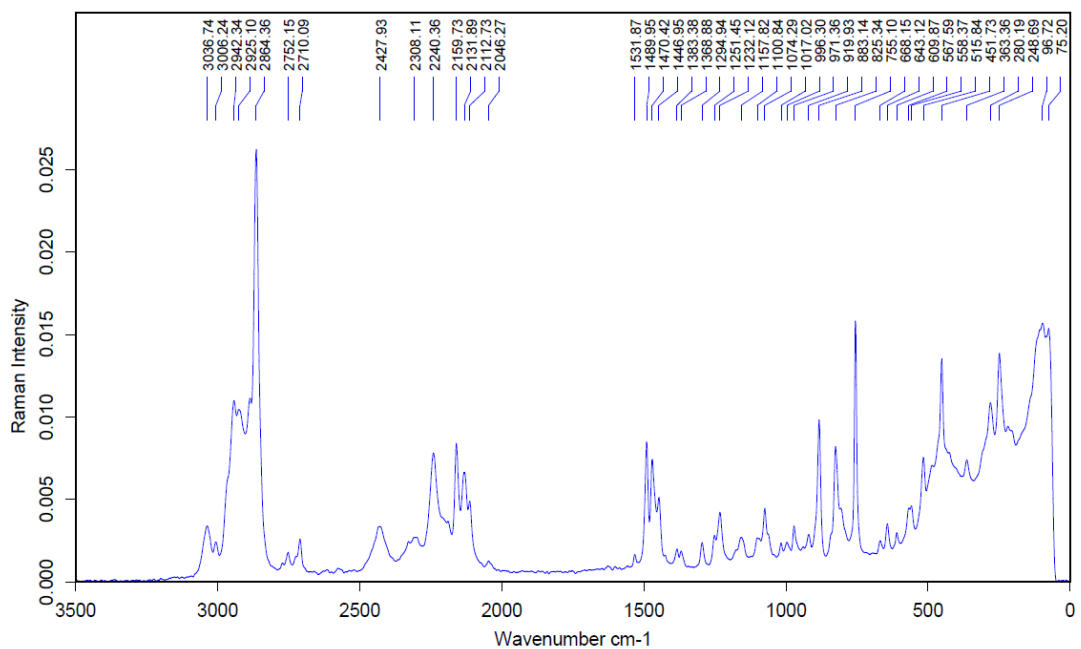

**Figure S24.** FT-Raman spectrum of  $[\text{Ce}(\eta^8\text{-COT}^{\text{TIPS}})\text{BH}_4]$  (**2**).

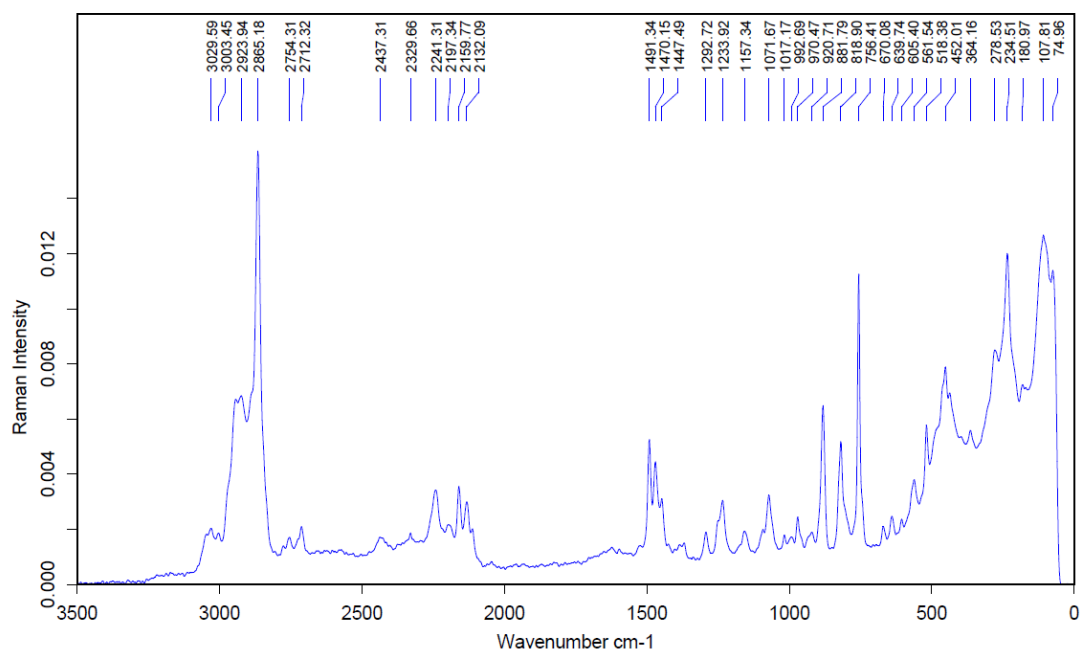

**Figure S25.** FT-Raman spectrum of  $[\text{Sm}(\eta^8\text{-COT}^{\text{TIPS}})\text{BH}_4]$  (**3**).

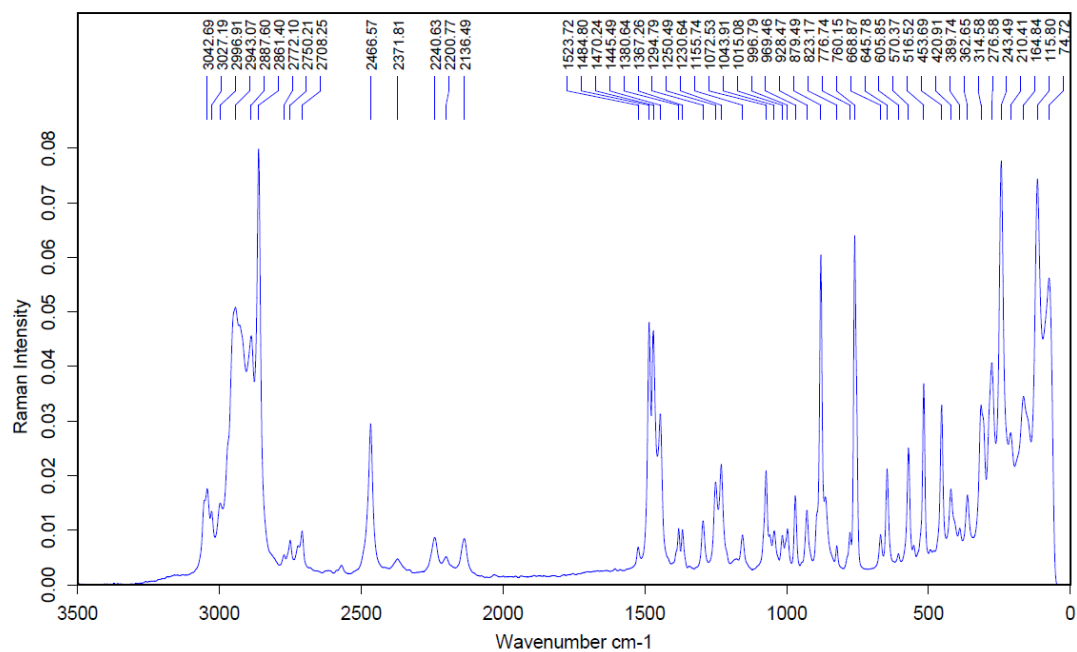

**Figure S26.** FT-Raman spectrum of  $[\text{Er}(\eta^8\text{-COT}^{\text{TIPS}})\text{BH}_4]$  (**4**).

## FT-IR Spectra

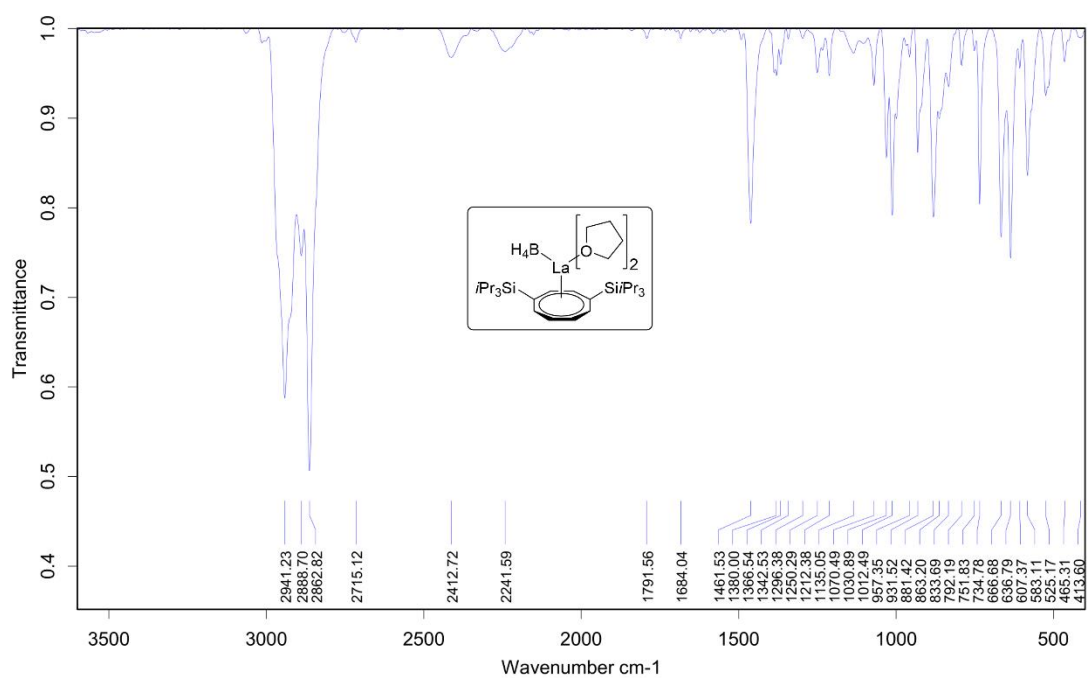

**Figure S27.** IR spectrum of  $[\text{La}(\eta^8\text{-COT}^{\text{TIPS}})\text{BH}_4]$  (1).

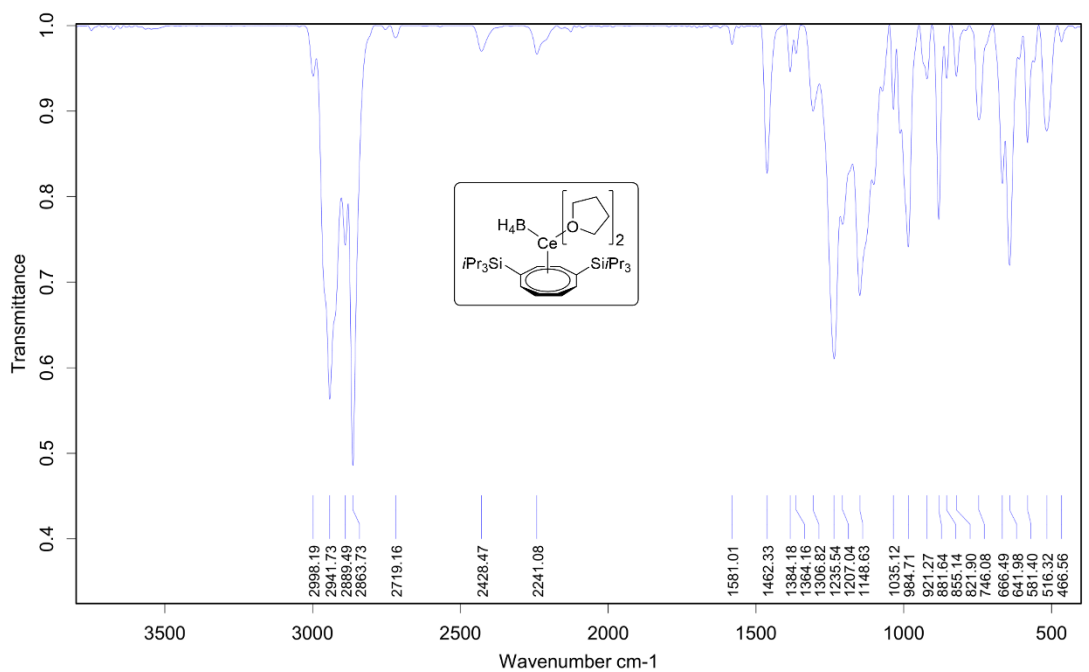

**Figure S28.** IR spectrum of  $[\text{Ce}(\eta^8\text{-COT}^{\text{TIPS}})\text{BH}_4]$  (2).

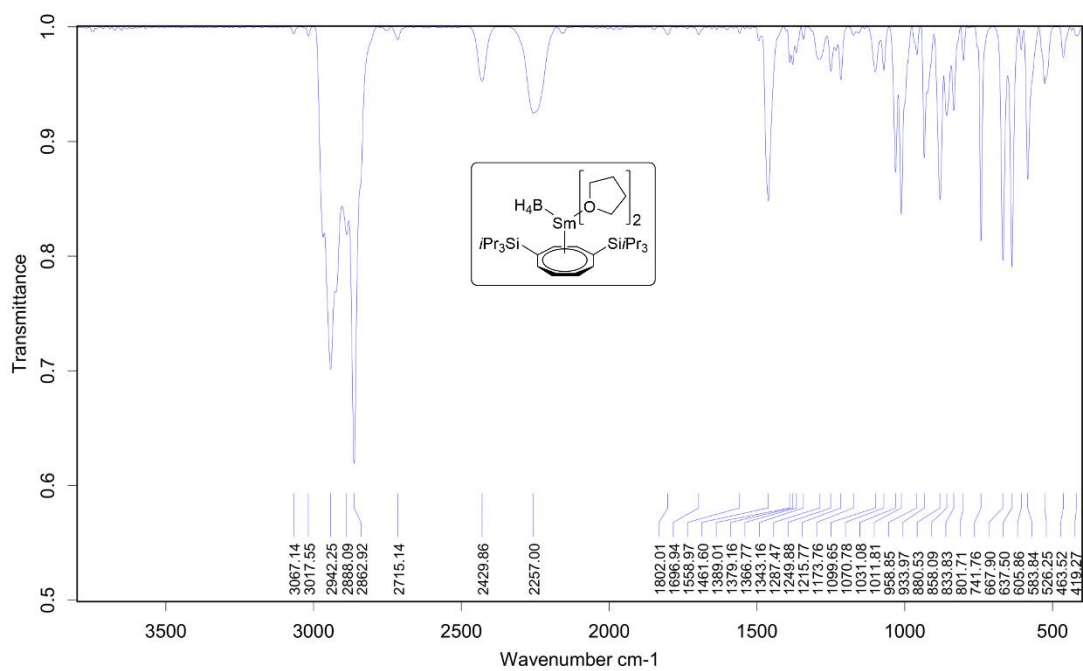

**Figure S29.** IR spectrum of  $[\text{Sm}(\eta^8\text{-COT}^{\text{TIPS}})\text{BH}_4]$  (**3**).

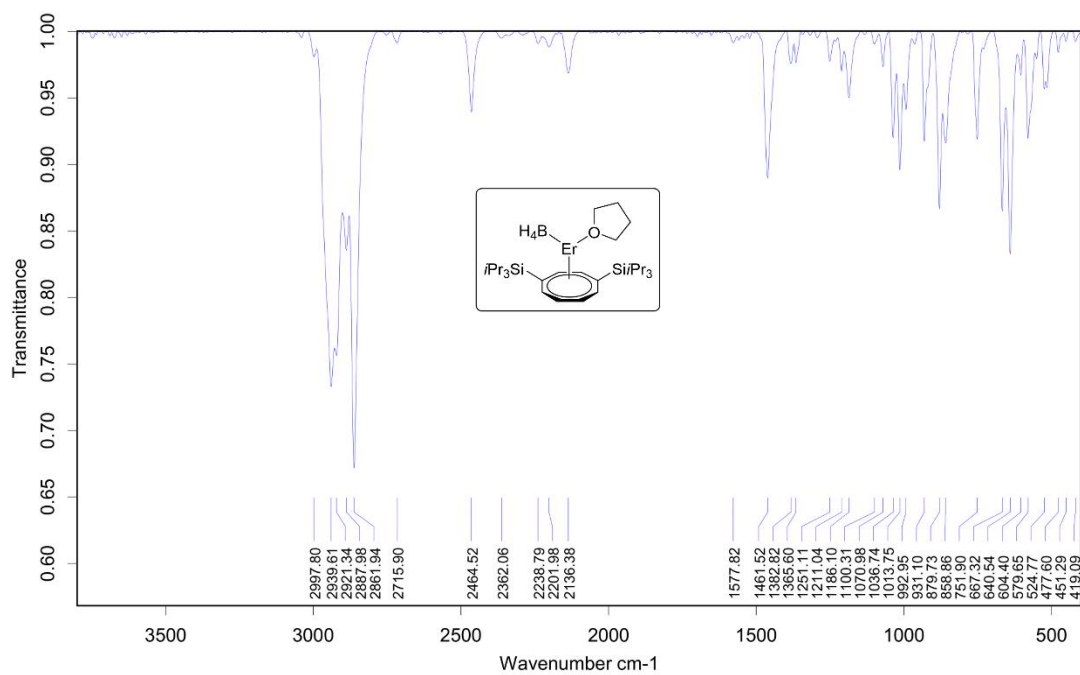

**Figure S30.** IR spectrum of  $[\text{Er}(\eta^8\text{-COT}^{\text{TIPS}})\text{BH}_4]$  (**4**).

The binding mode of borohydride ligands can readily be examined by vibrational spectroscopy. To support the end on  $\eta^3$ -binding mode elucidated by X-ray diffraction studies (*vide infra*), two distinct bands at approximately 2200  $\text{cm}^{-1}$  and 2400  $\text{cm}^{-1}$  are expected for the bridging and terminal hydrogen-boron bonds, respectively. The expected bands can be observed in Raman spectra of compounds **1-4** (Figure S23 - Figure S26). However, these signals overlap with other resonances, that cannot be unambiguously assigned without further support by calculations. These possibly arise from vibrational modes that are IR forbidden and not well described in literature. As expected, IR spectra of **1-4** solely feature above mentioned characteristic bands (Figure S27 - Figure S30). These are rather intense, do not overlap with further signals, and are found in a similar position compared to those observed in the Raman spectra (Table S1). Thus, the proposed  $\eta^3$ -binding mode of the borohydride ligands is validated by these findings.

**Table S1.** Comparison of IR and Raman resonances that are unambiguously assignable to vibrational modes of the borohydride ligands in compounds **1-4**.

| Compound | Wavenumber Raman [ $\text{cm}^{-1}$ ] |      | Wavenumber IR [ $\text{cm}^{-1}$ ] |      |
|----------|---------------------------------------|------|------------------------------------|------|
| <b>1</b> | 2388                                  | 2242 | 2413                               | 2242 |
| <b>2</b> | 2428                                  | 2240 | 2428                               | 2241 |
| <b>3</b> | 2437                                  | 2241 | 2430                               | 2257 |
| <b>4</b> | 2467                                  | 2136 | 2465                               | 2136 |

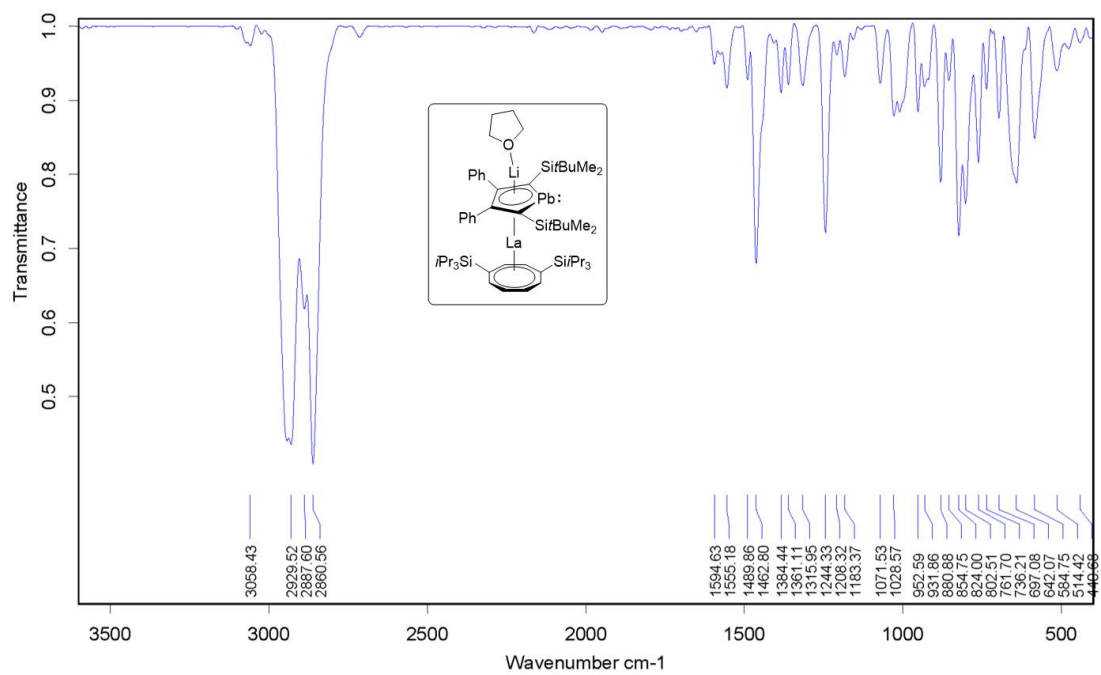

**Figure S31.** IR spectrum of [Li(thf)( $\eta^5\text{-L}^{\text{Pb}}$ )La( $\eta^8\text{-COT}^{\text{TIPS}}$ )] (5).

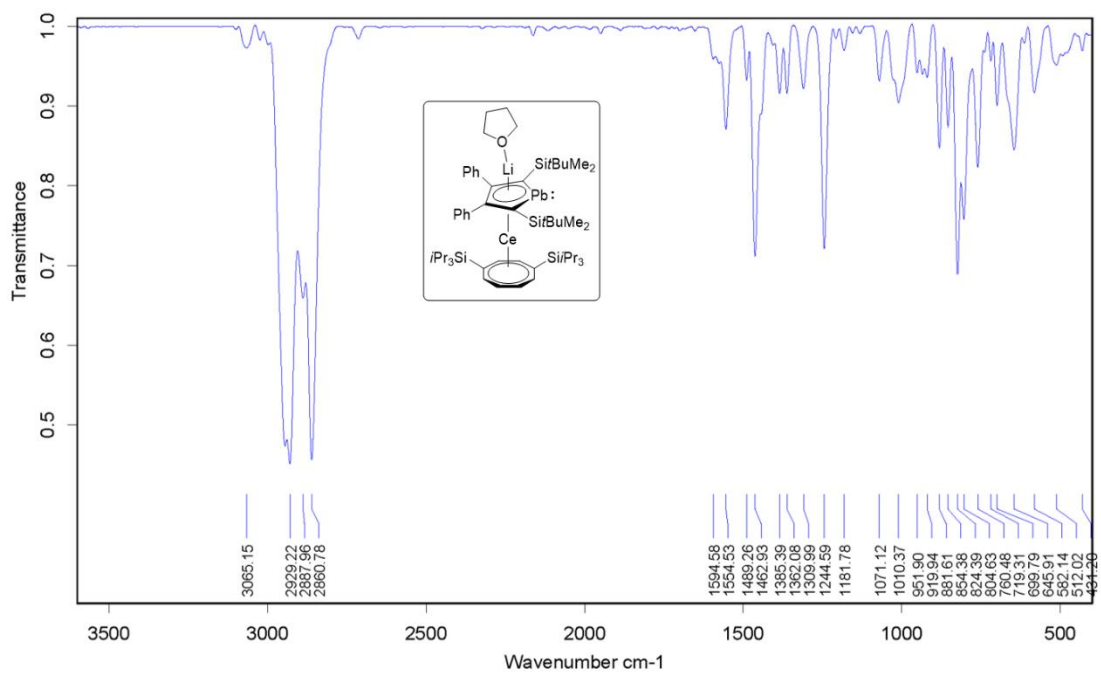

**Figure S32.** IR spectrum of [Li(thf)( $\eta^5\text{-L}^{\text{Pb}}$ )Ce( $\eta^8\text{-COT}^{\text{TIPS}}$ )] (6).





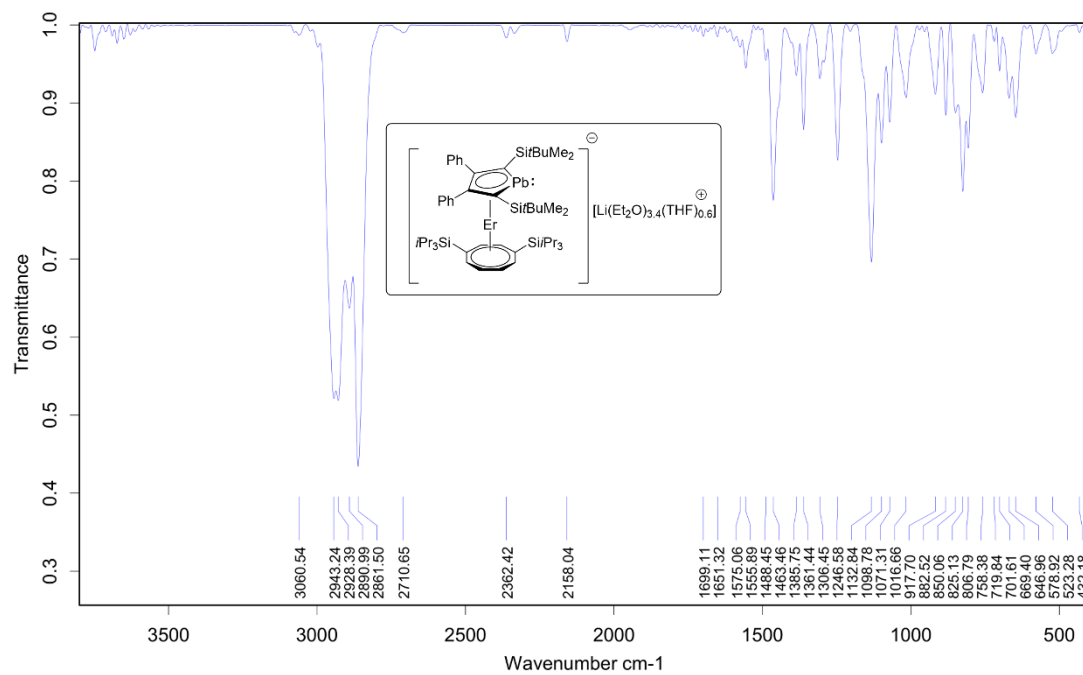

**Figure S35.** IR spectrum of  $[\text{Li}(\text{Et}_2\text{O})_{3.4}(\text{thf})_{0.6}][(\eta^5\text{-L}^{\text{Pb}})\text{Er}(\eta^8\text{-COTIPs})]$  (9).

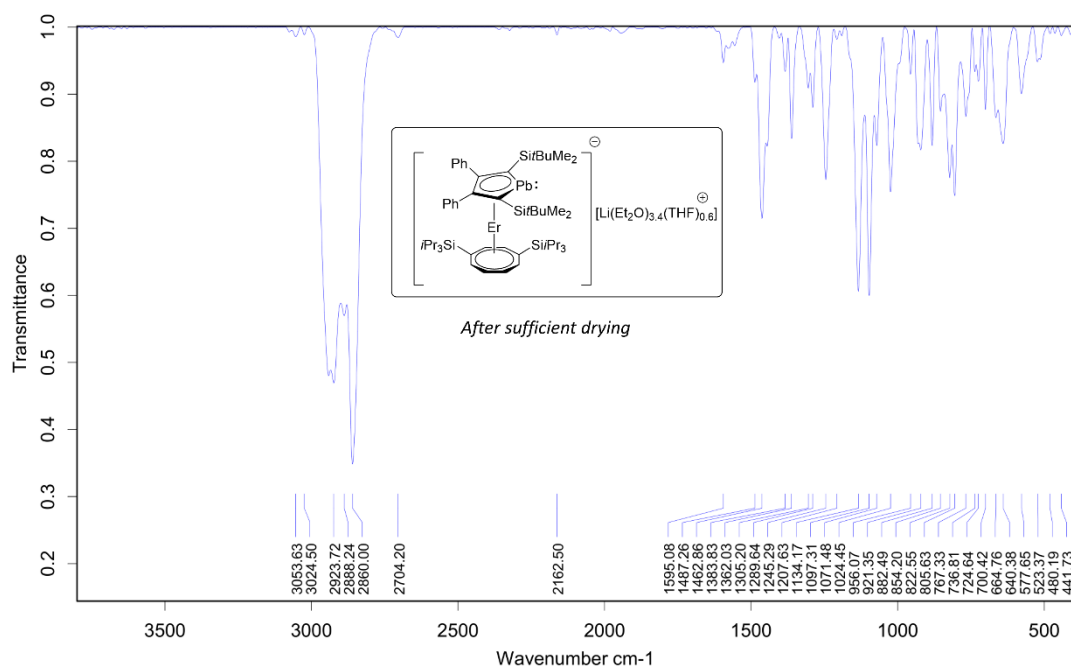

**Figure S36.** IR spectrum of  $[\text{Li}(\text{Et}_2\text{O})_{3.4}(\text{thf})_{0.6}][(\eta^5\text{-L}^{\text{Pb}})\text{Er}(\eta^8\text{-COTIPs})]$  (9) after sufficient drying under vacuum.

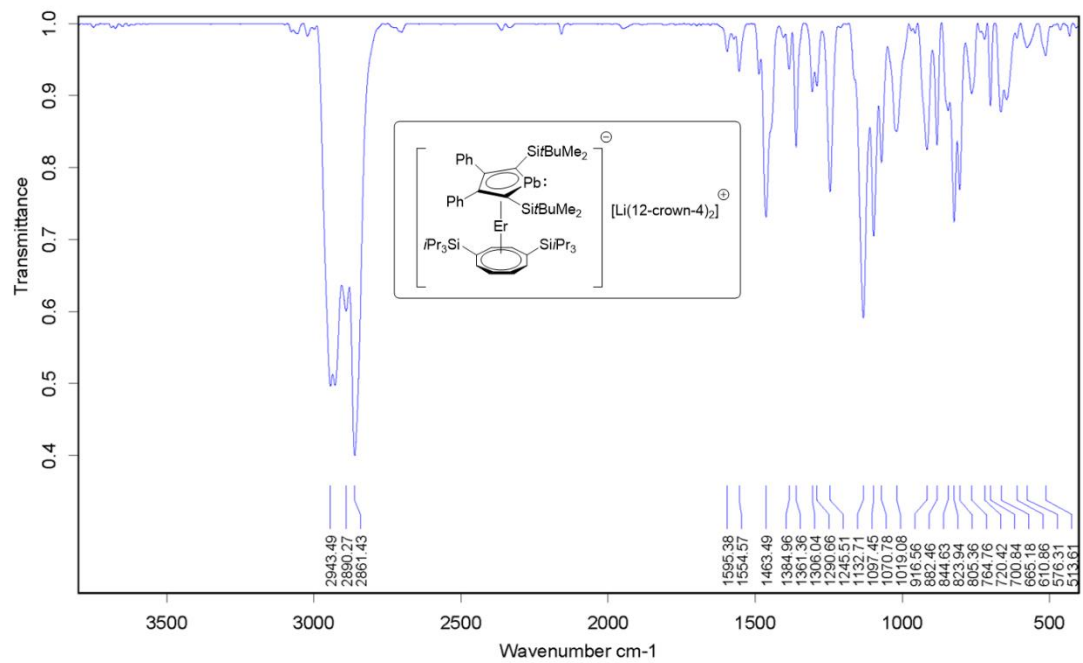

**Figure S37.** IR spectrum of  $[\text{Li}(\text{12-c-4})_2][(\eta^5\text{-LPb})\text{Er}(\eta^8\text{-COTTIPS})]$  (**10**).

## X-ray Crystallographic Studies

Suitable crystals were selected under an optic microscope equipped with polarizing filters, covered in mineral oil (Aldrich) and mounted on a *MiTeGen* holder. The crystals were transferred directly to the cold stream of a STOE IPDS 2 (150 K) or STOE StadiVari (100 K) diffractometer, equipped with a Mo-sealed tube, MoGenix 3D HF or a Ga-MetalJet X-ray source. All structures were solved using the programs SHELXS/T and Olex2 1.2.<sup>4,5,6</sup> The remaining non-hydrogen atoms were located from successive difference Fourier map calculations. The refinements were carried out by using full-matrix least-squares techniques on  $F^2$  by using the program SHELXL. In each case, the locations of the largest peaks in the final difference Fourier map calculations, as well as the magnitude of the residual electron densities, were of no chemical significance.

Specific comments on the structures discussed here are given below.

[La( $\eta^8$ -COT<sup>TIPS</sup>)BH<sub>4</sub>] (**1**): Crystals of **1** showed severe structural defects upon cooling to 100 K, most likely caused by a temperature induced phase transition. We attempted to omit this problem by elevating the cryostream temperature. However, cracks in the crystal were observed up to 273.15 K. A stable measurement could only be achieved at room temperature, where exceedingly large ADPs were observed. As a result, the obtained data will not be discussed here.

Cell found by SCXRD:

$a = 8.016 \text{ \AA}$

$b = 24.547 \text{ \AA}$

$c = 22.298 \text{ \AA}$

$\alpha = \gamma = 90^\circ$

$\beta = 89.728^\circ$

Ball and stick model to proof connectivity:

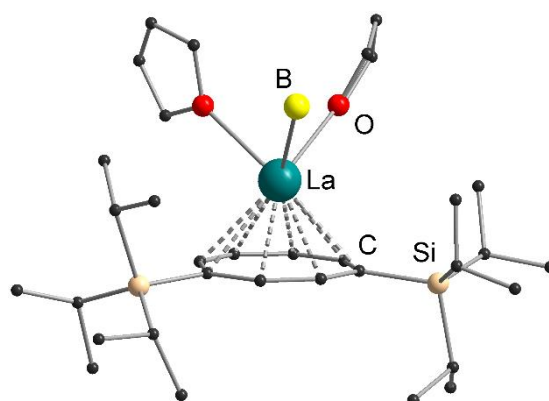

**Figure S38:** Ball and stick model of compound **1** as obtained by SCXRD measurement at room temperature. Due to very large ADPs under these conditions, no bond metrics and details will be given here.

[Er( $\eta^8$ -COT<sup>TIPS</sup>)BH<sub>4</sub>] (**4**): Compound **4** was solved and refined in the orthorhombic space group *Pnma*. The mirror plane, which goes through the center of the molecule, generates a positionally disordered THF ligand. To model the disordered moiety, SIMU, RIGU and SADI constraints were applied.

[Li(thf)( $\eta^5$ -L<sup>Pb</sup>)La( $\eta^8$ -COT<sup>TIPS</sup>)] (**5**): The crystal structure of **5** showed severe positional disorders of the Li-coordinated THF ligand, both phenyl rings, both TIPS groups and on TBDMS group. These were split in two parts with an approximate occupancy of 50% for both. Modelling of the disordered substituents was achieved with RIGU, SIMU, DELU and SADI restraints where appropriate. One disordered phenyl-carbon atom (C14a) was additionally restrained using ISOR. Interestingly, compounds **5**, **6** and **8** were best solved and refined in the acentric space group *P2*<sub>1</sub>, although no implications of chirality were observed. In contrast, **7** crystallized in the centric space group *P2*<sub>1</sub>/*n*. Here the possible reason might be the solvent choice. Complexes **5**, **6** and **8** were crystallized from *n*-heptane, while **7** was crystallized from toluene.

[Li(thf)( $\eta^5$ -L<sup>Pb</sup>)Ce( $\eta^8$ -COT<sup>TIPS</sup>)] (**6**): As described above, the crystal structure of **6** was solved and refined in the acentric space group *P2*<sub>1</sub>. Crystals of **6** were measured using a Gallium-jet X-ray source. Due to the experimental setup, reflections at high angles could not be measured, leading to a lower-than-expected Friedel-pair coverage and completeness. No measuring strategy that circumvents this problem could be found., despite several attempts.

[Li(thf)( $\eta^5$ -L<sup>Pb</sup>)Sm( $\eta^8$ -COT<sup>TIPS</sup>)] (**7**): As described above, the crystal structure of **7** was, in contrast to the structures of **5**, **6** and **8**, solved and refined in the centric space group *P2*<sub>1</sub>/*n*. The reason for this discrepancy most likely is the different solvent used for crystallization. The crystal structure of **7** contains one molecule of toluene per asymmetric unit.

[Li(thf)( $\eta^5$ -L<sup>Pb</sup>)Er( $\eta^8$ -COT<sup>TIPS</sup>)] (**8**): As described above, the crystal structure of **8** was solved and refined in the acentric space group *P2*<sub>1</sub>. Compare [Li(thf)( $\eta^5$ -L<sup>Pb</sup>)La( $\eta^8$ -COT<sup>TIPS</sup>)] (**5**).

[Li(Et<sub>2</sub>O)<sub>3.4</sub>(thf)<sub>0.6</sub>][( $\eta^5$ -L<sup>Pb</sup>)Er( $\eta^8$ -COT<sup>TIPS</sup>)] (**9**): The crystal structure of **9** shows a charge separated species comprising a Et<sub>2</sub>O solvated Li-cation. However, careful consideration of the residual electron density in the coordination sphere of the cation led to the assumption that one Et<sub>2</sub>O position is mixed with a molecule of THF in a ratio of 40:60. The half-occupied ligand moieties were modelled with SIMU, RIGU and DELU restraints.

Alert level B:

PROBLEM: Check Calcd Resid. Dens. 0.80A From Pb1 -2.85 eA-3

RESPONSE: truncation error

[Li(12-c-4)<sub>2</sub>][( $\eta^5$ -L<sup>Pb</sup>)Er( $\eta^8$ -COT<sup>TIPS</sup>)] (**10**): In the crystal structure of **10** the Li-cation is located on two special positions on two opposing sides of the central [( $\eta^5$ -L<sup>Pb</sup>)Er( $\eta^8$ -COT<sup>TIPS</sup>)]-anion. Both positions are half-occupied. Accordingly, the 12-c-4 ligands coordinating to the Li-cation show a positional disorder with a ratio of 50:50. The asymmetric unit also contains a half molecule of toluene, which could not be modelled satisfactorily. Therefore, the correlated electron density was removed from the electron density map using the solvent mask of Olex2.<sup>6</sup>

Crystallographic data for the structures reported in this paper have been deposited with the Cambridge Crystallographic Data Centre as a supplementary publication no. 2067569-2067577. Copies of the data can be obtained free of charge on application to CCDC, 12 Union Road, Cambridge CB21EZ, UK (fax: +(44)1223-336-033; email: [deposit@ccdc.cam.ac.uk](mailto:deposit@ccdc.cam.ac.uk)).

**Table S2.** Crystal data and structure refinement for compounds **2-5**.

| Compound                                      | <b>2</b>                                                          | <b>3</b>                                                           | <b>4</b>                                            | <b>5</b>                                               |
|-----------------------------------------------|-------------------------------------------------------------------|--------------------------------------------------------------------|-----------------------------------------------------|--------------------------------------------------------|
| Formula                                       | C <sub>34</sub> H <sub>68</sub> BCeO <sub>2</sub> Si <sub>2</sub> | C <sub>34</sub> H <sub>68</sub> BO <sub>2</sub> Si <sub>2</sub> Sm | C <sub>30</sub> H <sub>60</sub> BErOSi <sub>2</sub> | C <sub>58</sub> H <sub>97</sub> LaLiOPbSi <sub>4</sub> |
| <i>D</i> <sub>calc.</sub> /g cm <sup>-3</sup> | 1.247                                                             | 1.268                                                              | 1.325                                               | 1.384                                                  |
| <i>m</i> /mm <sup>-1</sup>                    | 1.283                                                             | 1.633                                                              | 2.586                                               | 3.547                                                  |
| Formula Weight                                | 715.99                                                            | 726.22                                                             | 671.03                                              | 1275.75                                                |
| Color                                         | clear yellow                                                      | clear violet                                                       | clear pink                                          | clear orange                                           |
| Shape                                         | block                                                             | block                                                              | irregular                                           | rod                                                    |
| Size/mm <sup>3</sup>                          | 0.63×0.38×0.23                                                    | 0.35×0.28×0.17                                                     | 0.48×0.34×0.09                                      | 0.67×0.34×0.09                                         |
| <i>T</i> /K                                   | 100                                                               | 150                                                                | 150                                                 | 100                                                    |
| Crystal System                                | monoclinic                                                        | monoclinic                                                         | orthorhombic                                        | monoclinic                                             |
| Space Group                                   | <i>P</i> 2 <sub>1</sub> / <i>c</i>                                | <i>P</i> 2 <sub>1</sub> / <i>c</i>                                 | <i>Pnma</i>                                         | <i>P</i> 2 <sub>1</sub>                                |
| <i>a</i> /Å                                   | 7.4686(5)                                                         | 7.5051(3)                                                          | 15.8956(3)                                          | 13.4752(3)                                             |
| <i>b</i> /Å                                   | 26.405(2)                                                         | 26.3267(9)                                                         | 24.9080(5)                                          | 13.6204(2)                                             |
| <i>c</i> /Å                                   | 19.5200(11)                                                       | 19.4417(8)                                                         | 8.4943(7)                                           | 16.9090(4)                                             |
| $\alpha$ /°                                   |                                                                   |                                                                    |                                                     |                                                        |
| $\beta$ /°                                    | 97.925(5)                                                         | 98.004(3)                                                          |                                                     | 99.420(2)                                              |
| $\gamma$ /°                                   |                                                                   |                                                                    |                                                     |                                                        |
| <i>V</i> /Å <sup>3</sup>                      | 3812.7(5)                                                         | 3804.0(3)                                                          | 3363.1(3)                                           | 3061.59(11)                                            |
| <i>Z</i>                                      | 4                                                                 | 4                                                                  | 4                                                   | 2                                                      |
| <i>Z'</i>                                     | 1                                                                 | 1                                                                  | 0.5                                                 | 1                                                      |
| Wavelength/Å                                  | 0.71073                                                           | 0.71073                                                            | 0.71073                                             | 0.71073                                                |
| Radiation type                                | MoK $\alpha$                                                      | MoK $\alpha$                                                       | MoK $\alpha$                                        | MoK $\alpha$                                           |
| <i>Q</i> <sub>min</sub> /                     | 2.860                                                             | 1.310                                                              | 2.533                                               | 1.532                                                  |
| <i>Q</i> <sub>max</sub> /                     | 29.596                                                            | 26.701                                                             | 26.371                                              | 30.073                                                 |
| Measured Refl.                                | 20247                                                             | 17774                                                              | 18104                                               | 52341                                                  |
| Independent Refl.                             | 9388                                                              | 7993                                                               | 3514                                                | 15998                                                  |
| Reflections with <i>I</i> > 2( <i>I</i> )     | 7658                                                              | 6251                                                               | 2931                                                | 14247                                                  |
| <i>R</i> <sub>int</sub>                       | 0.0370                                                            | 0.0399                                                             | 0.0239                                              | 0.0450                                                 |
| Parameters                                    | 389                                                               | 389                                                                | 212                                                 | 939                                                    |
| Restraints                                    | 0                                                                 | 0                                                                  | 66                                                  | 357                                                    |
| Largest Peak                                  | 0.842                                                             | 0.987                                                              | 0.777                                               | 1.791                                                  |
| Deepest Hole                                  | -0.867                                                            | -3.387                                                             | -0.313                                              | -1.624                                                 |
| GooF                                          | 0.977                                                             | 1.021                                                              | 0.991                                               | 1.035                                                  |
| <i>wR</i> <sub>2</sub> (all data)             | 0.0898                                                            | 0.1380                                                             | 0.0599                                              | 0.1242                                                 |
| <i>wR</i> <sub>2</sub>                        | 0.0866                                                            | 0.1335                                                             | 0.0591                                              | 0.1169                                                 |
| <i>R</i> <sub>1</sub> (all data)              | 0.0441                                                            | 0.0622                                                             | 0.0279                                              | 0.0591                                                 |
| <i>R</i> <sub>1</sub>                         | 0.0346                                                            | 0.0510                                                             | 0.0232                                              | 0.0490                                                 |
| Flack Parameter                               | -                                                                 | -                                                                  | -                                                   | -0.004(4)                                              |
| Hooft Parameter                               | -                                                                 | -                                                                  | -                                                   | -0.0274(14)                                            |

**Table S3.** Crystal data and structure refinement for compounds **6-10**.

| Compound                                       | <b>6</b>                                               | <b>7</b>                                                 | <b>8</b>                                               | <b>9</b>                                                                | <b>10</b>                                                               |
|------------------------------------------------|--------------------------------------------------------|----------------------------------------------------------|--------------------------------------------------------|-------------------------------------------------------------------------|-------------------------------------------------------------------------|
| Formula                                        | C <sub>58</sub> H <sub>96</sub> CeLiOPbSi <sub>4</sub> | C <sub>65</sub> H <sub>104</sub> LiOPbSi <sub>4</sub> Sm | C <sub>58</sub> H <sub>96</sub> ErLiOPbSi <sub>4</sub> | C <sub>70</sub> H <sub>126.8</sub> ErLiO <sub>4</sub> PbSi <sub>4</sub> | C <sub>73.5</sub> ErH <sub>124</sub> LiO <sub>8</sub> PbSi <sub>4</sub> |
| <i>D</i> <sub>calc.</sub> / g cm <sup>-3</sup> | 1.391                                                  | 1.372                                                    | 1.466                                                  | 1.353                                                                   | 1.379                                                                   |
| <i>m</i> /mm <sup>-1</sup>                     | 8.124                                                  | 3.499                                                    | 4.378                                                  | 3.462                                                                   | 3.315                                                                   |
| Formula Weight                                 | 1275.95                                                | 1378.32                                                  | 1303.09                                                | 1526.26                                                                 | 1629.47                                                                 |
| Color                                          | clear orange                                           | clear orange                                             | clear orange                                           | clear red                                                               | clear red                                                               |
| Shape                                          | needle                                                 | plate                                                    | rod                                                    | block                                                                   | plate                                                                   |
| Size/mm <sup>3</sup>                           | 0.87×0.55×0.32                                         | 0.69×0.40×0.10                                           | 0.38×0.19×0.08                                         | 0.78×0.60×0.40                                                          | 0.20×0.15×0.05                                                          |
| <i>T</i> /K                                    | 150                                                    | 150                                                      | 100                                                    | 100                                                                     | 100                                                                     |
| Crystal System                                 | monoclinic                                             | monoclinic                                               | monoclinic                                             | monoclinic                                                              | triclinic                                                               |
| Space Group                                    | <i>P</i> 2 <sub>1</sub>                                | <i>P</i> 2 <sub>1</sub> / <i>n</i>                       | <i>P</i> 2 <sub>1</sub>                                | <i>P</i> 2 <sub>1</sub> / <i>n</i>                                      | <i>P</i> $\bar{1}$                                                      |
| <i>a</i> /Å                                    | 13.4211(2)                                             | 13.5678(8)                                               | 13.3164(4)                                             | 22.0069(7)                                                              | 13.1318(10)                                                             |
| <i>b</i> /Å                                    | 13.6559(2)                                             | 13.7727(5)                                               | 13.3190(3)                                             | 16.3287(4)                                                              | 13.3996(16)                                                             |
| <i>c</i> /Å                                    | 16.7671(3)                                             | 35.796(2)                                                | 16.7792(6)                                             | 22.8084(7)                                                              | 24.0543(14)                                                             |
| $\alpha$ /°                                    |                                                        |                                                          |                                                        |                                                                         | 90.114(7)                                                               |
| $\beta$ /°                                     | 97.5760(10)                                            | 93.725(5)                                                | 97.425(3)                                              | 113.880(2)                                                              | 99.276(5)                                                               |
| $\gamma$ /°                                    |                                                        |                                                          |                                                        |                                                                         | 109.783(8)                                                              |
| <i>V</i> /Å <sup>3</sup>                       | 3046.20(8)                                             | 6674.8(6)                                                | 2951.02(15)                                            | 7494.4(4)                                                               | 3923.4(6)                                                               |
| <i>Z</i>                                       | 2                                                      | 4                                                        | 2                                                      | 4                                                                       | 2                                                                       |
| <i>Z</i> '                                     | 1                                                      | 1                                                        | 1                                                      | 1                                                                       | 1                                                                       |
| Wavelength/Å                                   | 1.34143                                                | 0.71073                                                  | 0.71073                                                | 0.71073                                                                 | 0.71073                                                                 |
| Radiation type                                 | GaK $\alpha$                                           | MoK $\alpha$                                             | MoK $\alpha$                                           | MoK $\alpha$                                                            | MoK $\alpha$                                                            |
| <i>Q</i> <sub>min</sub> /°                     | 2.313                                                  | 1.140                                                    | 1.959                                                  | 1.584                                                                   | 1.878                                                                   |
| <i>Q</i> <sub>max</sub> /°                     | 64.042                                                 | 25.061                                                   | 31.506                                                 | 30.184                                                                  | 30.336                                                                  |
| Measured Refl.                                 | 36517                                                  | 26635                                                    | 48486                                                  | 41204                                                                   | 46121                                                                   |
| Independent Refl.                              | 10731                                                  | 11719                                                    | 16698                                                  | 18594                                                                   | 19762                                                                   |
| Reflections with <i>I</i> > 2( <i>I</i> )      | 10291                                                  | 9865                                                     | 13996                                                  | 14645                                                                   | 16136                                                                   |
| <i>R</i> <sub>int</sub>                        | 0.0208                                                 | 0.0285                                                   | 0.0381                                                 | 0.0557                                                                  | 0.0208                                                                  |
| Parameters                                     | 646                                                    | 681                                                      | 617                                                    | 796                                                                     | 935                                                                     |
| Restraints                                     | 73                                                     | 0                                                        | 1                                                      | 54                                                                      | 0                                                                       |
| Largest Peak                                   | 0.910                                                  | 1.498                                                    | 0.968                                                  | 2.076                                                                   | 0.951                                                                   |
| Deepest Hole                                   | -1.654                                                 | -0.791                                                   | -0.944                                                 | -2.910                                                                  | -0.701                                                                  |
| GooF                                           | 1.116                                                  | 0.997                                                    | 0.949                                                  | 1.015                                                                   | 1.043                                                                   |
| <i>wR</i> <sub>2</sub> (all data)              | 0.0797                                                 | 0.0746                                                   | 0.0677                                                 | 0.1214                                                                  | 0.0608                                                                  |
| <i>wR</i> <sub>2</sub>                         | 0.0780                                                 | 0.0728                                                   | 0.0642                                                 | 0.1128                                                                  | 0.0576                                                                  |
| <i>R</i> <sub>1</sub> (all data)               | 0.0324                                                 | 0.0362                                                   | 0.0495                                                 | 0.0636                                                                  | 0.0397                                                                  |
| <i>R</i> <sub>1</sub>                          | 0.0307                                                 | 0.0296                                                   | 0.0358                                                 | 0.0456                                                                  | 0.0269                                                                  |
| Flack Parameter                                | 0.018(3)                                               | -                                                        | -0.019(3)                                              | -                                                                       | -                                                                       |
| Hooft Parameter                                | 0.0133(10)                                             | -                                                        | -0.026(2)                                              | -                                                                       | -                                                                       |

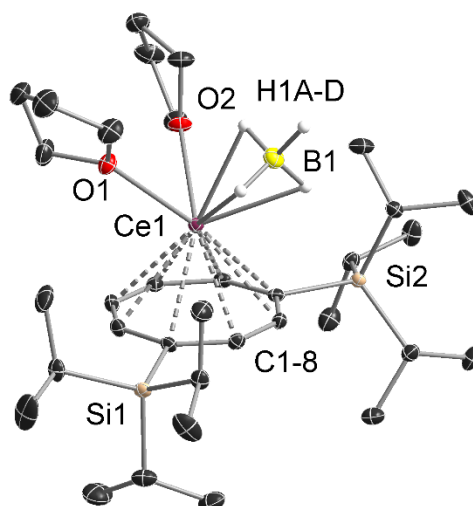

**Figure S39.** Molecular structure of **2** in the solid state. Thermal ellipsoids are represented at 50% probability. Hydrogen atoms except the freely refined hydridic ones are omitted for clarity. For selected bond lengths and angles see Table S4.

**Table S4.** Selected bond lengths and angles for  $[\text{Ce}(\eta^8\text{-COT}^{\text{TIPS}})\text{BH}_4]$  (**2**); Ct = Centroid of the subscript ring moiety.

| Length/Å                  |                   | Angle/°                       |           |
|---------------------------|-------------------|-------------------------------|-----------|
| Ce1-Ct <sub>COTTIPS</sub> | 1.973(4)          | Ct <sub>COTTIPS</sub> -Ce1-B1 | 135.29(7) |
| Ce1-C <sub>COTTIPS</sub>  | 2.673(2)-2.728(2) | Ct <sub>COTTIPS</sub> -Ce1-O1 | 130.04(4) |
| Ce1-B1                    | 2.720(3)          | Ct <sub>COTTIPS</sub> -Ce1-O2 | 122.52(4) |
| Ce1-O1                    | 2.551(2)          |                               |           |
| Ce1-O2                    | 2.590(2)          |                               |           |



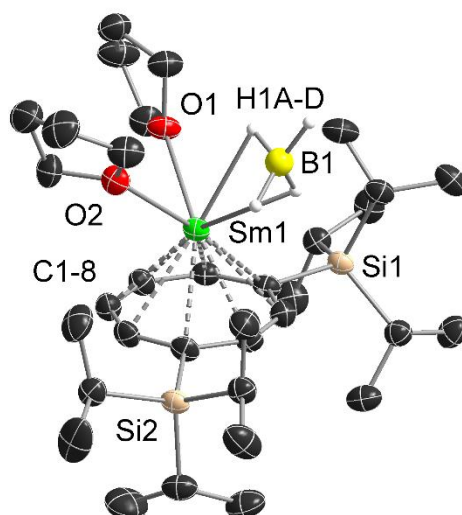

**Figure S40.** Molecular structure of **3** in the solid state. Thermal ellipsoids are represented at 50% probability. Hydrogen atoms except the freely refined hydridic ones are omitted for clarity. For selected bond lengths and angles see Table S5.

**Table S5.** Selected bond lengths and angles for  $[\text{Sm}(\eta^8\text{-COT}^{\text{TIPS}})\text{BH}_4]$  (**3**); Ct = Centroid of the subscript ring moiety

| Length/Å                  |                   | Angle/°                        |            |
|---------------------------|-------------------|--------------------------------|------------|
| Sm1-Ct <sub>COTTIPS</sub> | 1.887(4)          | Ct <sub>COTTIPS</sub> - Sm1-B1 | 135.57(13) |
| Sm1-C <sub>COTTIPS</sub>  | 2.637(4)-2.667(4) | Ct <sub>COTTIPS</sub> - Sm1-O1 | 123.05(7)  |
| Sm1-B1                    | 2.606(5)          | Ct <sub>COTTIPS</sub> - Sm1-O2 | 129.03(7)  |
| Sm1-O1                    | 2.536(3)          |                                |            |
| Sm1-O2                    | 2.487(3)          |                                |            |

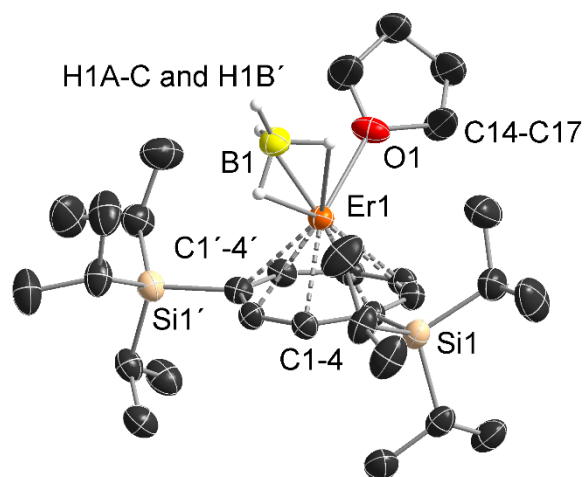

**Figure S41.** Molecular structure of **4** in the solid state. Thermal ellipsoids are represented at 50% probability. Hydrogen atoms except the freely refined hydridic ones are omitted for clarity. Only one part of the symmetry generated, disordered THF ligand is depicted. For selected bond lengths and angles see Table S6.

**Table S6.** Selected bond lengths and angles for  $[\text{Er}(\eta^8\text{-COT}^{\text{TIPS}})\text{BH}_4]$  (**4**); Ct = Centroid of the subscript ring moiety

| Length/Å                  |                   | Angle/°                       |            |
|---------------------------|-------------------|-------------------------------|------------|
| Er1-Ct <sub>COTTIPS</sub> | 1.725(1)          | Ct <sub>COTTIPS</sub> -Er1-B1 | 147.41(10) |
| Er1-C <sub>COTTIPS</sub>  | 2.503(3)-2.564(3) | Ct <sub>COTTIPS</sub> -Er1-O1 | 124.97(6)  |
| Er1-B1                    | 2.489(4)          |                               |            |
| Er1-O1                    | 2.347(3)          |                               |            |

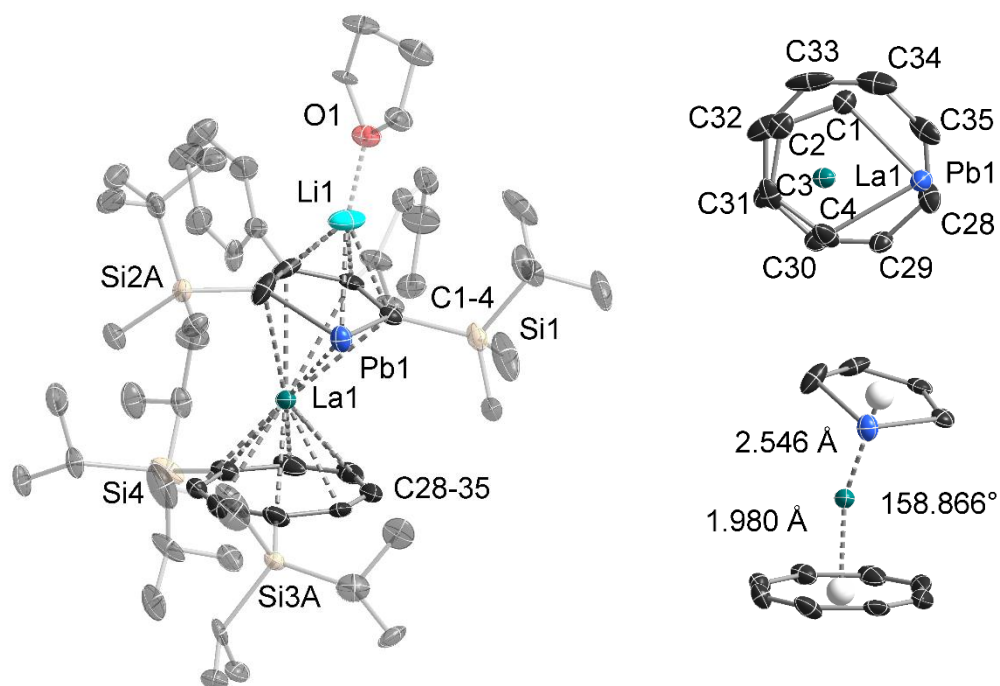

**Figure S42.** Left: Molecular structure of **5** in the solid state. Thermal ellipsoids are represented at 50% probability. Hydrogen atoms are omitted for clarity. Only one part of the disordered TIPS-, TBDMS- and Phenyl-groups and THF ligand is depicted. For selected bond lengths and angles see Table S7. Top right: Top view of the central complex fragment. Bottom right: Front view of the central complex fragment with La1-Ct distances (left) and Ct-La1-Ct angle (right).

**Table S7.** Selected bond lengths and angles for  $[\text{Li}(\text{thf})(\eta^5\text{-L}^{\text{Pb}})\text{La}(\eta^8\text{-COT}^{\text{TIPS}})]$  (**5**); Ct = Centroid of the subscript ring moiety

| Length/Å                  |                     | Angle/°                                      |            |
|---------------------------|---------------------|----------------------------------------------|------------|
| La1-Ct <sub>COTTIPS</sub> | 1.9804(4)           | Ct <sub>COTTIPS</sub> -La1-Ct <sub>LPb</sub> | 147.41(10) |
| La1-Ct <sub>LPb</sub>     | 2.5464(4)           | La1-Ct <sub>LPb</sub> -Li1                   | 158.87(6)  |
| Li1-Ct <sub>LPb</sub>     | 1.80(2)             | Angle sum COT <sup>TIPS</sup>                | 1079.0     |
| La1-Pb1                   | 3.3530(6)           | Angle sum L <sup>Pb</sup>                    | 539.8      |
| La1-C <sub>COTTIPS</sub>  | 2.668(11)-2.783(10) |                                              |            |
| La1-C <sub>LPb</sub>      | 2.762(9)-2.953(8)   |                                              |            |
| Li1-O1                    | 1.87(2)             |                                              |            |

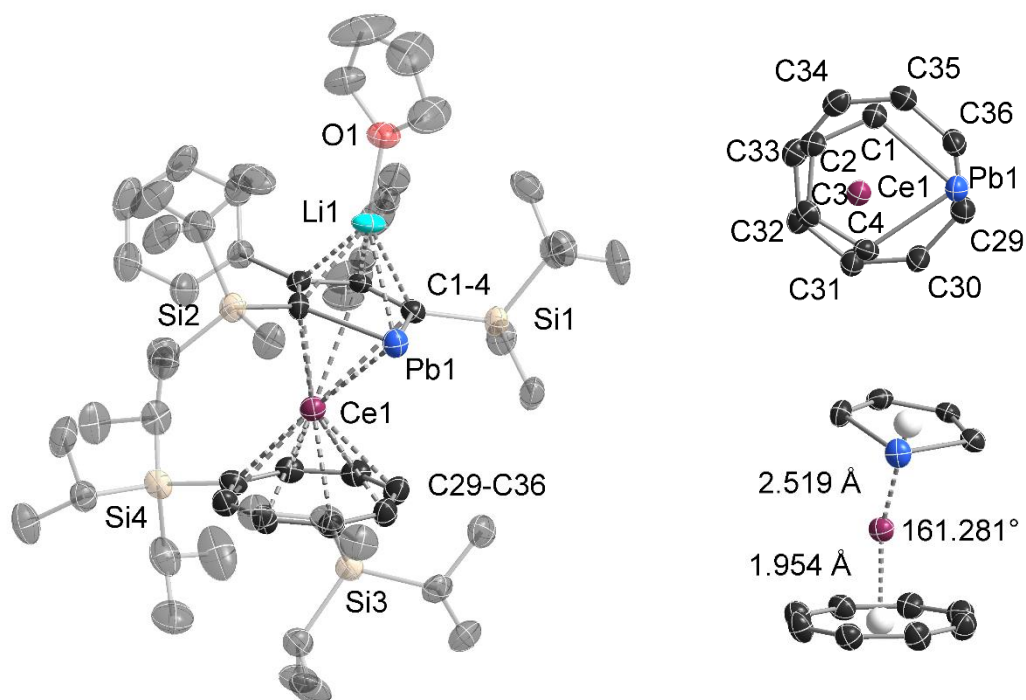

**Figure S43.** Left: Molecular structure of **6** in the solid state. Thermal ellipsoids are represented at 50% probability. Hydrogen atoms are omitted for clarity. Only one part of the disordered TIPS-group at Si4 is depicted. For selected bond lengths and angles see Table S8. Top right: Top view of the central complex fragment. Bottom right: Front view of the central complex fragment with Ce1-Ct distances (left) and Ct-Ce1-Ct angle (right).

**Table S8.** Selected bond lengths and angles for  $[\text{Li}(\text{thf})(\eta^5\text{-L}^{\text{Pb}})\text{Ce}(\eta^8\text{-COT}^{\text{TIPS}})]$  (**6**); Ct = Centroid of the subscript ring moiety

| Length/Å                  |                   | Angle/°                                      |           |
|---------------------------|-------------------|----------------------------------------------|-----------|
| Ce1-Ct <sub>COTTIPS</sub> | 1.9540(4)         | Ct <sub>COTTIPS</sub> -Ce1-Ct <sub>LPb</sub> | 161.28(2) |
| Ce1-Ct <sub>LPb</sub>     | 2.5186(4)         | Ce1-Ct <sub>LPb</sub> -Li1                   | 168.3(4)  |
| Li1-Ct <sub>LPb</sub>     | 1.82(1)           | Angle sum COT <sup>TIPS</sup>                | 1079.9    |
| Ce1-Pb1                   | 3.3452(4)         | Angle sum L <sup>Pb</sup>                    | 539.9     |
| Ce1-C <sub>COTTIPS</sub>  | 2.655(8)-2.771(7) |                                              |           |
| Ce1-C <sub>LPb</sub>      | 2.762(9)-2.953(8) |                                              |           |
| Li1-O1                    | 1.888(14)         |                                              |           |

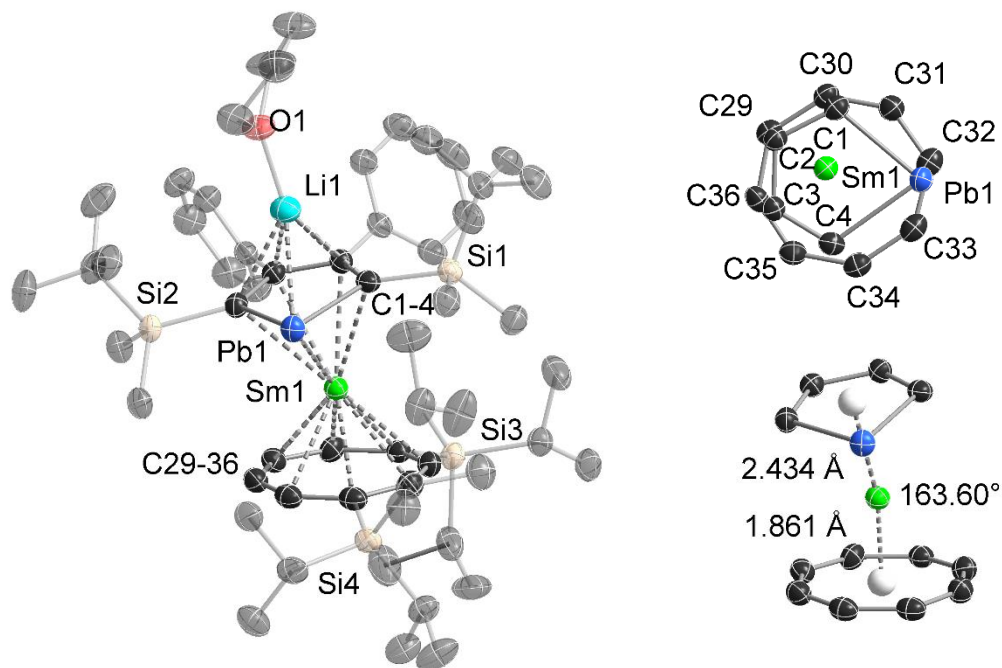

**Figure S44.** Left: Molecular structure of **7** in the solid state. Thermal ellipsoids are represented at 50% probability. Hydrogen atoms and one molecule of toluene are omitted for clarity. For selected bond lengths and angles see Table S9. Top right: Top view of the central complex fragment. Bottom right: Front view of the central complex fragment with Ce1-Ct distances (left) and Ct-Ce1-Ct angle (right).

**Table S9.** Selected bond lengths and angles for  $[\text{Li}(\text{thf})(\eta^5\text{-L}^{\text{Pb}})\text{Sm}(\eta^8\text{-COT}^{\text{TIPS}})]$  (**7**); Ct = Centroid of the subscript ring moiety

| Length/Å                  |                   | Angle/°                                      |           |
|---------------------------|-------------------|----------------------------------------------|-----------|
| Sm1-Ct <sub>COTTIPS</sub> | 1.8614(3)         | Ct <sub>COTTIPS</sub> -Sm1-Ct <sub>LPb</sub> | 163.60(2) |
| Sm1-Ct <sub>LPb</sub>     | 2.4344(3)         | Sm1-Ct <sub>LPb</sub> -Li1                   | 169.9(2)  |
| Li1-Ct <sub>LPb</sub>     | 1.824(6)          | Angle sum COT <sup>TIPS</sup>                | 1079.9    |
| Sm1-Pb1                   | 3.2646(2)         | Angle sum L <sup>Pb</sup>                    | 539.9     |
| Sm1-C <sub>COTTIPS</sub>  | 2.577(3)-2.715(3) |                                              |           |
| Sm1-C <sub>LPb</sub>      | 2.662(3)-2.870(3) |                                              |           |
| Li1-O1                    | 1.867(6)          |                                              |           |

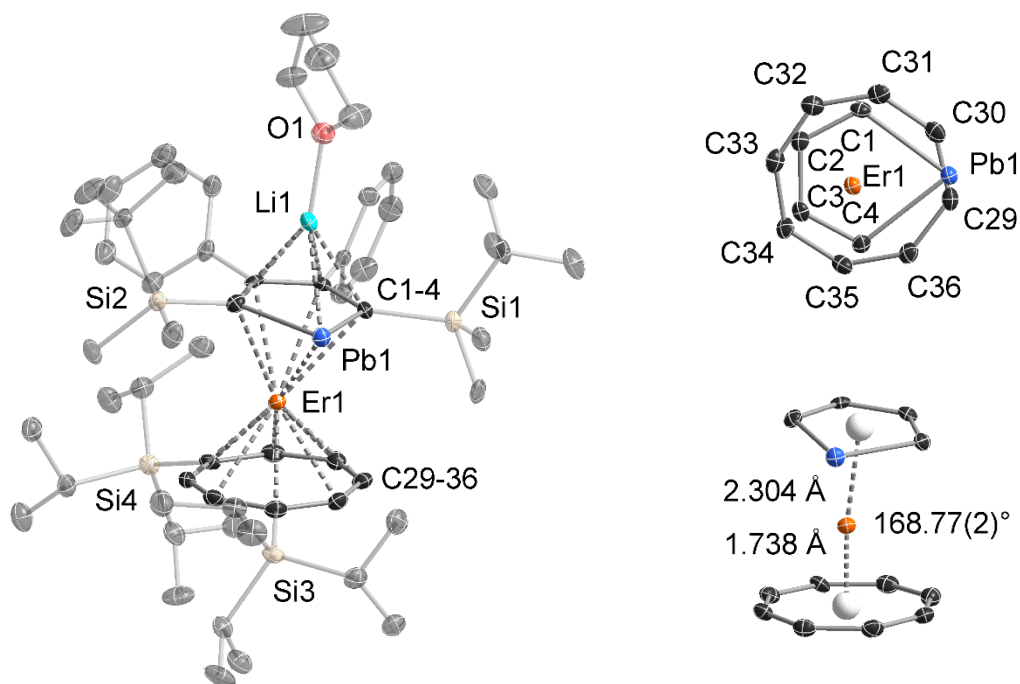

**Figure S45.** Left: Molecular structure of **8** in the solid state. Thermal ellipsoids are represented at 50% probability. Hydrogen atoms are omitted for clarity. For selected bond lengths and angles see Table S10. Top right: Top view of the central complex fragment. Bottom right: Front view of the central complex fragment with Er1-Ct distances (left) and Ct-Er1-Ct angle (right).

**Table S10.** Selected bond lengths and angles for  $[\text{Li}(\text{thf})(\eta^5\text{-L}^{\text{Pb}})\text{Er}(\eta^8\text{-COT}^{\text{TIPS}})]$  (**8**); Ct = Centroid of the subscript ring moiety

| Length/Å                  |                    | Angle/°                                      |           |
|---------------------------|--------------------|----------------------------------------------|-----------|
| Er1-Ct <sub>COTTIPS</sub> | 1.7385(3)          | Ct <sub>COTTIPS</sub> -Er1-Ct <sub>Lpb</sub> | 168.77(2) |
| Er1-Ct <sub>Lpb</sub>     | 2.3041(3)          | Er1-Ct <sub>Lpb</sub> -Li1                   | 171.3(3)  |
| Li1-Ct <sub>Lpb</sub>     | 1.798(11)          | Angle sum COT <sup>TIPS</sup>                | 1079.8    |
| Er1-Pb1                   | 3.1492(4)          | Angle sum L <sup>Pb</sup>                    | 539.7     |
| Er1-C <sub>COTTIPS</sub>  | 2.498(6)- 2.633(6) |                                              |           |
| Er1-C <sub>Lpb</sub>      | 2.575(5)- 2.742(6) |                                              |           |
| Li1-O1                    | 1.894(12)          |                                              |           |

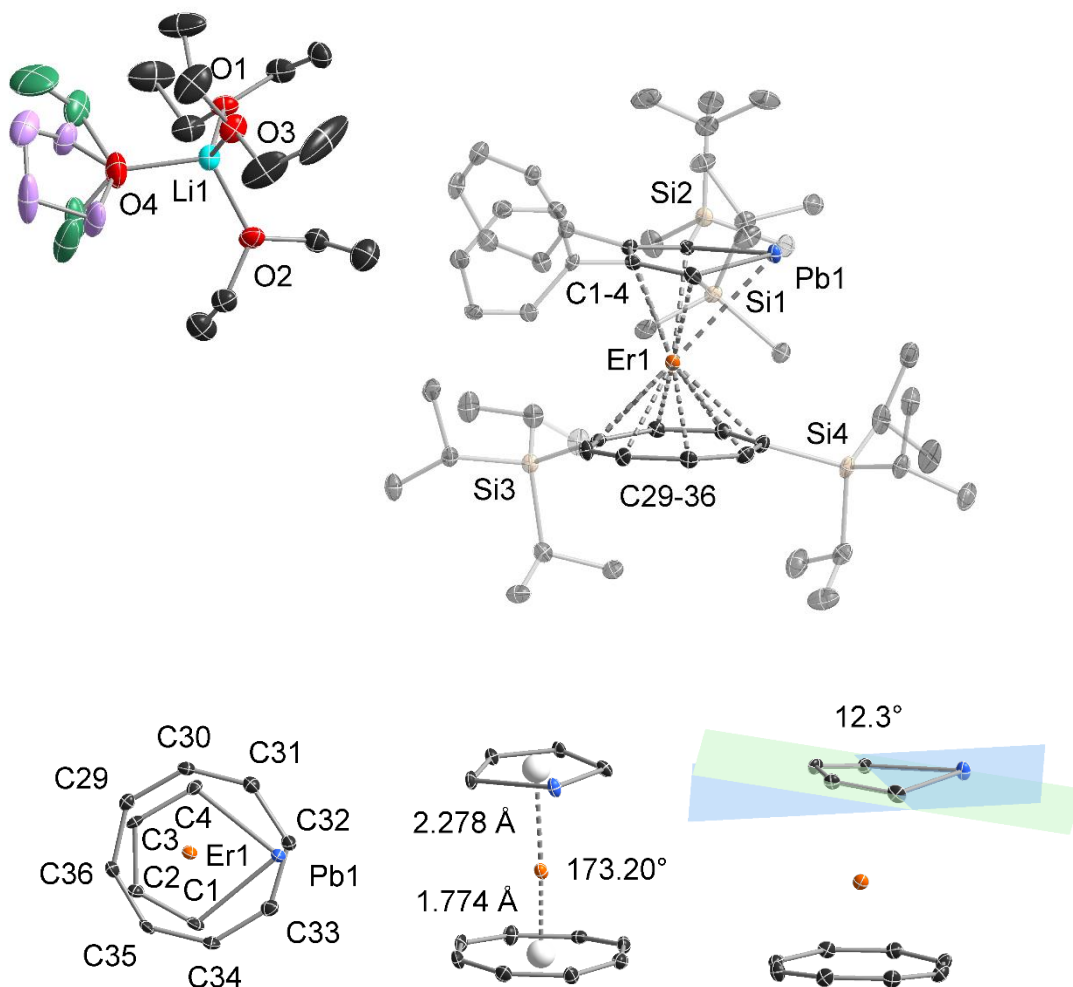

**Figure S46.** Left: Molecular structure of **9** in the solid state. Thermal ellipsoids are represented at 50% probability. Hydrogen atoms are omitted for clarity. The disordered THF and Et<sub>2</sub>O ligands are depicted in pink and green, respectively. For selected bond lengths and angles see Table S11. Bottom left: Top view of the central complex fragment. Bottom middle: Front view of the central complex fragment with Er1-Ct distances (left) and Ct-Er1-Ct angle (right). Bottom right: Side view of the central complex fragment with the dihedral bending angle of the L<sup>Pb</sup> ligand.

**Table S11.** Selected bond lengths and angles for [Li(Et<sub>2</sub>O)<sub>3.4</sub>(thf)<sub>0.6</sub>][( $\eta^5$ -L<sup>Pb</sup>)Er( $\eta^8$ -COT<sup>TIPS</sup>)] (**9**); Ct = Centroid of the subscript ring moiety

| Length/Å                  |                     | Angle/°                                      |           |
|---------------------------|---------------------|----------------------------------------------|-----------|
| Er1-Ct <sub>COTTIPS</sub> | 1.7737(4)           | Ct <sub>COTTIPS</sub> -Er1-Ct <sub>LPb</sub> | 173.20(2) |
| Er1-Ct <sub>LPb</sub>     | 2.2777(4)           | Angle sum COT <sup>TIPS</sup>                | 1079.3    |
| Li1-Ct <sub>LPb</sub>     | 10.130(13)          | Angle sum L <sup>Pb</sup>                    | 538.0     |
| Er1-Pb1                   | 3.1519(3)           | Dihedral angle L <sup>Pb</sup>               | 12.3(3)   |
| Er1-C <sub>COTTIPS</sub>  | 2.520(5)-2.634(4)   |                                              |           |
| Er1-C <sub>LPb</sub>      | 2.583(4)-2.654(4)   |                                              |           |
| Li1-O1/2                  | 1.981(10)/1.976(11) |                                              |           |
| Li1-O2/3                  | 1.948(10)/1.971(11) |                                              |           |

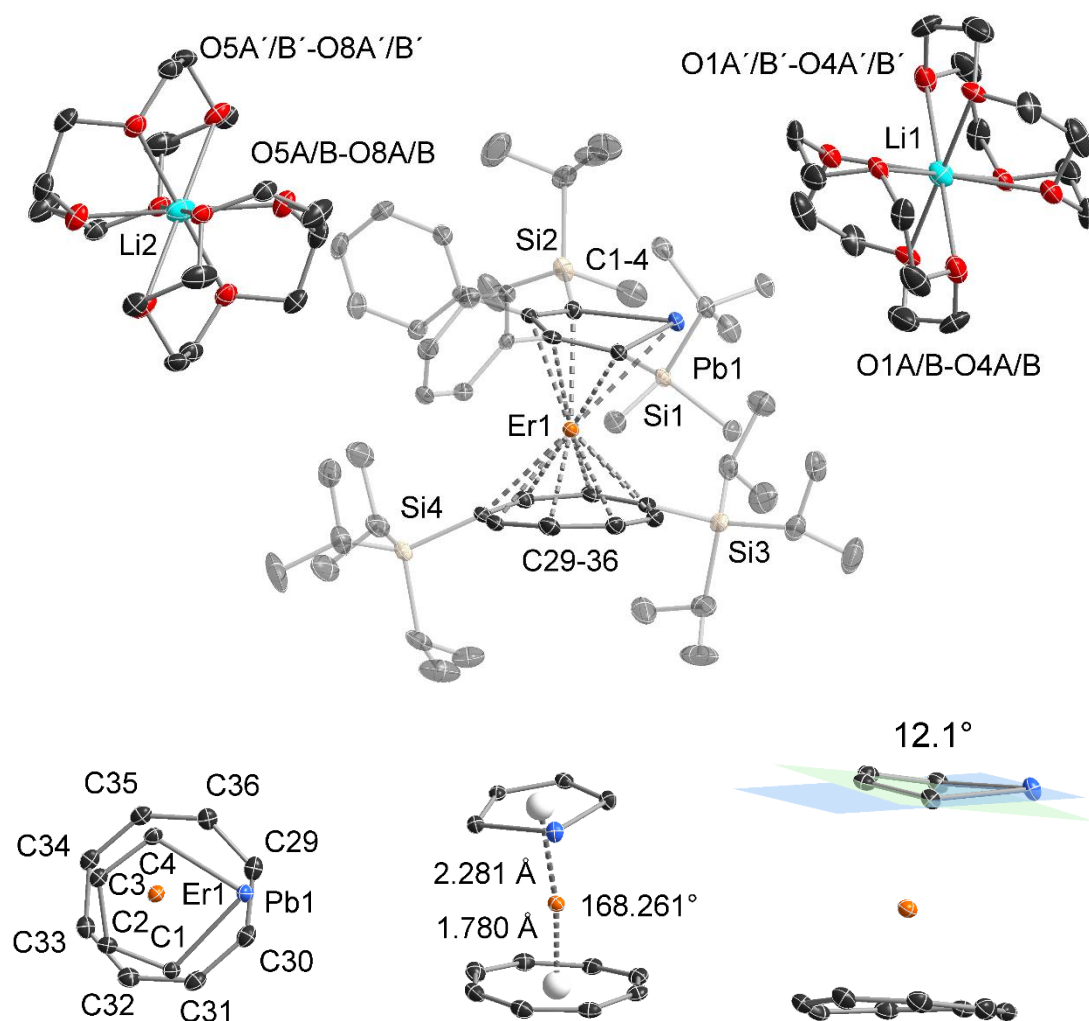

**Figure S47.** Top: Molecular structure of **10** in the solid state. Each  $[\text{Li}(12\text{-c-4})_2]^+$  cation is half-occupied. Thermal ellipsoids are represented at 50% probability. Hydrogen atoms are omitted for clarity. Only one part of the disordered parts of the Li-coordinated disordered 12-c-4 ligands are shown. For selected bond lengths and angles see Table S12. Bottom left: Top view of the central complex fragment. Bottom middle: Front view of the central complex fragment with Er1-Ct distances (left) and Ct-Er1-Ct angle (right). Bottom right: Side view of the central complex fragment with the dihedral bending angle of the  $\text{L}^{\text{Pb}}$  ligand.



**Table S12.** Selected bond lengths and angles for  $[\text{Li}(12\text{-c-4})_2][(\eta^5\text{-L}^{\text{Pb}})\text{Er}(\eta^8\text{-COT}^{\text{TIPS}})]$  (**10**);  
 Ct = Centroid of the subscript ring moiety

| Length/Å                  |                   | Angle/°                                      |           |
|---------------------------|-------------------|----------------------------------------------|-----------|
| Er1-Ct <sub>COTTIPS</sub> | 1.7800(3)         | Ct <sub>COTTIPS</sub> -Er1-Ct <sub>LPb</sub> | 168.26(2) |
| Er1-Ct <sub>LPb</sub>     | 2.2807(4)         | Angle sum COT <sup>TIPS</sup>                | 1078.9    |
| Li1-Ct <sub>LPb</sub>     | 8.2603(7)         | Angle sum L <sup>Pb</sup>                    | 541.2     |
| Li2-Ct <sub>LPb</sub>     | 9.4853(11)        | Dihedral angle L <sup>Pb</sup>               | 12.09(12) |
| Er1-Pb1                   | 3.1576(3)         |                                              |           |
| Er1-C <sub>COTTIPS</sub>  | 2.516(3)-2.669(2) |                                              |           |
| Er1-C <sub>LPb</sub>      | 2.576(3)-2.664(2) |                                              |           |
| Li1-O (part 1)            | 2.396(5)-2.409(6) |                                              |           |
| Li1-O (part 2)            | 2.284(6)-2.479(6) |                                              |           |
| Li2-O (part 1)            | 2.200(4)-2.364(5) |                                              |           |
| Li2-O (part 2)            | 2.196(4)-2.448(4) |                                              |           |

## Magnetism and Calculations

### Magnetism

DC and AC Susceptibility measurements were performed on a Quantum Design MPMS-XL SQUID-magnetometer. DC data was taken upon cooling from 300 K to 2 K in an applied field  $H_{DC} = 1000$  Oe. AC susceptibility data was taken at various temperatures upon scanning the frequency of an alternating field  $H_{AC} = 3.5$  Oe. Magnetization measurements were performed using a Quantum Design MPMS3 VSM SQUID-magnetometer.  $M(H)$  curves were collected with a stable field at each point, while hysteresis loops were collected using a continuous field sweep of 50 Oe/s and 200 Oe/s. The powdered samples were sealed in a quartz glass tube with small amounts of eicosane to prevent sample movement. All data were corrected for the diamagnetic contributions of the sample, the quartz glass and the eicosane.

### Calculations

Ab initio-CASSCF calculations were conducted using MOLCAS 8.2.<sup>7</sup> The input structures were taken from the crystal structure refinement. The applied basis sets were relativistic ANO basis sets taken from the Molcas-libraries. The size of the basis sets were VTZP for Er and Pb, VDZP for Li, O and coordinating C's, and VDZ for Si, H, and peripheral C's. 35 Quartets and 112 Doublets were employed during the orbital optimisation and subsequent spin-orbit coupling.

**Table S13.** Fitting parameters for [Li(thf)( $\eta^5$ -L<sup>Pb</sup>)Er( $\eta^8$ -COT<sup>TIPS</sup>)] (**8**). (H<sub>DC</sub> = 0 Oe)

| T/K | $\chi_\tau$ | $\chi_s$ | $\tau$   | $\alpha$ |
|-----|-------------|----------|----------|----------|
| 2   | 3.92        | 1.81E-01 | 2.00E-02 | 3.01E-01 |
| 2.2 | 3.60        | 1.62E-01 | 1.97E-02 | 3.01E-01 |
| 2.4 | 3.27        | 1.38E-01 | 1.95E-02 | 3.04E-01 |
| 2.6 | 3.00        | 1.20E-01 | 1.93E-02 | 3.05E-01 |
| 2.8 | 2.78        | 1.05E-01 | 1.90E-02 | 3.06E-01 |
| 3   | 2.58        | 9.13E-02 | 1.88E-02 | 3.07E-01 |
| 3.2 | 2.41        | 7.96E-02 | 1.86E-02 | 3.08E-01 |
| 3.4 | 2.27        | 6.87E-02 | 1.83E-02 | 3.09E-01 |
| 3.6 | 2.14        | 5.86E-02 | 1.81E-02 | 3.10E-01 |
| 3.8 | 2.02        | 4.99E-02 | 1.79E-02 | 3.11E-01 |
| 4   | 1.91        | 4.28E-02 | 1.77E-02 | 3.11E-01 |
| 4.4 | 1.73        | 2.93E-02 | 1.73E-02 | 3.13E-01 |
| 4.8 | 1.58        | 1.80E-02 | 1.68E-02 | 3.14E-01 |
| 5.2 | 1.45        | 9.32E-03 | 1.63E-02 | 3.14E-01 |
| 5.6 | 1.34        | 2.67E-03 | 1.59E-02 | 3.15E-01 |
| 6   | 1.25        | 2.55E-18 | 1.54E-02 | 3.12E-01 |
| 6.4 | 1.17        | 2.19E-16 | 1.49E-02 | 3.07E-01 |
| 6.8 | 1.10        | 2.55E-16 | 1.44E-02 | 3.08E-01 |
| 7.2 | 1.17        | 1.24E-01 | 1.37E-02 | 3.06E-01 |
| 7.6 | 1.11        | 1.21E-01 | 1.30E-02 | 2.99E-01 |
| 8   | 1.05        | 1.18E-01 | 1.21E-02 | 2.90E-01 |
| 8.4 | 1.00        | 1.15E-01 | 1.10E-02 | 2.78E-01 |
| 8.8 | 9.51E-01    | 1.13E-01 | 9.77E-03 | 2.62E-01 |
| 9.2 | 9.05E-01    | 1.11E-01 | 8.31E-03 | 2.40E-01 |
| 9.6 | 8.62E-01    | 1.09E-01 | 6.74E-03 | 2.15E-01 |
| 10  | 8.22E-01    | 1.06E-01 | 5.21E-03 | 1.91E-01 |
| 11  | 7.39E-01    | 9.55E-02 | 2.29E-03 | 1.47E-01 |
| 12  | 6.73E-01    | 8.51E-02 | 8.79E-04 | 1.26E-01 |
| 13  | 6.23E-01    | 7.53E-02 | 3.39E-04 | 1.20E-01 |
| 14  | 5.80E-01    | 6.76E-02 | 1.34E-04 | 1.14E-01 |

**Table S14.** CASSCF states, axes, g-tensors for [Li(thf)( $\eta^5$ -L<sup>Pb</sup>)Er( $\eta^8$ -COT<sup>TIPS</sup>)] (**8**).

| Doublet state | $\Delta E/\text{cm}^{-1}$ | $\Delta E/\text{K}$ | Angle between magnetic z-axes/ $^\circ$ | $g_x$  | $g_y$  | $g_z$   | Wavefunction composition                                                                                                                             |
|---------------|---------------------------|---------------------|-----------------------------------------|--------|--------|---------|------------------------------------------------------------------------------------------------------------------------------------------------------|
| 1             | 0                         | 0                   | -                                       | 0.0025 | 0.0034 | 17.7831 | $\mp 98\%  15/2\rangle$                                                                                                                              |
| 2             | 95.61                     | 137.55              | 65.74                                   | 0.7784 | 1.9254 | 13.8614 | $\pm 34\%  5/2\rangle \pm 33\%  3/2\rangle \pm 10\%  13/2\rangle \pm 9\%  7/2\rangle \pm 9\%  1/2\rangle \pm 3\%  9/2\rangle$                        |
| 3             | 111.72                    | 160.74              | 43.41                                   | 1.4517 | 3.5321 | 12.7676 | $\mp 25\%  11/2\rangle \mp 24\%  13/2\rangle \mp 17\%  9/2\rangle \mp 12\%  3/2\rangle \mp 8\%  1/2\rangle \mp 7\%  7/2\rangle \pm 6\%  5/2\rangle$  |
| 4             | 130.57                    | 187.86              | 25.81                                   | 7.2108 | 6.6231 | 0.6428  | $\pm 48\%  1/2\rangle \pm 13\%  7/2\rangle \pm 9\%  5/2\rangle \mp 8\%  13/2\rangle \pm 8\%  9/2\rangle \mp 7\%  3/2\rangle \pm 6\%  11/2\rangle$    |
| 5             | 151.47                    | 217.93              | 52.18                                   | 1.4248 | 1.7435 | 13.0270 | $\pm 42\%  7/2\rangle \pm 20\%  13/2\rangle \pm 16\%  5/2\rangle \pm 11\%  1/2\rangle \pm 8\%  3/2\rangle$                                           |
| 6             | 173.97                    | 250.30              | 56.55                                   | 1.3596 | 3.2096 | 11.3262 | $\mp 27\%  3/2\rangle \mp 25\%  9/2\rangle \mp 19\%  1/2\rangle \mp 13\%  13/2\rangle \mp 7\%  11/2\rangle \pm 6\%  5/2\rangle \pm 2\%  7/2\rangle$  |
| 7             | 196.03                    | 282.04              | 52.31                                   | 1.5352 | 3.1801 | 12.7121 | $\mp 28\%  5/2\rangle \mp 27\%  9/2\rangle \mp 18\%  7/2\rangle \mp 12\%  3/2\rangle \mp 10\%  13/2\rangle \mp 3\%  1/2\rangle \pm 2\%  11/2\rangle$ |
| 8             | 223.84                    | 322.06              | 38.28                                   | 0.2837 | 0.4327 | 15.6427 | $\pm 57\%  11/2\rangle \pm 18\%  9/2\rangle \pm 14\%  13/2\rangle \pm 7\%  7/2\rangle \pm 2\%  3/2\rangle$                                           |

**Table S15.** Transition probabilities within the lowest three doublet states of [Li(thf)( $\eta^5$ -L<sup>Pb</sup>)Er( $\eta^8$ -COT<sup>TIPS</sup>)] (**8**).

|   | 1          | 2          | 3          | 4          | 5          | 6          |
|---|------------|------------|------------|------------|------------|------------|
| 1 |            | 0.1466E-05 | 0.1183E-01 | 0.9824E+00 | 0.7444E+00 | 0.1361E+00 |
| 2 | 0.1466E-05 |            | 0.9824E+00 | 0.1183E-01 | 0.1361E+00 | 0.7444E+00 |
| 3 | 0.1183E-01 | 0.9824E+00 |            | 0.4446E+00 | 0.1158E+01 | 0.4076E+01 |
| 4 | 0.9824E+00 | 0.1183E-01 | 0.4446E+00 |            | 0.4076E+01 | 0.1158E+01 |
| 5 | 0.7444E+00 | 0.1361E+00 | 0.1158E+01 | 0.4076E+01 |            | 0.1239E+02 |
| 6 | 0.1361E+00 | 0.7444E+00 | 0.4076E+01 | 0.1158E+01 | 0.1239E+02 |            |







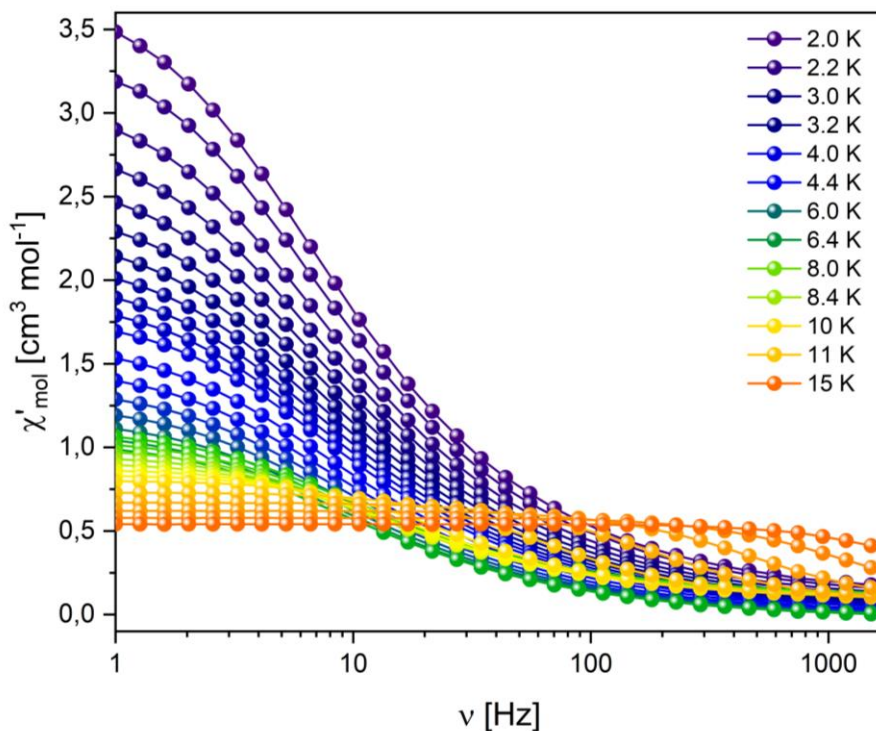

**Figure S54.** In-phase-component of the mag. susceptibility vs frequency of  $[\text{Li}(\text{thf})(\eta^5\text{-L}^{\text{Pb}})\text{Er}(\eta^8\text{-COT}^{\text{TIPS}})]$  (**8**) ( $H_{\text{DC}} = 0$  Oe).

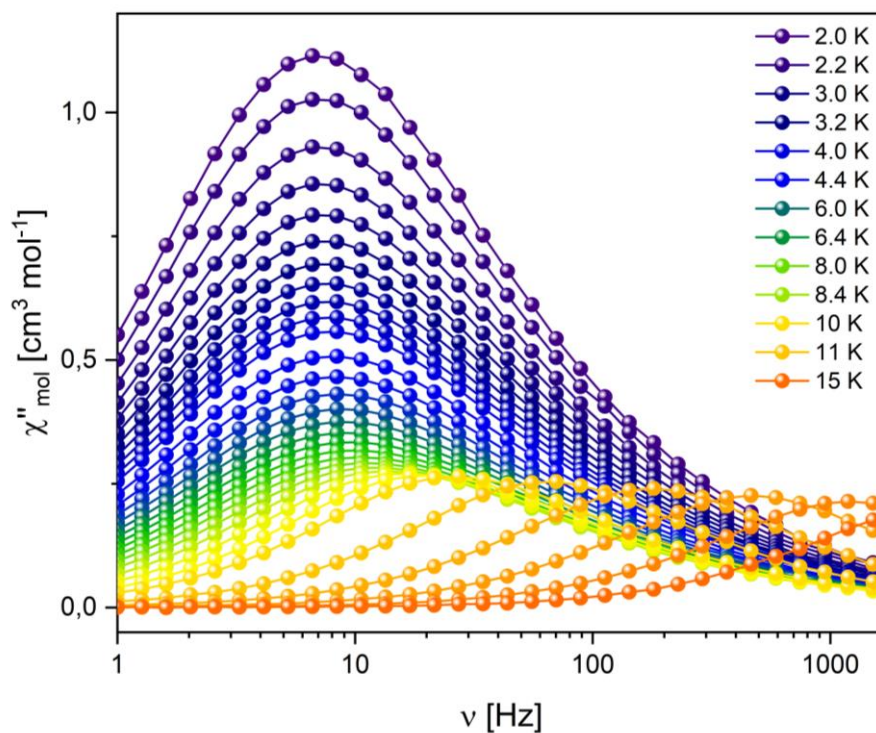

**Figure S55.** Out-of-phase-component of the mag. susceptibility vs frequency of  $[\text{Li}(\text{thf})(\eta^5\text{-L}^{\text{Pb}})\text{Er}(\eta^8\text{-COT}^{\text{TIPS}})]$  (**8**) ( $H_{\text{DC}} = 0$  Oe).



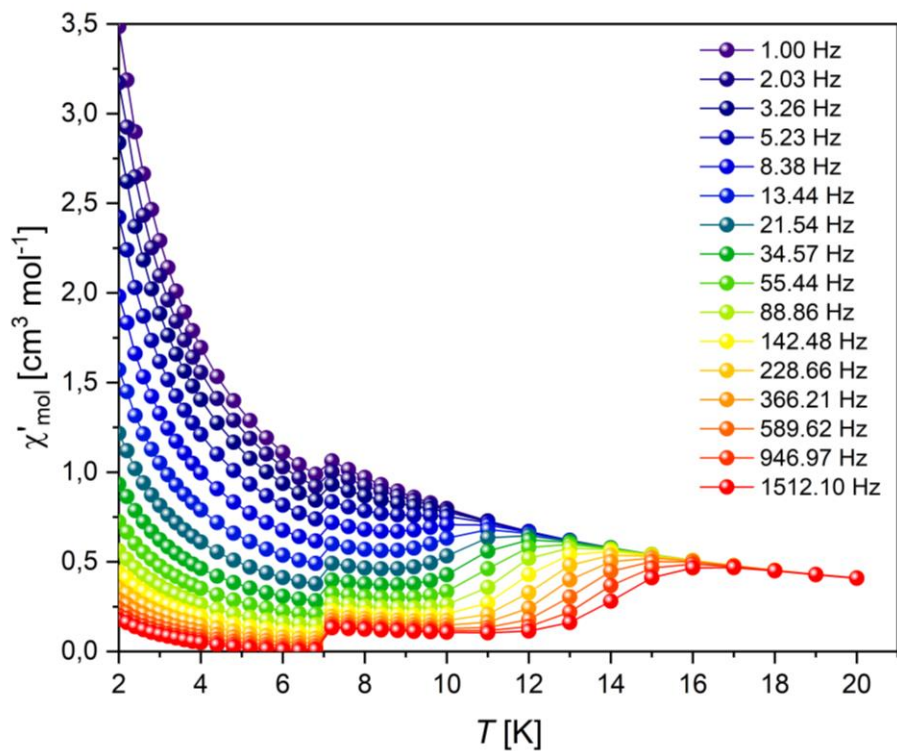

**Figure S56.** In-phase-component of the mag. susceptibility vs temperature of  $[\text{Li}(\text{thf})(\eta^5\text{-L}^{\text{Pb}})\text{Er}(\eta^8\text{-COT}^{\text{TIPS}})]$  (**8**) ( $H_{\text{DC}} = 0$  Oe).

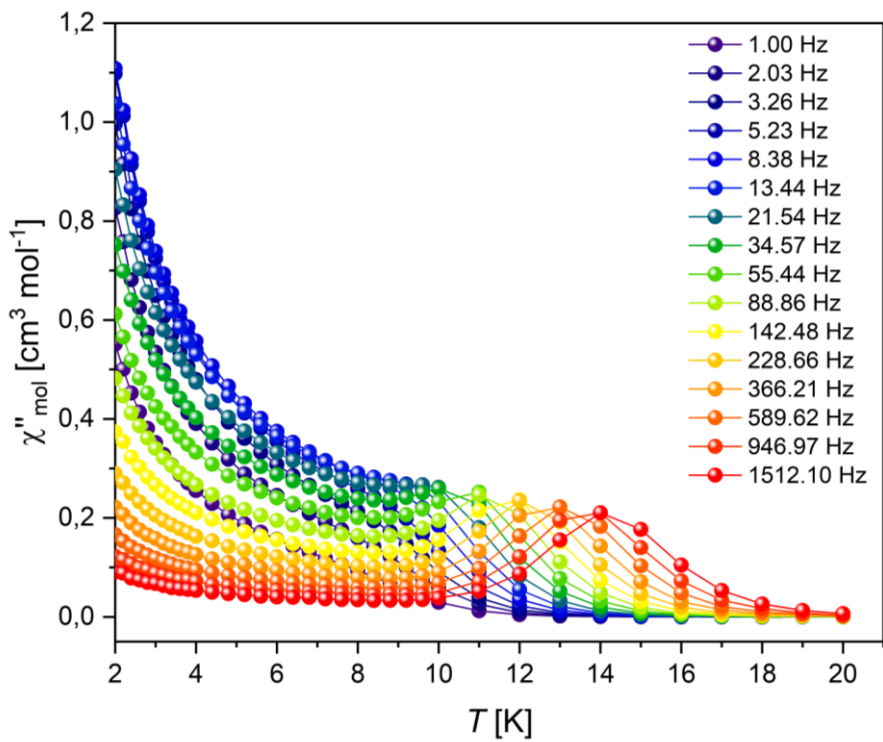

**Figure S57.** Out-of-phase-component of the mag. susceptibility vs Temperature of  $[\text{Li}(\text{thf})(\eta^5\text{-L}^{\text{Pb}})\text{Er}(\eta^8\text{-COT}^{\text{TIPS}})]$  (**8**) ( $H_{\text{DC}} = 0$  Oe).

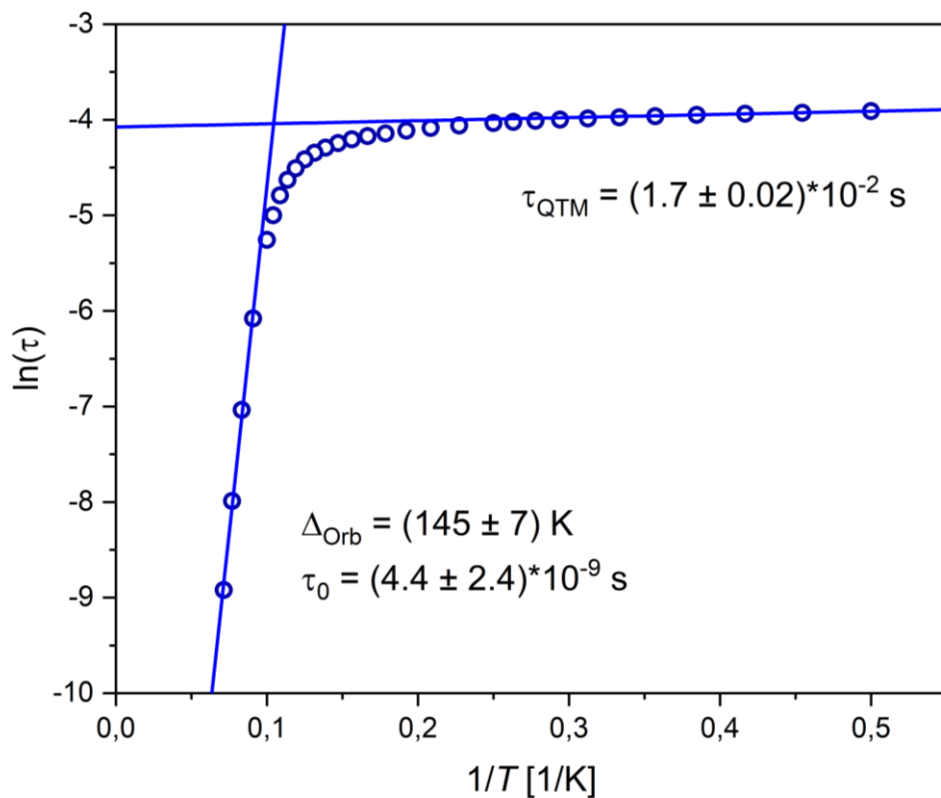

**Figure S58.** Arrhenius plot of  $[\text{Li}(\text{thf})(\eta^5\text{-L}^{\text{Pb}})\text{Er}(\eta^8\text{-COT}^{\text{TIPS}})]$  (**8**).

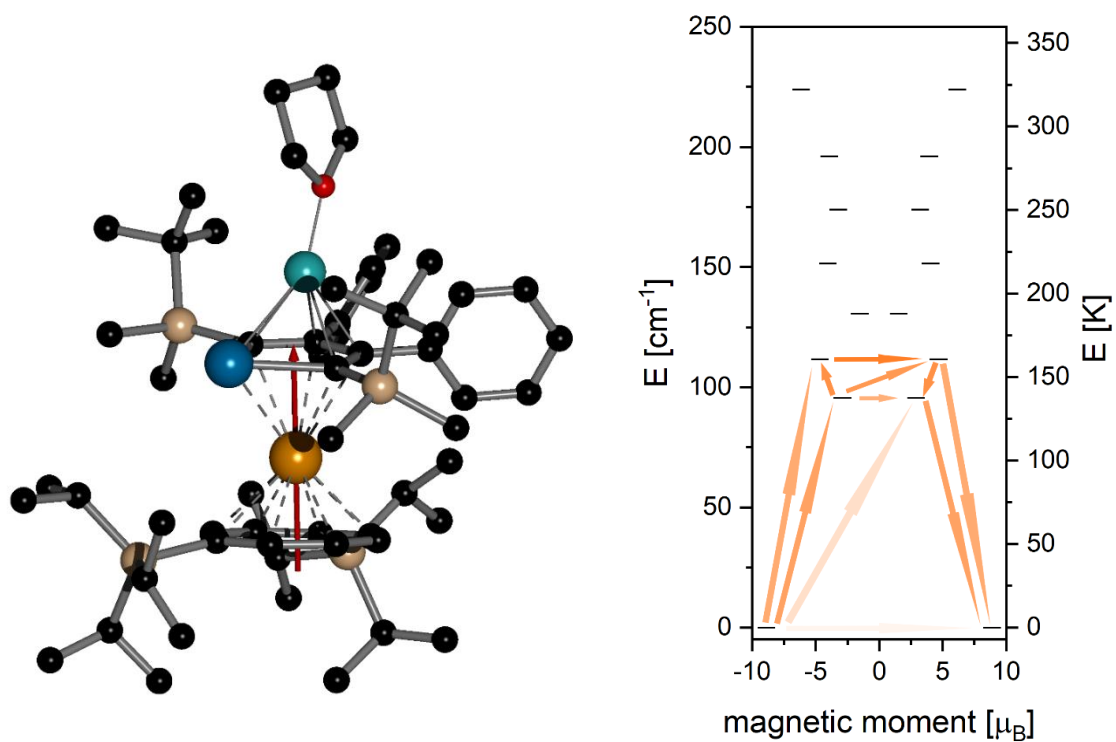

**Figure S59.** Left: Magnetic anisotropy axis of  $[\text{Li}(\text{thf})(\eta^5\text{-L}^{\text{Pb}})\text{Er}(\eta^8\text{-COT}^{\text{TIPS}})]$  (**8**). Right: *Ab initio* states.

**Table S16.** Fitting parameters for [Li(12-c-4)<sub>2</sub>][(η<sup>5</sup>-L<sup>Pb</sup>)Er(η<sup>8</sup>-COT<sup>TIPS</sup>)] (**10**). (H<sub>DC</sub> = 0 Oe)

| T/K | χ <sub>τ</sub> | χ <sub>s</sub> | τ        | α        |
|-----|----------------|----------------|----------|----------|
| 2   | 4.26           | 6.96E-01       | 3.55E+01 | 3.06E-01 |
| 2.2 | 3.88           | 6.46E-01       | 3.45E+01 | 3.03E-01 |
| 2.4 | 3.60           | 6.44E-01       | 3.44E+01 | 2.90E-01 |
| 2.6 | 3.33           | 5.74E-01       | 3.31E+01 | 2.98E-01 |
| 2.8 | 3.10           | 5.17E-01       | 3.21E+01 | 3.07E-01 |
| 3   | 2.90           | 5.01E-01       | 3.17E+01 | 3.01E-01 |
| 3.2 | 2.72           | 4.69E-01       | 3.11E+01 | 3.03E-01 |
| 3.4 | 2.57           | 4.42E-01       | 3.04E+01 | 3.05E-01 |
| 3.6 | 2.43           | 4.39E-01       | 3.03E+01 | 2.97E-01 |
| 3.8 | 2.31           | 4.45E-01       | 3.04     | 2.85E-01 |
| 4   | 2.20           | 4.12E-01       | 2.96E+01 | 2.93E-01 |
| 4.4 | 2.01           | 3.85E-01       | 2.88E+01 | 2.92E-01 |
| 4.8 | 1.85           | 3.43E-01       | 2.75E+01 | 3.01E-01 |
| 5.2 | 1.72           | 3.32E-01       | 2.68E+01 | 2.91E-01 |
| 5.6 | 1.61           | 3.60E-01       | 2.58E+01 | 2.67E-01 |
| 6   | 1.51           | 3.62E-01       | 2.42E+01 | 2.46E-01 |
| 6.4 | 1.42           | 3.57E-01       | 2.14E+01 | 2.20E-01 |
| 6.8 | 1.35           | 3.29E-01       | 1.69E+01 | 2.05E-01 |
| 7.2 | 1.28           | 3.17E-01       | 1.30E+01 | 1.80E-01 |
| 7.6 | 1.22           | 2.30E-01       | 8.09E+00 | 1.93E-01 |
| 8   | 1.17           | 2.10E-01       | 5.47E+00 | 1.79E-01 |
| 8.4 | 1.12           | 7.45E-02       | 2.96E+00 | 2.00E-01 |

**Table S17.** CASSCF states, axes, g-tensors for [Li(12-c-4)<sub>2</sub>][( $\eta^5$ -L<sup>Pb</sup>)Er( $\eta^8$ -COT<sup>TIPS</sup>)] (**10**).

| Doublet state | $\Delta E/\text{cm}^{-1}$ | $\Delta E/\text{K}$ | Angle between magnetic z-axes/ $^\circ$ | $g_x$  | $g_y$  | $g_z$   | Wavefunction composition                                                                                                                                                  |
|---------------|---------------------------|---------------------|-----------------------------------------|--------|--------|---------|---------------------------------------------------------------------------------------------------------------------------------------------------------------------------|
| 1             | 0                         | 0                   | -                                       | 0.0239 | 0.0690 | 17.0512 | $\pm 88\%  15/2\rangle \pm 3\%  9/2\rangle \pm 2\%  11/2\rangle \pm 2\%  5/2\rangle \pm 2\%  7/2\rangle \pm 2\%  13/2\rangle$                                             |
| 2             | 41.98                     | 60.41               | 79.29                                   | 0.3563 | 0.7498 | 15.4643 | $\pm 33\%  5/2\rangle \pm 24\%  3/2\rangle \pm 21\%  7/2\rangle \pm 6\%  9/2\rangle \pm 5\%  13/2\rangle \pm 5\%  15/2\rangle \pm 5\%  1/2\rangle$                        |
| 3             | 73.42                     | 105.64              | 83.27                                   | 0.1307 | 0.6712 | 13.7196 | $\mp 47\%  1/2\rangle \mp 17\%  3/2\rangle \mp 12\%  7/2\rangle \mp 9\%  9/2\rangle \pm 7\%  5/2\rangle \mp 4\%  11/2\rangle \pm 3\%  13/2\rangle$                        |
| 4             | 94.68                     | 136.22              | 81.61                                   | 2.8407 | 5.8519 | 10.2572 | $\mp 32\%  3/2\rangle \mp 24\%  1/2\rangle \mp 13\%  7/2\rangle \mp 12\%  5/2\rangle \mp 8\%  9/2\rangle \mp 6\%  13/2\rangle \mp 3\%  11/2\rangle$                       |
| 5             | 126.30                    | 181.72              | 41.76                                   | 0.6657 | 2.7365 | 10.6043 | $\pm 25\%  9/2\rangle \pm 19\%  7/2\rangle \pm 17\%  5/2\rangle \pm 14\%  13/2\rangle \pm 13\%  11/2\rangle \pm 9\%  1/2\rangle$                                          |
| 6             | 150.45                    | 216.46              | 49.86                                   | 0.2878 | 3.0276 | 13.0358 | $\mp 32\%  13/2\rangle \mp 19\%  11/2\rangle \mp 18\%  3/2\rangle \mp 15\%  5/2\rangle \mp 11\%  1/2\rangle \mp 2\%  15/2\rangle$                                         |
| 7             | 175.14                    | 251.99              | 51.55                                   | 0.9534 | 1.6034 | 15.4859 | $\pm 25\%  9/2\rangle \pm 25\%  7/2\rangle \pm 15\%  11/2\rangle \pm 12\%  13/2\rangle \pm 12\%  5/2\rangle \pm 6\%  3/2\rangle \pm 3\%  1/2\rangle \pm 2\%  15/2\rangle$ |
| 8             | 213.61                    | 307.34              | 41.25                                   | 0.1262 | 0.1840 | 16.6757 | $\mp 42\%  11/2\rangle \mp 25\%  13/2\rangle \mp 22\%  9/2\rangle \mp 7\%  7/2\rangle \mp 2\%  5/2\rangle$                                                                |

**Table S18.** Transition probabilities within the lowest three doublet states for [Li(12-c-4)<sub>2</sub>][( $\eta^5$ -L<sup>Pb</sup>)Er( $\eta^8$ -COT<sup>TIPS</sup>)] (**10**).

|   | 1          | 2          | 3          | 4          | 5          | 6          |
|---|------------|------------|------------|------------|------------|------------|
| 1 |            | 0.4617E-03 | 0.2802E+01 | 0.2087E-01 | 0.1935E+00 | 0.2491E+00 |
| 2 | 0.4617E-03 |            | 0.2087E-01 | 0.2802E+01 | 0.2491E+00 | 0.1935E+00 |
| 3 | 0.2802E+01 | 0.2087E-01 |            | 0.1716E+00 | 0.1473E+01 | 0.3105E+01 |
| 4 | 0.2087E-01 | 0.2802E+01 | 0.1716E+00 |            | 0.3105E+01 | 0.1473E+01 |
| 5 | 0.1935E+00 | 0.2491E+00 | 0.1473E+01 | 0.3105E+01 |            | 0.1240E+02 |
| 6 | 0.2491E+00 | 0.1935E+00 | 0.3105E+01 | 0.1473E+01 | 0.1240E+02 |            |

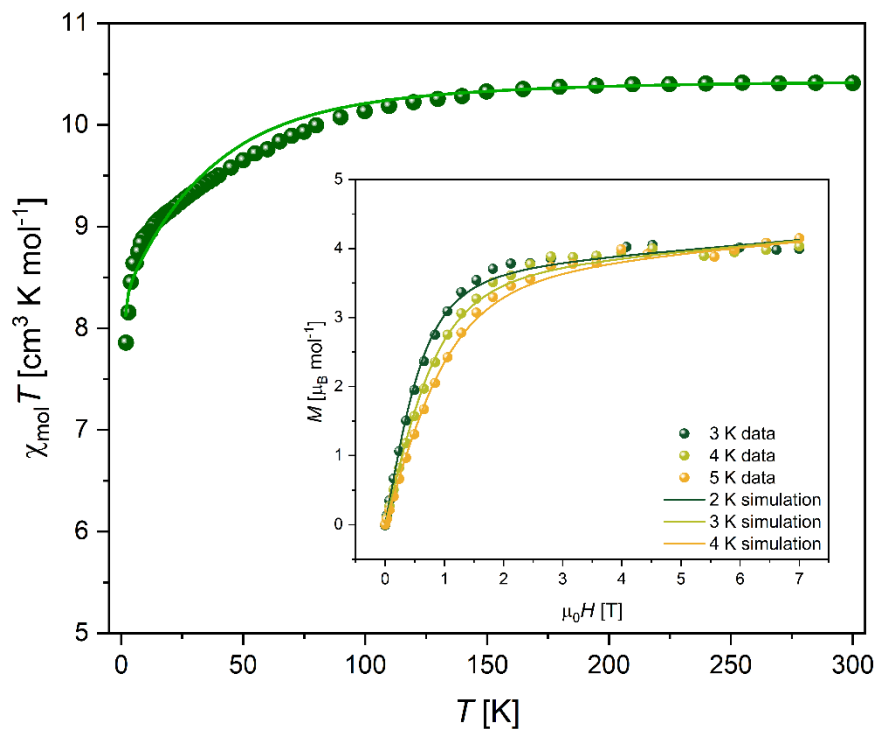

**Figure S60.** Susceptibility and Magnetization  $[\text{Li}(12\text{-c-}4)_2][(\eta^5\text{-L}^{\text{Pb}})\text{Er}(\eta^8\text{-COTTIPS})]$  (**10**).

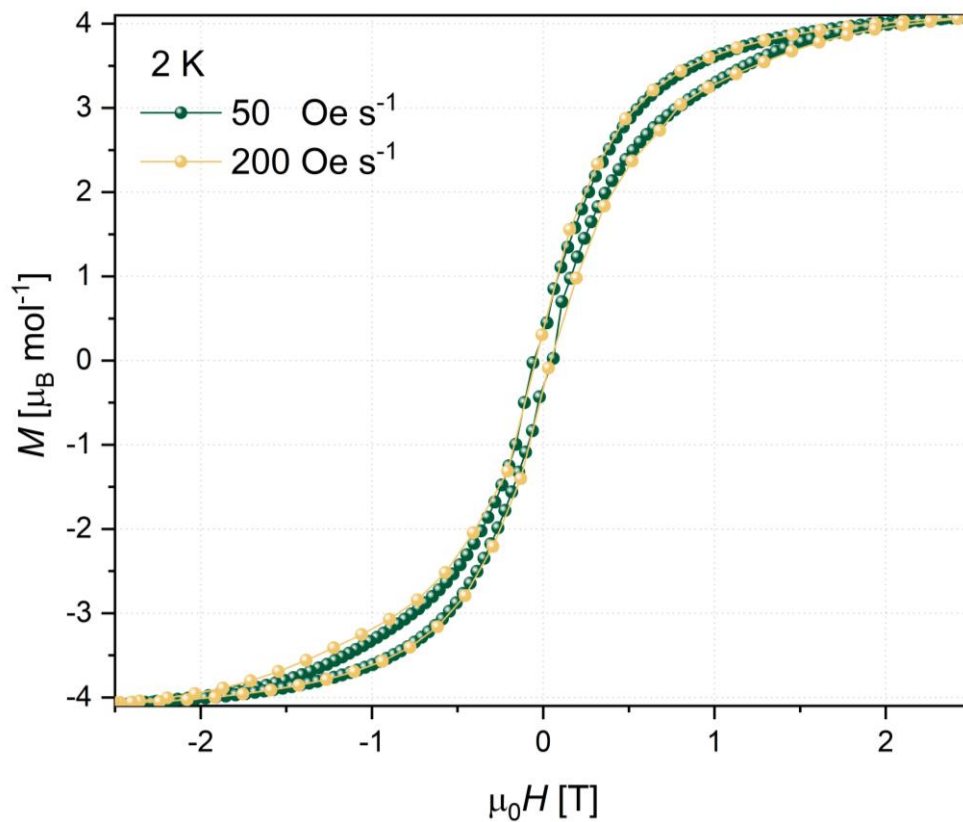

**Figure S61.** Hysteresis at 2 K for  $[\text{Li}(12\text{-c-}4)_2][(\eta^5\text{-L}^{\text{Pb}})\text{Er}(\eta^8\text{-COTTIPS})]$  (**10**).



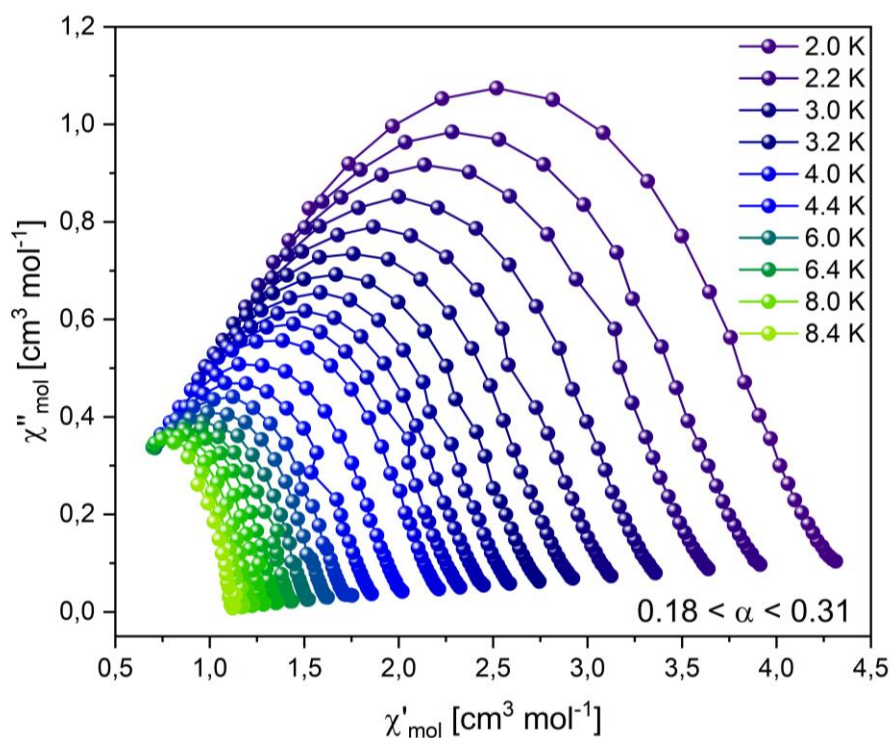

**Figure S64.** Cole-Cole plot for  $[\text{Li}(12\text{-c-}4)_2][(\eta^5\text{-L}^{\text{Pb}})\text{Er}(\eta^8\text{-COT}^{\text{TIPS}})]$  (**10**) ( $H_{\text{DC}} = 0$  Oe).

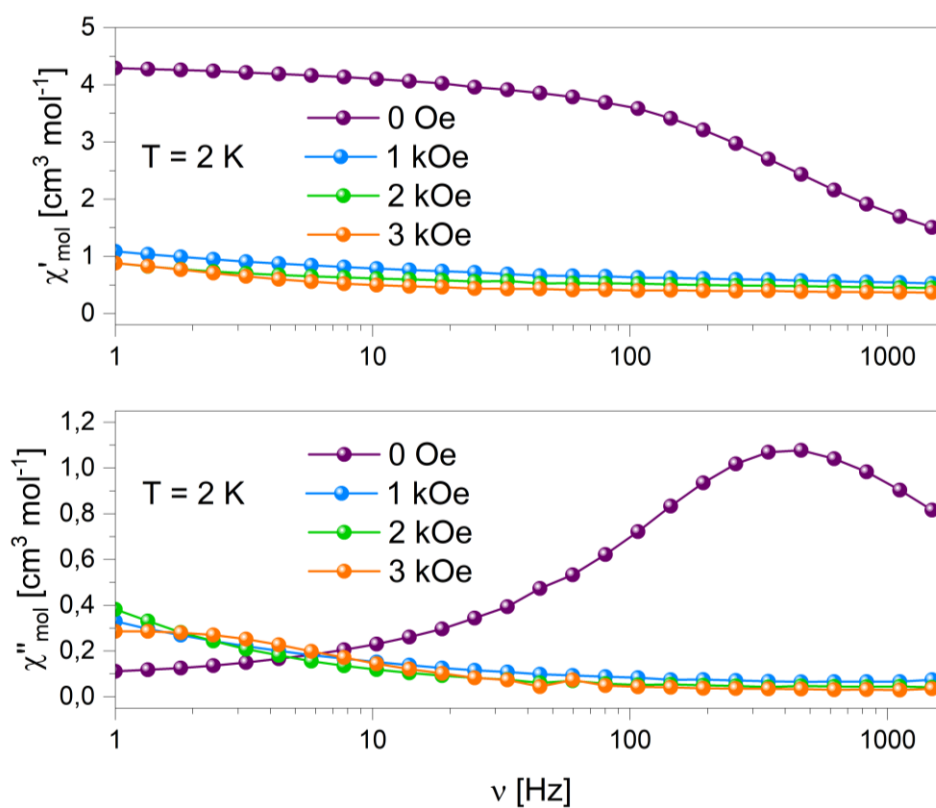

**Figure S65.** Field-dependent test measurement of  $[\text{Li}(12\text{-c-}4)_2][(\eta^5\text{-L}^{\text{Pb}})\text{Er}(\eta^8\text{-COT}^{\text{TIPS}})]$  (**10**).

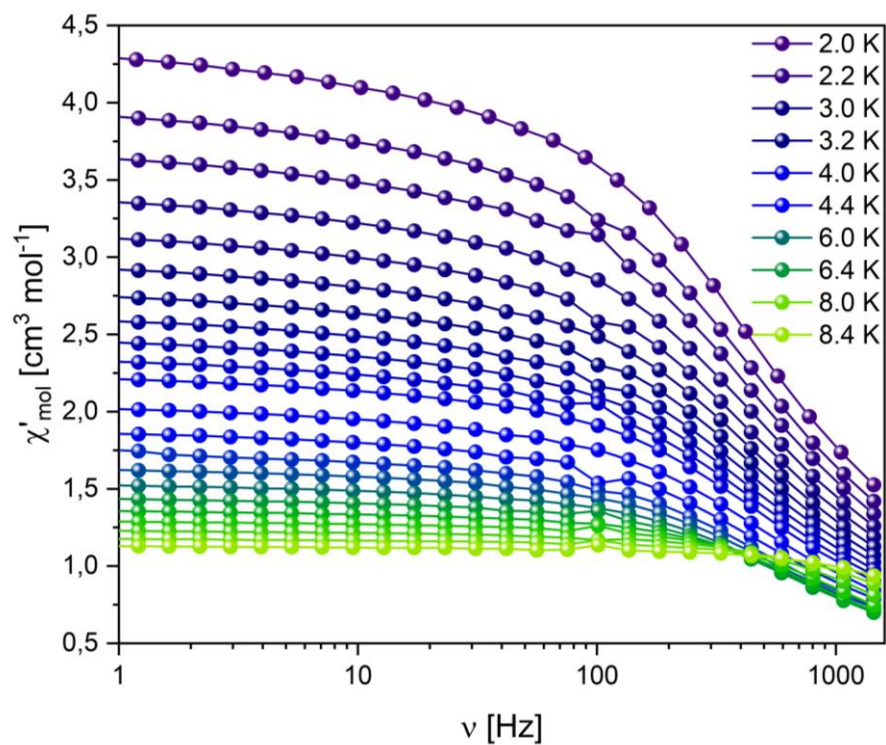

**Figure S66.** In-phase-component of the mag. susceptibility vs frequency for [Li(12-c-4)<sub>2</sub>][(η<sup>5</sup>-L<sup>Pb</sup>)Er(η<sup>8</sup>-COT<sup>TIPS</sup>)] (**10**) (H<sub>DC</sub> = 0 Oe).

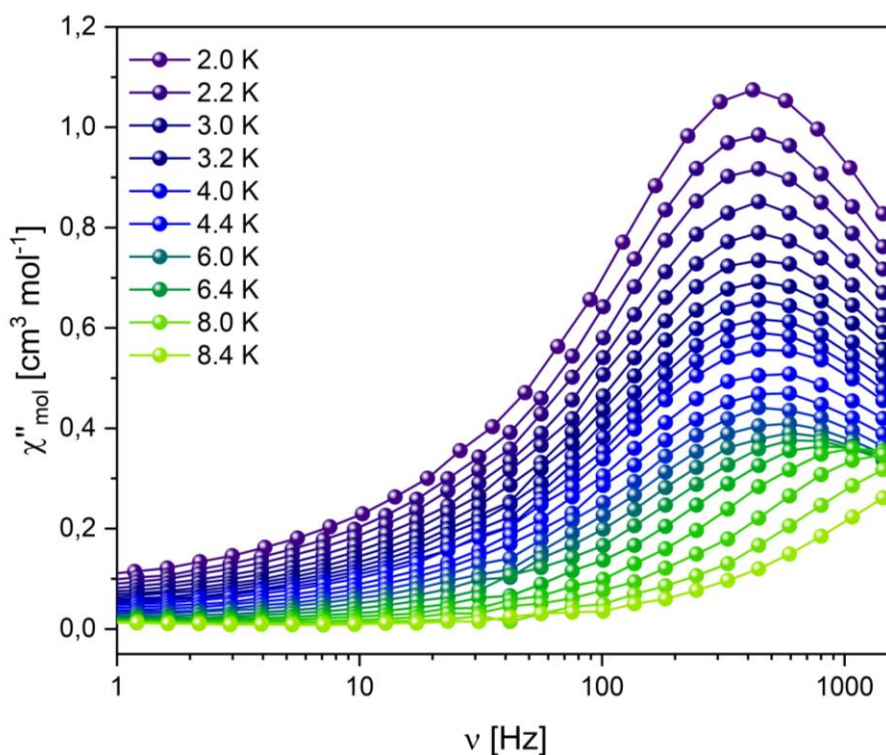

**Figure S67.** Out-of-phase-component of the mag. susceptibility vs frequency for [Li(12-c-4)<sub>2</sub>][(η<sup>5</sup>-L<sup>Pb</sup>)Er(η<sup>8</sup>-COT<sup>TIPS</sup>)] (**10**) (H<sub>DC</sub> = 0 Oe).



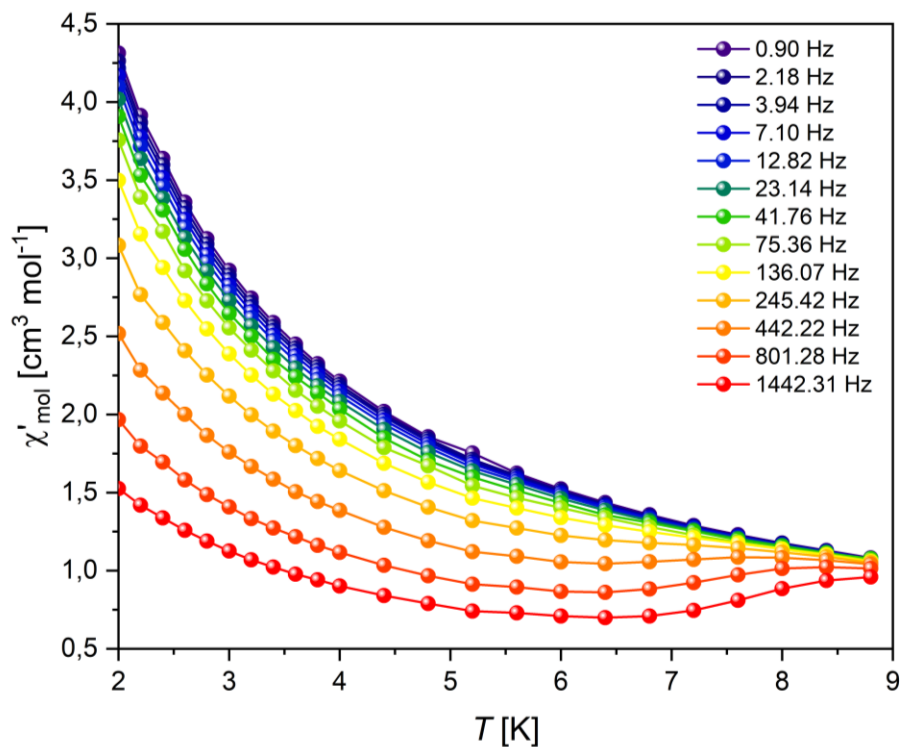

**Figure S68.** In-phase-component of the mag. susceptibility vs Temperature for [Li(12-c-4)<sub>2</sub>][(η<sup>5</sup>-L<sup>Pb</sup>)Er(η<sup>8</sup>-COT<sup>TIPS</sup>)] (**10**) (H<sub>DC</sub> = 0 Oe).

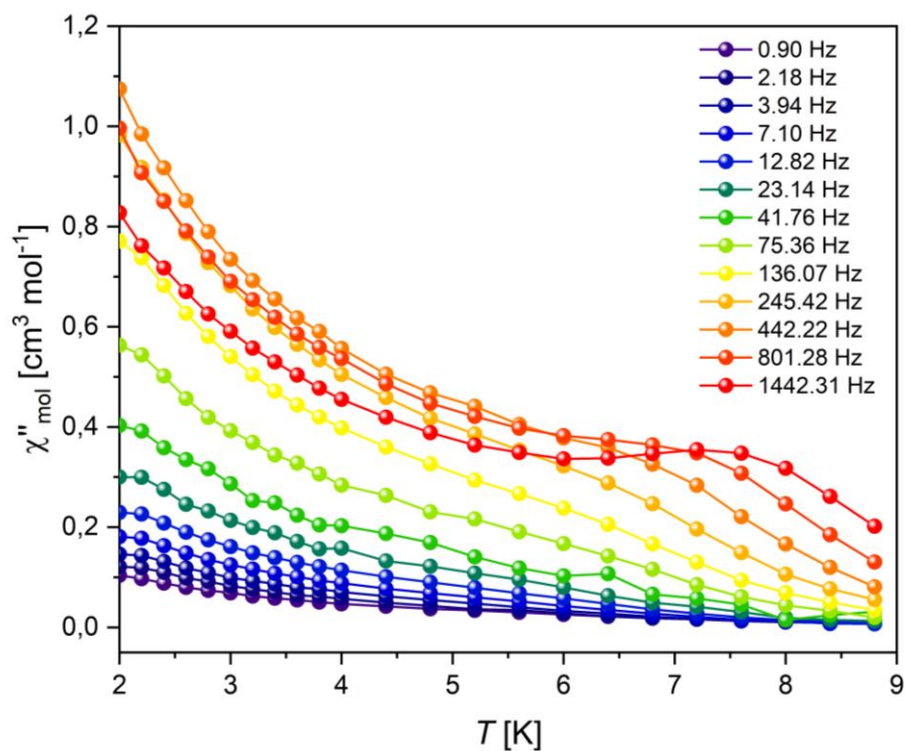

**Figure S69.** Out-of-phase-component of the mag. susceptibility vs temperature for [Li(12-c-4)<sub>2</sub>][(η<sup>5</sup>-L<sup>Pb</sup>)Er(η<sup>8</sup>-COT<sup>TIPS</sup>)] (**10**) (H<sub>bc</sub> = 0 Oe).

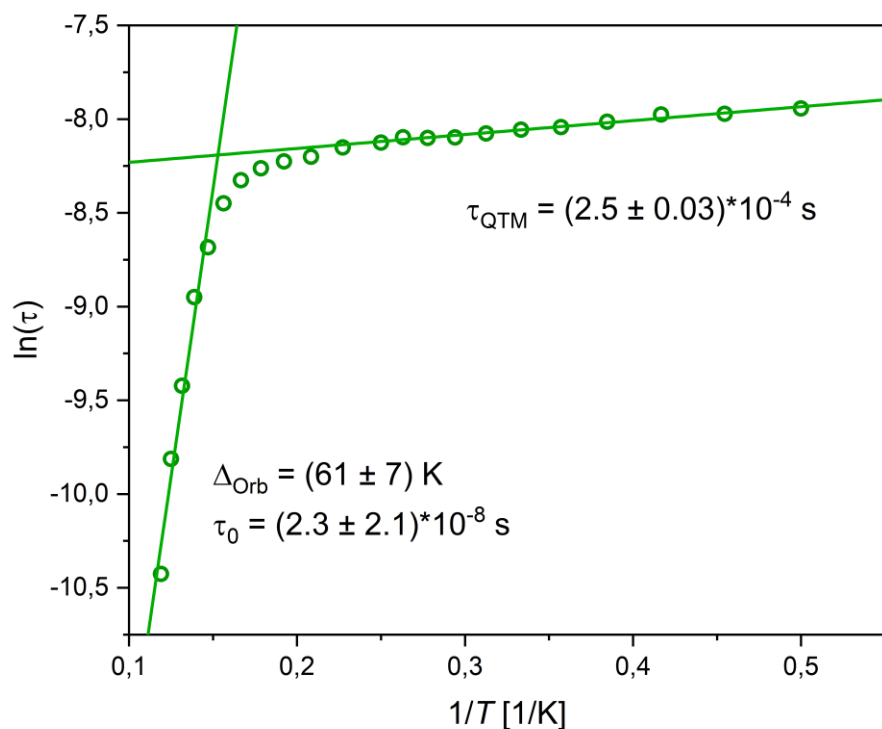

**Figure S70.** Arrhenius plot for  $[\text{Li}(12\text{-c-}4)_2][(\eta^5\text{-L}^{\text{Pb}})\text{Er}(\eta^8\text{-COT}^{\text{TIPS}})]$  (**10**).

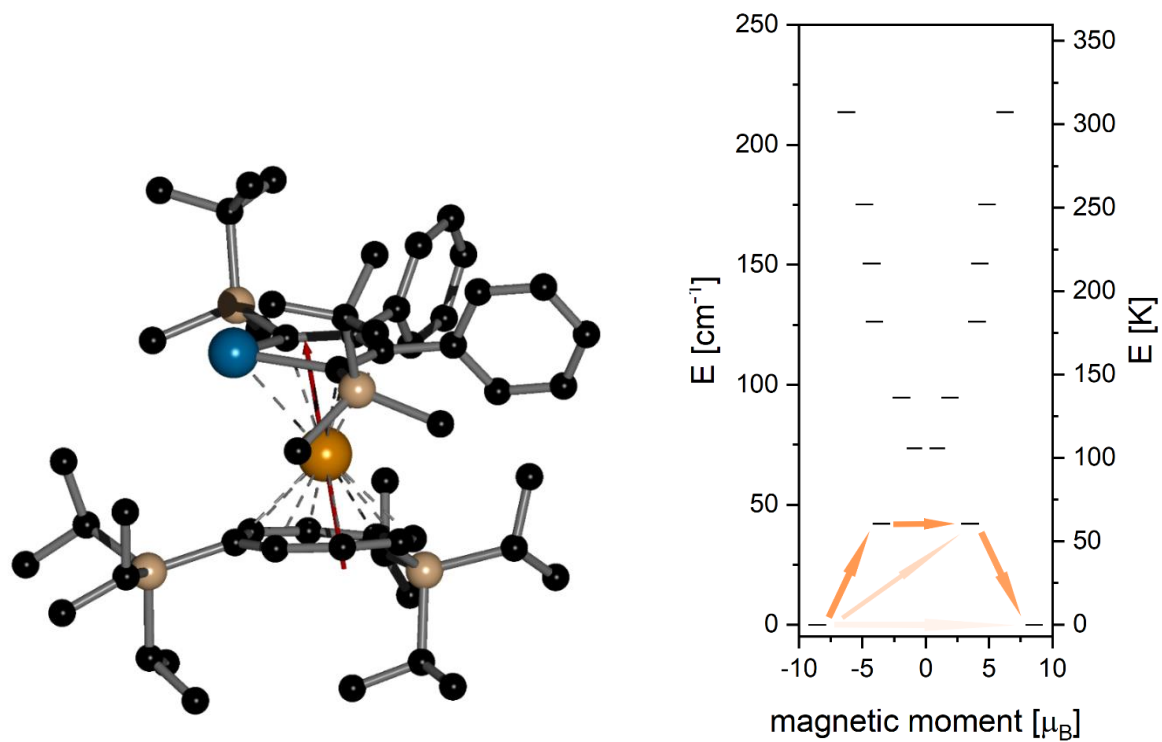

**Figure S71.** Left: Magnetic anisotropy axis of  $[\text{Li}(12\text{-c-}4)_2][(\eta^5\text{-L}^{\text{Pb}})\text{Er}(\eta^8\text{-COT}^{\text{TIPS}})]$  (**10**) Right: *Ab initio* states.

**Table S19.** Fitting parameters for [Li(thf)( $\eta^5$ -L<sup>Pb</sup>)Ce( $\eta^8$ -COT<sup>TIPS</sup>)] (**6**). ( $H_{DC} = 750$  Oe)

| T/K | $\chi_T$ | $\chi_S$ | $\tau$   | $\alpha$ |
|-----|----------|----------|----------|----------|
| 2   | 2,29E-01 | 1,38E-21 | 5,49E-03 | 3,21E-01 |
| 2.2 | 2,12E-01 | 1,43E-23 | 4,85E-03 | 3,18E-01 |
| 2.4 | 1,99E-01 | 1,91E-29 | 4,37E-03 | 2,99E-01 |
| 2.6 | 1,84E-01 | 9,66E-04 | 3,73E-03 | 2,77E-01 |
| 2.8 | 1,71E-01 | 1,93E-03 | 3,00E-03 | 2,47E-01 |
| 3   | 1,59E-01 | 2,96E-03 | 2,47E-03 | 2,10E-01 |
| 3.2 | 1,49E-01 | 3,98E-03 | 1,94E-03 | 1,74E-01 |
| 3.4 | 1,40E-01 | 4,22E-03 | 1,51E-03 | 1,46E-01 |
| 3.6 | 1,32E-01 | 4,52E-03 | 1,19E-03 | 1,22E-01 |
| 3.8 | 1,25E-01 | 4,43E-03 | 9,10E-04 | 1,01E-01 |
| 4   | 1,18E-01 | 4,10E-03 | 7,00E-04 | 7,72E-02 |
| 4.4 | 1,07E-01 | 4,56E-03 | 4,24E-04 | 4,41E-02 |
| 4.8 | 9,84E-02 | 7,96E-04 | 2,50E-04 | 5,55E-02 |
| 5.2 | 9,15E-02 | 3,64E-03 | 1,67E-04 | 2,21E-02 |
| 5.6 | 8,47E-02 | 2,89E-04 | 1,05E-04 | 2,57E-02 |
| 6   | 7,94E-02 | 1,01E-03 | 7,04E-05 | 2,49E-02 |

**Table S20.** CASSCF states, axes, g-tensors for [Li(thf)( $\eta^5$ -L<sup>Pb</sup>)Ce( $\eta^8$ -COT<sup>TIPS</sup>)] (**6**).

| Doublet state | $\Delta E/cm^{-1}$ | $\Delta E/K$ | Angle between magnetic z-axes/ $^\circ$ | $g_x$  | $g_y$  | $g_z$  | Wavefunction composition                                        |
|---------------|--------------------|--------------|-----------------------------------------|--------|--------|--------|-----------------------------------------------------------------|
| 1             | 0                  | 0            | -                                       | 0.0725 | 0.4394 | 3.7015 | $\mp 89\%  5/2\rangle \mp 11\%  1/2\rangle$                     |
| 2             | 358.16             | 515.03       | 72.65                                   | 0.2724 | 0.7035 | 3.1321 | $\pm 60\%  1/2\rangle \mp 35\%  3/2\rangle \pm 5\%  1/2\rangle$ |
| 3             | 602.95             | 867.04       | 83.48                                   | 0.5680 | 1.6641 | 3.1215 | $\pm 64\%  3/2\rangle \mp 30\%  1/2\rangle \mp 6\%  5/2\rangle$ |

**Table S21.** Transition probabilities within the lowest three doublet states for [Li(thf)( $\eta^5$ -L<sup>Pb</sup>)Ce( $\eta^8$ -COT<sup>TIPS</sup>)] (**6**).

|   | 1          | 2          | 3          | 4          | 5          | 6          |
|---|------------|------------|------------|------------|------------|------------|
| 1 |            | 0.1662E-01 | 0.3737E+00 | 0.9888E-01 | 0.1756E+00 | 0.2477E+00 |
| 2 | 0.1662E-01 |            | 0.9888E-01 | 0.3737E+00 | 0.2477E+00 | 0.1756E+00 |
| 3 | 0.3737E+00 | 0.9888E-01 |            | 0.7736E+00 | 0.2146E+00 | 0.4829E+00 |
| 4 | 0.9888E-01 | 0.3737E+00 | 0.7736E+00 |            | 0.4829E+00 | 0.2146E+00 |
| 5 | 0.1756E+00 | 0.2477E+00 | 0.2146E+00 | 0.4829E+00 |            | 0.8541E+00 |
| 6 | 0.2477E+00 | 0.1756E+00 | 0.4829E+00 | 0.2146E+00 | 0.8541E+00 |            |

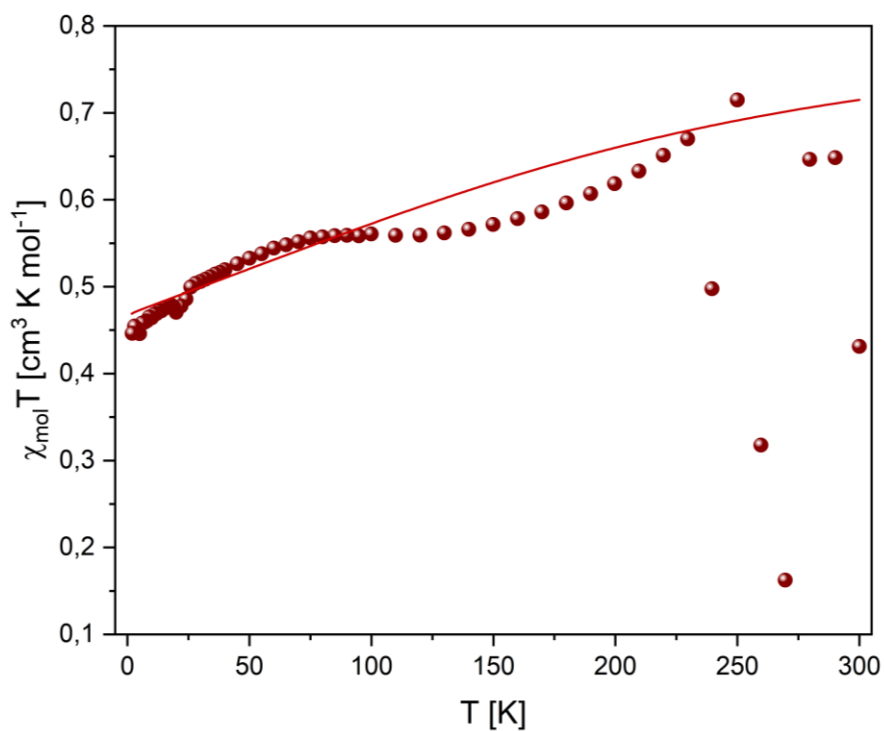

**Figure S72.** Susceptibility for  $[\text{Li}(\text{thf})(\eta^5\text{-L}^{\text{Pb}})\text{Ce}(\eta^8\text{-COT}^{\text{TIPS}})]$  (**6**). Due to the small moment of the sample centering of the sample was lost at high T, leading to the observed behaviour.

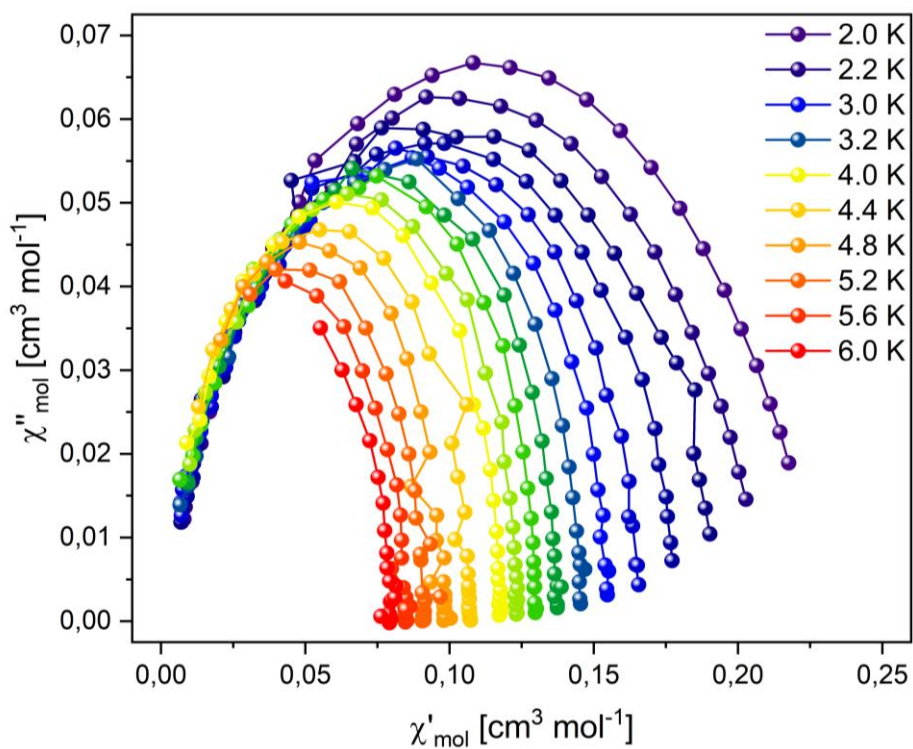

**Figure S73.** Cole-Cole plot for  $[\text{Li}(\text{thf})(\eta^5\text{-L}^{\text{Pb}})\text{Ce}(\eta^8\text{-COT}^{\text{TIPS}})]$  (**6**) ( $H_{\text{dc}} = 750$  Oe).





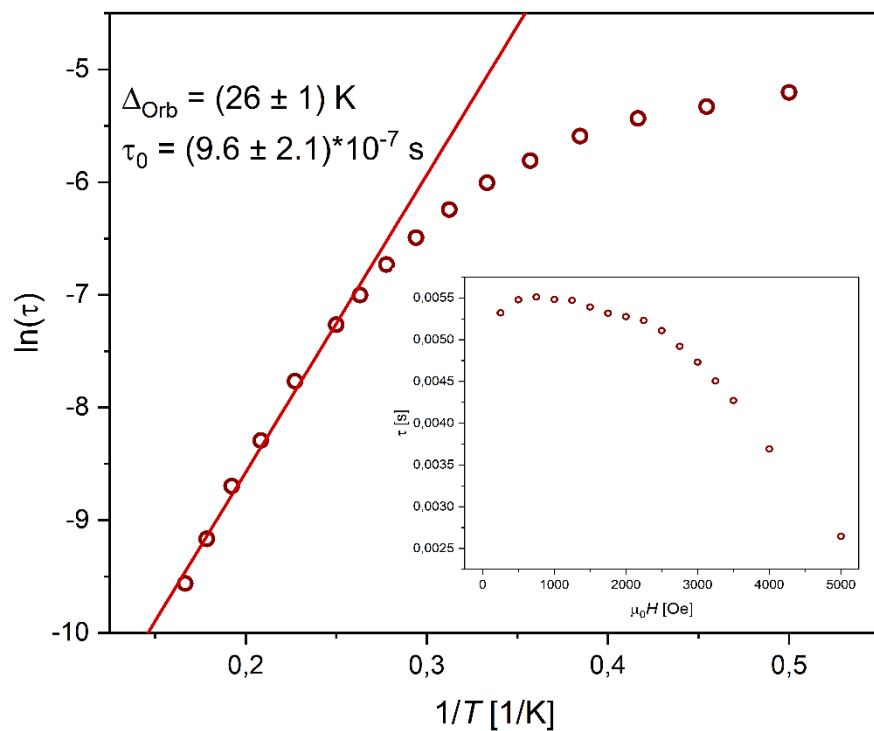

**Figure S78.** Arrhenius plot ( $H_{\text{DC}} = 750 \text{ Oe}$ ) and  $\tau$  vs field for  $[\text{Li}(\text{thf})(\eta^5\text{-L}^{\text{Pb}})\text{Ce}(\eta^8\text{-COT}^{\text{TIPS}})]$  (**6**).

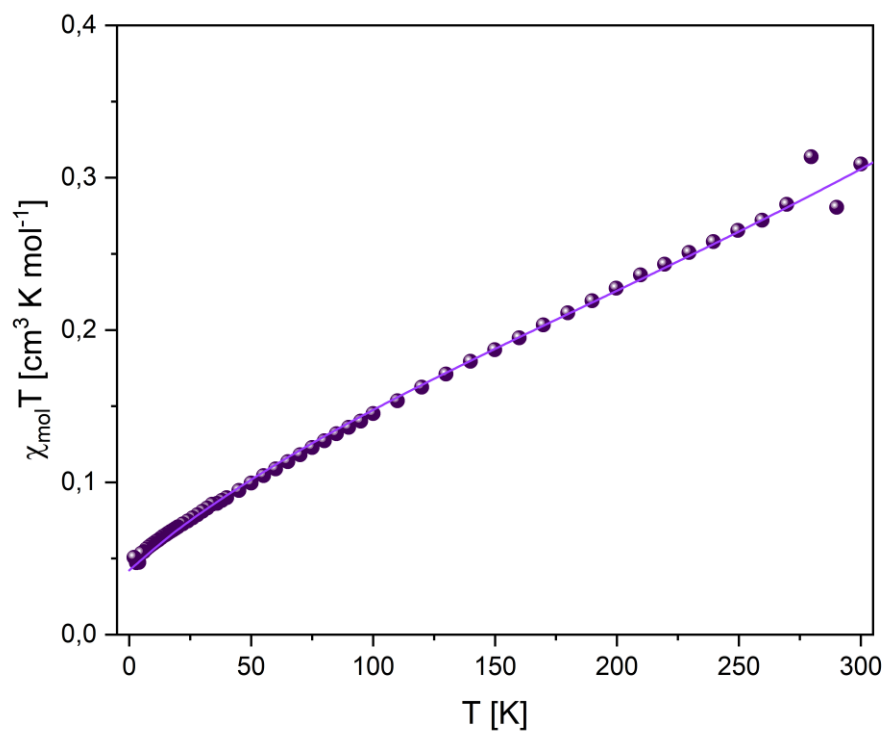

**Figure S79.** Susceptibility for  $[\text{Li}(\text{thf})(\eta^5\text{-L}^{\text{Pb}})\text{Sm}(\eta^8\text{-COT}^{\text{TIPS}})]$  (**7**).

**Table S22.** CASSCF states, axes, g-tensors for [Li(thf)( $\eta^5$ -L<sup>Pb</sup>)Sm( $\eta^8$ -COT<sup>TIPS</sup>)] (7).

| Doublet state | $\Delta E/\text{cm}^{-1}$ | $\Delta E/\text{K}$ | Angle between magnetic z-axes/ $^\circ$ | $g_x$  | $g_y$  | $g_z$  | Wavefunction composition                                         |
|---------------|---------------------------|---------------------|-----------------------------------------|--------|--------|--------|------------------------------------------------------------------|
| 1             | 0                         | 0                   | -                                       | 0.1957 | 0.2836 | 1.1093 | $\mp 69\%  5/2\rangle \mp 17\%  1/2\rangle \mp 13\%  3/2\rangle$ |
| 2             | 46.20                     | 66.43               | 34.29                                   | 0.2519 | 0.4909 | 0.7338 | $\pm 55\%  3/2\rangle \pm 43\%  1/2\rangle \mp 1\%  5/2\rangle$  |
| 3             | 135.87                    | 195.39              | 57.57                                   | 0.1210 | 0.2510 | 1.3694 | $\mp 40\%  1/2\rangle \mp 31\%  3/2\rangle \mp 29\%  5/2\rangle$ |

**Table S23.** Transition probabilities within the lowest three doublet states for [Li(thf)( $\eta^5$ -L<sup>Pb</sup>)Sm( $\eta^8$ -COT<sup>TIPS</sup>)] (7).

|   | 1          | 2          | 3          | 4          | 5          | 6          |
|---|------------|------------|------------|------------|------------|------------|
| 1 |            | 0.7071E-02 | 0.1262E-01 | 0.1735E-01 | 0.5277E-01 | 0.3978E-02 |
| 2 | 0.7071E-02 |            | 0.1735E-01 | 0.1262E-01 | 0.3978E-02 | 0.5277E-01 |
| 3 | 0.1262E-01 | 0.1735E-01 |            | 0.2580E-01 | 0.3994E-01 | 0.6256E-01 |
| 4 | 0.1735E-01 | 0.1262E-01 | 0.2580E-01 |            | 0.6256E-01 | 0.3994E-01 |
| 5 | 0.5277E-01 | 0.3978E-02 | 0.3994E-01 | 0.6256E-01 |            | 0.1546E-01 |
| 6 | 0.3978E-02 | 0.5277E-01 | 0.6256E-01 | 0.3994E-01 | 0.1546E-01 |            |







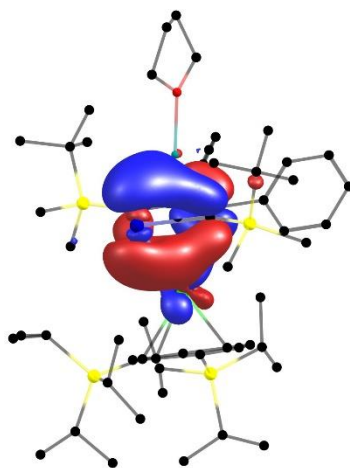

**Figure S82.** Highest occupied  $\alpha$ -orbital of  $[\text{Li}(\text{thf})(\eta^5\text{-L}^{\text{Pb}})\text{Sm}(\eta^8\text{-COT}^{\text{TIPS}})]$  (**7**). See also Figure S81.

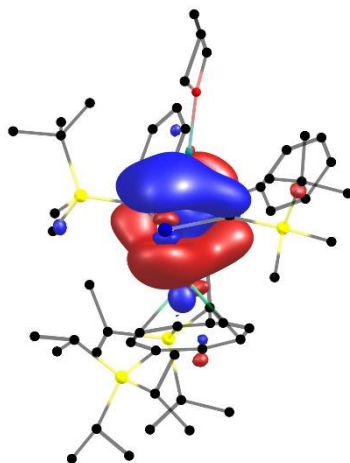

**Figure S83.** Highest occupied  $\alpha$ -orbital of  $[\text{Li}(\text{thf})(\eta^5\text{-L}^{\text{Pb}})\text{Er}(\eta^8\text{-COT}^{\text{TIPS}})]$  (**8**). See also Figure S81.

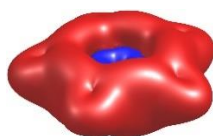

**Figure S84.** Signed modulus of the current density of the free cyclopentadienyl anion. Contours are drawn at 0.03 a.u.. Diatropic contributions are shown in red, paratropic contributions in blue. The magnetic field is perpendicular to the ring plane. Hydrogen atoms are omitted for clarity.

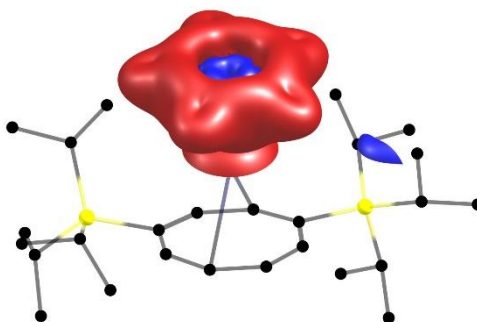

**Figure S85.** Signed modulus of the current density of the hypothetical compound  $[(\eta^5\text{-Cp})\text{La}(\eta^8\text{-COT}^{\text{iPS}})]$ . Colors: C black, Si yellow. See also Figure S83.

**Table S24.** Cartesian coordinates of the optimized structures (level PBE0/def2-TZVP).

(L<sup>Pb</sup>)<sup>2-</sup>

|    |            |            |            |
|----|------------|------------|------------|
| Pb | 0.3218400  | 1.8599900  | 0.0338800  |
| C  | 1.4379700  | -0.0736500 | -0.0840300 |
| C  | -1.3801600 | 0.4201600  | 0.0909400  |
| C  | 0.5271100  | -1.1313300 | -0.0883500 |
| C  | -0.8881000 | -0.8891100 | 0.0036300  |
| Si | 3.2724400  | -0.0360600 | -0.0947400 |
| Si | -3.0720200 | 1.1168300  | -0.0891400 |
| C  | 1.0121400  | -2.5427400 | -0.0789400 |
| C  | -1.8104400 | -2.0540800 | -0.0113200 |
| C  | 4.0250100  | 0.4475800  | -1.8181400 |
| C  | 4.1679800  | -1.6130600 | 0.4704600  |
| C  | 3.8930200  | 1.2877500  | 1.1142200  |
| C  | -3.9354000 | 0.7108100  | -1.7830400 |
| C  | -4.3381900 | 0.6955800  | 1.2680000  |
| C  | -2.9962000 | 3.0103400  | 0.0194700  |
| C  | 1.6114500  | -3.1222700 | -1.1986300 |
| C  | 0.8959300  | -3.3368600 | 1.0654400  |
| C  | -1.8438100 | -2.9572300 | -1.0811200 |
| C  | -2.6962400 | -2.2912300 | 1.0443200  |
| C  | 3.7672900  | 1.9233700  | -2.1152000 |
| C  | 3.3896600  | -0.3870600 | -2.9268300 |
| C  | 5.5352500  | 0.2089600  | -1.8262500 |
| H  | 3.7097800  | -1.9874100 | 1.3905200  |
| H  | 5.2220600  | -1.3998200 | 0.6756400  |
| H  | 4.1133400  | -2.4173700 | -0.2659500 |
| H  | 3.3841300  | 2.2412700  | 0.9501300  |
| H  | 4.9734800  | 1.4462000  | 1.0238900  |
| H  | 3.6828000  | 0.9751200  | 2.1416500  |
| H  | -4.5890400 | -0.3658200 | 1.2965000  |
| H  | -4.0052200 | 3.4321600  | 0.0570200  |
| H  | -2.4700600 | 3.4525000  | -0.8302300 |
| C  | -4.6921200 | -0.6157300 | -1.7118600 |
| H  | -3.3525500 | 0.4111800  | -3.8540000 |
| C  | -4.9408400 | 1.8034800  | -2.1498600 |
| C  | -2.8802900 | 0.6247400  | -2.8838200 |
| H  | -5.2631600 | 1.2624000  | 1.1133600  |
| H  | -3.9376100 | 0.9748100  | 2.2483400  |
| H  | -2.4666700 | 3.3128500  | 0.9274800  |
| H  | 1.7012100  | -2.5303200 | -2.1020900 |
| C  | 2.0797700  | -4.4283200 | -1.1801200 |
| C  | 1.3658300  | -4.6422200 | 1.0960900  |
| H  | 0.4250000  | -2.9157500 | 1.9482200  |

|   |            |            |            |
|---|------------|------------|------------|
| C | -2.7210200 | -4.0310700 | -1.1010500 |
| H | -1.1691900 | -2.8004100 | -1.9150900 |
| H | -2.6805900 | -1.6163600 | 1.8929200  |
| C | -3.5772700 | -3.3629000 | 1.0328200  |
| H | 2.6978800  | 2.1570800  | -2.0807800 |
| H | 4.1417700  | 2.1819900  | -3.1158800 |
| H | 4.2716900  | 2.5757100  | -1.3961300 |
| H | 3.6072500  | -1.4522500 | -2.8045700 |
| H | 3.7775300  | -0.0820300 | -3.9091500 |
| H | 2.3022500  | -0.2665800 | -2.9326200 |
| H | 6.0444100  | 0.7755700  | -1.0403200 |
| H | 5.9657600  | 0.5249300  | -2.7868400 |
| H | 5.7817700  | -0.8472900 | -1.6878100 |
| H | -5.5102600 | -0.5714400 | -0.9870500 |
| H | -4.0441800 | -1.4485700 | -1.4312400 |
| H | -5.1351200 | -0.8483200 | -2.6914300 |
| H | -5.4616300 | 1.5401000  | -3.0815200 |
| H | -4.4573600 | 2.7713500  | -2.3053100 |
| H | -5.7050800 | 1.9337300  | -1.3766700 |
| H | -2.1488000 | -0.1581600 | -2.6693800 |
| H | -2.3229000 | 1.5622000  | -2.9802400 |
| H | 2.5365800  | -4.8504300 | -2.0703100 |
| C | 1.9630000  | -5.1979900 | -0.0288600 |
| H | 1.2669700  | -5.2305300 | 2.0035500  |
| H | -2.7271400 | -4.7054800 | -1.9522400 |
| C | -3.5982700 | -4.2421900 | -0.0435000 |
| H | -4.2482000 | -3.5180100 | 1.8725400  |
| H | 2.3297800  | -6.2189700 | -0.0093100 |
| H | -4.2872000 | -5.0802600 | -0.0569300 |

**[( $\eta^5$ -L<sup>Pb</sup>)La( $\eta^8$ -COT<sup>TIPS</sup>)]<sup>-</sup>**

|    |            |            |            |
|----|------------|------------|------------|
| Pb | 1.2976900  | -1.3788000 | 0.1813800  |
| La | -0.0934800 | 0.1548900  | -2.5450000 |
| C  | 1.1271100  | 0.9110600  | 0.0118900  |
| C  | -0.9607900 | -1.0587600 | -0.1006100 |
| C  | -0.2347200 | 1.3235000  | 0.0241600  |
| C  | -1.2927800 | 0.3331600  | -0.0355800 |
| C  | 1.3223600  | -1.3993900 | -4.4136700 |
| C  | -0.0572300 | -1.5052600 | -4.7693700 |
| C  | -1.1423600 | -0.6258400 | -5.0365800 |
| C  | -1.3772300 | 0.7826200  | -5.0576800 |
| C  | -0.5165100 | 1.8773200  | -4.7340600 |
| C  | 0.8379900  | 2.0325400  | -4.3555800 |
| C  | 1.9247000  | 1.1539800  | -4.1213600 |

|    |            |            |            |
|----|------------|------------|------------|
| C  | 2.1222600  | -0.2487400 | -4.1442600 |
| Si | 2.7051800  | 1.8829000  | 0.1545000  |
| Si | -1.9838200 | -2.5893200 | 0.1605300  |
| C  | -0.6020100 | 2.7841000  | 0.0270500  |
| C  | -2.7164700 | 0.7923000  | 0.0414700  |
| Si | 2.2522900  | -3.0604800 | -4.5433400 |
| H  | -0.3896000 | -2.5419400 | -4.8732300 |
| H  | -2.0366200 | -1.2069400 | -5.2771900 |
| Si | -2.9492200 | 1.2966400  | -6.0038100 |
| H  | -1.0168700 | 2.8484800  | -4.7791900 |
| H  | 1.0975700  | 3.0758100  | -4.1535800 |
| H  | 2.8180800  | 1.6903900  | -3.7907100 |
| H  | 3.1377200  | -0.4989200 | -3.8362900 |
| C  | 3.4166100  | 1.9534100  | 1.9848300  |
| C  | 2.6497100  | 3.6693400  | -0.5096500 |
| C  | 4.0700700  | 1.0179900  | -0.8486200 |
| C  | -2.8794700 | -2.6860600 | 1.9028600  |
| C  | -3.3092800 | -2.9802800 | -1.1609600 |
| C  | -0.8360500 | -4.1075700 | 0.0855300  |
| C  | -0.4901200 | 3.5547600  | 1.1973800  |
| C  | -1.0607900 | 3.4396300  | -1.1279800 |
| C  | -3.1808900 | 1.5243300  | 1.1530300  |
| C  | -3.6544100 | 0.4840800  | -0.9586500 |
| C  | 1.6167100  | -4.3663400 | -3.2615600 |
| C  | 1.8981500  | -3.7219700 | -6.3278900 |
| C  | 4.1597700  | -2.9429800 | -4.2832600 |
| C  | -2.4364400 | 1.5259700  | -7.8530000 |
| C  | -4.2796900 | -0.1032500 | -5.9982300 |
| C  | -3.6176000 | 3.0056900  | -5.4056400 |
| C  | 3.9288600  | 0.5692800  | 2.4139500  |
| C  | 2.3577900  | 2.4086600  | 2.9979200  |
| C  | 4.5936000  | 2.9448800  | 2.0325400  |
| H  | 2.1984300  | 3.6742400  | -1.5136600 |
| H  | 3.6654900  | 4.0861000  | -0.5962000 |
| H  | 2.0513000  | 4.3451700  | 0.1174900  |
| H  | 4.1311400  | -0.0543400 | -0.6116000 |
| H  | 5.0575800  | 1.4685900  | -0.6600700 |
| H  | 3.8616200  | 1.1049400  | -1.9242700 |
| H  | -4.1159500 | -2.2360000 | -1.1964600 |
| H  | -1.4294900 | -5.0346200 | 0.0603100  |
| H  | -0.1525200 | -4.1658200 | 0.9457100  |
| C  | -4.2510700 | -1.9915700 | 1.8760600  |
| H  | -2.4770700 | -2.1316900 | 3.9759800  |
| C  | -3.1082400 | -4.1609800 | 2.2833900  |

|   |            |            |            |
|---|------------|------------|------------|
| C | -2.0017100 | -2.0323400 | 2.9813000  |
| H | -3.7670100 | -3.9648300 | -0.9695800 |
| H | -2.8434000 | -3.0246800 | -2.1585600 |
| H | -0.2174700 | -4.0820800 | -0.8223300 |
| H | -0.1547200 | 3.0681000  | 2.1132900  |
| C | -0.8093200 | 4.9130600  | 1.2120200  |
| C | -1.3826500 | 4.7989000  | -1.1240600 |
| H | -1.1752100 | 2.8884600  | -2.0679900 |
| C | -4.5119300 | 1.9281600  | 1.2550500  |
| H | -2.4810700 | 1.7663600  | 1.9534600  |
| H | -3.3357200 | -0.0929900 | -1.8306300 |
| C | -4.9879200 | 0.8859600  | -0.8635100 |
| H | 1.5470400  | -3.7798500 | -2.3245600 |
| C | 0.2153800  | -4.9237000 | -3.5621300 |
| C | 2.5765300  | -5.5388800 | -2.9930700 |
| C | 4.6010600  | -2.5602600 | -2.8593900 |
| C | 4.9436400  | -2.1304900 | -5.3274200 |
| H | 0.8426500  | -4.0500600 | -6.2754300 |
| C | 1.9690300  | -2.6471000 | -7.4240900 |
| C | 2.7334200  | -4.9510700 | -6.7201200 |
| H | 4.4501400  | -4.0018200 | -4.4305400 |
| H | -3.3602300 | 1.8197300  | -8.3871400 |
| C | -1.9234500 | 0.2243800  | -8.4880000 |
| C | -1.4072500 | 2.6502100  | -8.0480100 |
| C | -4.1604300 | 3.0083100  | -3.9699100 |
| H | -5.1178300 | 2.4697800  | -3.9023100 |
| C | -5.4839000 | 0.1840600  | -6.9112300 |
| H | -3.7447000 | -0.9608200 | -6.4479300 |
| C | -4.7626600 | -0.5516600 | -4.6120600 |
| H | -2.7179900 | 3.6493500  | -5.4135500 |
| C | -4.6257900 | 3.6671500  | -6.3607000 |
| H | 3.1292000  | -0.1879100 | 2.3934900  |
| H | 4.3190600  | 0.6124800  | 3.4486200  |
| H | 4.7439600  | 0.2106600  | 1.7677800  |
| H | 1.9903600  | 3.4228200  | 2.7792400  |
| H | 2.7863400  | 2.4258200  | 4.0182100  |
| H | 1.4956100  | 1.7246000  | 3.0099400  |
| H | 5.3939400  | 2.6740400  | 1.3262800  |
| H | 5.0407900  | 2.9556900  | 3.0446700  |
| H | 4.2756100  | 3.9726500  | 1.8015300  |
| H | -4.9355800 | -2.4705800 | 1.1593100  |
| H | -4.1799900 | -0.9282600 | 1.6122200  |
| H | -4.7244300 | -2.0547400 | 2.8747800  |
| H | -3.6618400 | -4.2205900 | 3.2398000  |



|   |            |            |            |
|---|------------|------------|------------|
| H | -2.1636700 | -4.7087500 | 2.4137800  |
| H | -3.7059200 | -4.6962700 | 1.5279600  |
| H | -1.8459800 | -0.9623800 | 2.7831500  |
| H | -1.0055000 | -2.4991200 | 3.0397800  |
| H | -0.7143500 | 5.4802100  | 2.1412300  |
| C | -1.2549400 | 5.5460800  | 0.0480600  |
| H | -1.7360800 | 5.2724700  | -2.0428100 |
| H | -4.8395700 | 2.4877500  | 2.1343300  |
| C | -5.4262500 | 1.6116400  | 0.2464100  |
| H | -5.6869500 | 0.6303500  | -1.6626700 |
| H | 0.1884300  | -5.4613600 | -4.5239500 |
| H | -0.5534400 | -4.1394500 | -3.5930600 |
| H | -0.0899000 | -5.6414100 | -2.7817100 |
| H | 2.1805600  | -6.1723800 | -2.1806100 |
| H | 3.5800200  | -5.2103100 | -2.6904100 |
| H | 2.6920500  | -6.1870300 | -3.8763000 |
| H | 4.7865300  | -2.5052500 | -6.3487500 |
| H | 6.0272300  | -2.1830800 | -5.1203300 |
| H | 4.0437500  | -3.0962900 | -2.0779600 |
| H | 5.6744500  | -2.7766100 | -2.7165500 |
| H | 4.4626500  | -1.4882900 | -2.6601300 |
| H | 4.6617900  | -1.0673300 | -5.3229800 |
| H | 2.9951300  | -2.2770100 | -7.5698200 |
| H | 1.3377400  | -1.7804500 | -7.1844500 |
| H | 1.6316700  | -3.0568400 | -8.3926400 |
| H | 2.6161800  | -5.7840000 | -6.0117600 |
| H | 3.8077600  | -4.7125000 | -6.7712200 |
| H | 2.4394500  | -5.3231900 | -7.7176200 |
| H | -1.0318700 | -0.1499200 | -7.9620000 |
| H | -1.6419800 | 0.3866500  | -9.5433000 |
| H | -2.6771900 | -0.5772100 | -8.4690900 |
| H | -1.7703000 | 3.6213900  | -7.6783800 |
| H | -1.1614100 | 2.7752500  | -9.1172800 |
| H | -0.4702000 | 2.4257200  | -7.5165300 |
| H | -5.5772200 | 3.1155300  | -6.3946400 |
| H | -4.3471100 | 4.0376000  | -3.6179500 |
| H | -3.4721400 | 2.5365700  | -3.2551500 |
| H | -6.1163600 | 0.9875400  | -6.5041800 |
| H | -6.1230300 | -0.7115000 | -7.0015000 |
| H | -5.1850900 | 0.4802800  | -7.9274800 |
| H | -3.9289000 | -0.8234200 | -3.9501900 |
| H | -5.4215200 | -1.4336900 | -4.6913100 |
| H | -5.3394400 | 0.2398600  | -4.1113100 |
| H | -4.2483700 | 3.7382200  | -7.3911800 |

|   |            |           |            |
|---|------------|-----------|------------|
| H | -4.8612200 | 4.6914900 | -6.0229600 |
| H | -1.5055900 | 6.6087700 | 0.0564100  |
| H | -6.4692000 | 1.9245900 | 0.3258200  |

**[( $\eta^5$ -L<sup>Pb</sup>)Er( $\eta^8$ -COT<sup>TIPS</sup>)]-**

|    |            |            |            |
|----|------------|------------|------------|
| Pb | 2.3763867  | -1.0019840 | 0.4766384  |
| Er | -0.5406009 | -0.0695930 | -0.4459494 |
| C  | 1.9986375  | 0.4438478  | -1.2289779 |
| C  | 1.1231708  | 0.6185146  | 1.4540524  |
| C  | 1.4208267  | 1.6587994  | -0.7665910 |
| C  | 0.9810484  | 1.7526407  | 0.5933460  |
| C  | -1.4125295 | -2.5348813 | -0.3982675 |
| C  | -2.2195437 | -1.7655800 | 0.4790728  |
| C  | -2.9410751 | -0.5548557 | 0.4244692  |
| C  | -3.1706628 | 0.4804147  | -0.5177506 |
| C  | -2.6193323 | 0.7036236  | -1.8075524 |
| C  | -1.7738783 | 0.0082316  | -2.6863984 |
| C  | -1.1083664 | -1.2286816 | -2.6502566 |
| C  | -0.9713305 | -2.2706440 | -1.7176042 |
| Si | 2.7671355  | 0.0254892  | -2.8600227 |
| Si | 1.0297435  | 0.4818896  | 3.2976412  |
| C  | 1.2468743  | 2.8450419  | -1.6665479 |
| C  | 0.5096505  | 3.0664816  | 1.1192492  |
| Si | -1.1268528 | -4.3023946 | 0.2276566  |
| H  | -2.3142571 | -2.2092348 | 1.4642894  |
| H  | -3.4282965 | -0.3688322 | 1.3762213  |
| Si | -4.7587810 | 1.4689151  | -0.2146078 |
| H  | -2.9099001 | 1.6586802  | -2.2325180 |
| H  | -1.5352892 | 0.5827409  | -3.5759767 |
| H  | -0.4935669 | -1.3805847 | -3.5299582 |
| H  | -0.2904284 | -3.0252332 | -2.0885604 |
| C  | 4.7077383  | 0.2274342  | -2.9079228 |
| C  | 2.0624533  | 0.9423101  | -4.3597839 |
| C  | 2.5237138  | -1.8131378 | -3.2257364 |
| C  | 2.2670862  | 1.6298619  | 4.2628064  |
| C  | -0.6741767 | 0.7257378  | 4.0960038  |
| C  | 1.4831342  | -1.2867963 | 3.7918211  |
| C  | 2.3553363  | 3.5914087  | -2.0667181 |
| C  | -0.0018313 | 3.2663242  | -2.1213072 |
| C  | 1.3550801  | 4.1802327  | 1.0852382  |
| C  | -0.7391916 | 3.2302131  | 1.7147462  |
| C  | -0.1863137 | -4.3744397 | 1.9024465  |
| C  | -2.8846311 | -5.0214220 | 0.4969511  |
| C  | -0.1590172 | -5.4369887 | -0.9700095 |

|   |            |            |            |
|---|------------|------------|------------|
| C | -6.1533029 | 0.5233730  | -1.1308493 |
| C | -5.2708946 | 1.4663882  | 1.6307177  |
| C | -4.6937113 | 3.2093761  | -1.0103830 |
| C | 5.3744367  | -0.8613846 | -2.0677732 |
| C | 5.1851636  | 1.5784679  | -2.3871629 |
| C | 5.1872876  | 0.0801316  | -4.3541344 |
| H | 0.9698833  | 0.9168135  | -4.3221263 |
| H | 2.3784944  | 0.4624338  | -5.2909341 |
| H | 2.3580638  | 1.9929636  | -4.3961494 |
| H | 2.8010451  | -2.4280968 | -2.3665436 |
| H | 3.1288488  | -2.1311034 | -4.0802447 |
| H | 1.4803821  | -2.0280779 | -3.4602607 |
| H | -1.0529156 | 1.7439354  | 3.9978504  |
| H | 1.2869346  | -1.4419902 | 4.8565624  |
| H | 2.5332265  | -1.5252275 | 3.6041473  |
| C | 1.6531258  | 2.9953699  | 4.5693844  |
| H | 4.2691761  | 2.4291082  | 4.0248460  |
| C | 2.6303134  | 0.9783931  | 5.5998889  |
| C | 3.5489156  | 1.8238875  | 3.4560947  |
| H | -0.6333293 | 0.4837354  | 5.1634564  |
| H | -1.3974388 | 0.0476106  | 3.6322087  |
| H | 0.8800153  | -2.0055822 | 3.2353581  |
| H | 3.3327306  | 3.3031080  | -1.7044169 |
| C | 2.2283656  | 4.6950109  | -2.8952730 |
| C | -0.1388286 | 4.3692190  | -2.9518761 |
| H | -0.8898511 | 2.7217492  | -1.8200049 |
| C | 0.9674039  | 5.3986814  | 1.6179454  |
| H | 2.3374445  | 4.0787481  | 0.6412406  |
| H | -1.4178448 | 2.3859413  | 1.7496574  |
| C | -1.1308500 | 4.4453573  | 2.2562873  |
| H | 0.5826723  | -3.5973744 | 1.7947757  |
| C | -1.0357995 | -4.0257157 | 3.1251277  |
| C | 0.5417594  | -5.6925041 | 2.1752291  |
| C | 1.2917462  | -5.0217933 | -1.2196108 |
| C | -0.8438083 | -5.7947514 | -2.2885547 |
| H | -3.2448528 | -4.4794380 | 1.3825858  |
| C | -3.8698096 | -4.7165100 | -0.6295186 |
| C | -2.8993933 | -6.5094218 | 0.8412262  |
| H | -0.1253586 | -6.3640055 | -0.3785653 |
| H | -7.0700758 | 1.1019321  | -0.9496878 |
| C | -6.3760064 | -0.8823770 | -0.5780582 |
| C | -5.9371157 | 0.4637141  | -2.6415843 |
| C | -3.7004229 | 4.1697128  | -0.3651217 |
| H | -4.0374510 | 4.4818851  | 0.6271549  |

|   |            |            |            |
|---|------------|------------|------------|
| C | -6.6591568 | 2.0574827  | 1.8781068  |
| H | -5.3421432 | 0.3957964  | 1.8666453  |
| C | -4.2671029 | 2.0739125  | 2.6045184  |
| H | -4.3370446 | 3.0126483  | -2.0303704 |
| C | -6.0582791 | 3.8825050  | -1.1618411 |
| H | 5.0731447  | -0.8066775 | -1.0176487 |
| H | 6.4668564  | -0.7466933 | -2.1029403 |
| H | 5.1377220  | -1.8649354 | -2.4293100 |
| H | 4.8112481  | 2.4044188  | -2.9976891 |
| H | 6.2830389  | 1.6257636  | -2.4109539 |
| H | 4.8698899  | 1.7411610  | -1.3527686 |
| H | 4.8879917  | -0.8752603 | -4.7945652 |
| H | 6.2845393  | 0.1265198  | -4.3936002 |
| H | 4.8014952  | 0.8777318  | -4.9943686 |
| H | 0.7716016  | 2.9049580  | 5.2102236  |
| H | 1.3563189  | 3.5346710  | 3.6693883  |
| H | 2.3827719  | 3.6207733  | 5.1033191  |
| H | 3.2805439  | 1.6505742  | 6.1770880  |
| H | 3.1654512  | 0.0351599  | 5.4684941  |
| H | 1.7458090  | 0.7780749  | 6.2132435  |
| H | 3.3551203  | 2.3298411  | 2.5080713  |
| H | 4.0303183  | 0.8697120  | 3.2199857  |
| H | 3.1125620  | 5.2546639  | -3.1830075 |
| C | 0.9773879  | 5.0888295  | -3.3492219 |
| H | -1.1270123 | 4.6674458  | -3.2864130 |
| H | 1.6493340  | 6.2416039  | 1.5796293  |
| C | -0.2797101 | 5.5389838  | 2.2105959  |
| H | -2.1105406 | 4.5381127  | 2.7122655  |
| H | -1.8533785 | -4.7403292 | 3.2632985  |
| H | -1.4725086 | -3.0272157 | 3.0713674  |
| H | -0.4245001 | -4.0543672 | 4.0341221  |
| H | 1.1063245  | -5.6200320 | 3.1120374  |
| H | 1.2507821  | -5.9573318 | 1.3899105  |
| H | -0.1544125 | -6.5295536 | 2.2868065  |
| H | -1.8094577 | -6.2795769 | -2.1328933 |
| H | -0.2189653 | -6.4880111 | -2.8648573 |
| H | 1.8032223  | -4.6833785 | -0.3159704 |
| H | 1.8643277  | -5.8585594 | -1.6375625 |
| H | 1.3589595  | -4.2025020 | -1.9372374 |
| H | -1.0178190 | -4.9172569 | -2.9158460 |
| H | -3.6137400 | -5.2461926 | -1.5505348 |
| H | -3.8967484 | -3.6506439 | -0.8626903 |
| H | -4.8841125 | -5.0267979 | -0.3503184 |
| H | -2.2887595 | -6.7400737 | 1.7175277  |

|   |            |            |            |
|---|------------|------------|------------|
| H | -2.5247015 | -7.1188110 | 0.0129013  |
| H | -3.9195944 | -6.8514123 | 1.0541928  |
| H | -5.4744634 | -1.4926860 | -0.6773142 |
| H | -7.1802196 | -1.3921753 | -1.1220229 |
| H | -6.6514455 | -0.8747610 | 0.4798463  |
| H | -5.8394788 | 1.4568838  | -3.0886532 |
| H | -6.7789876 | -0.0368030 | -3.1349720 |
| H | -5.0310120 | -0.0957118 | -2.8875336 |
| H | -6.4856517 | 4.1533175  | -0.1932002 |
| H | -3.5906860 | 5.0808656  | -0.9646589 |
| H | -2.7074839 | 3.7335417  | -0.2469271 |
| H | -6.6626620 | 3.1416022  | 1.7375672  |
| H | -6.9754340 | 1.8697177  | 2.9108490  |
| H | -7.4218911 | 1.6362380  | 1.2191183  |
| H | -3.2818224 | 1.6135733  | 2.5245261  |
| H | -4.6034514 | 1.9440631  | 3.6398182  |
| H | -4.1460137 | 3.1469735  | 2.4374439  |
| H | -6.7847657 | 3.2498580  | -1.6767620 |
| H | -5.9624759 | 4.8101040  | -1.7384966 |
| H | 0.8737343  | 5.9513061  | -3.9984890 |
| H | -0.5837596 | 6.4896869  | 2.6343237  |

**[Li(thf)( $\eta^5$ -L<sup>Pb</sup>)La( $\eta^8$ -COT<sup>TIPS</sup>)] (5)**

|    |            |            |            |
|----|------------|------------|------------|
| Pb | 3.6770562  | 6.1543313  | 11.0019179 |
| La | 1.6301719  | 8.5172776  | 12.3618177 |
| C  | 3.4842835  | 6.3103347  | 13.2895659 |
| C  | 1.4491747  | 5.7357082  | 11.4247414 |
| Li | 2.6338755  | 4.2632325  | 12.6876313 |
| C  | 2.1697900  | 6.0766938  | 13.7704583 |
| C  | 1.1145179  | 5.7843998  | 12.8106462 |
| C  | 2.5588183  | 10.4190576 | 10.6054354 |
| C  | 1.1431087  | 10.4376108 | 10.5129312 |
| C  | 0.0452158  | 10.5370919 | 11.3971712 |
| C  | -0.1661785 | 10.6478955 | 12.7952346 |
| C  | 0.7521414  | 10.6361203 | 13.8777958 |
| C  | 2.1500279  | 10.5881450 | 14.0233974 |
| C  | 3.2433814  | 10.5238569 | 13.1381931 |
| C  | 3.4074881  | 10.4549969 | 11.7408983 |
| Si | 5.0425659  | 6.7258758  | 14.2405266 |
| Si | 0.4193460  | 5.2862061  | 9.9274290  |
| O  | 3.0394984  | 2.4124944  | 13.0173108 |
| C  | 1.8256261  | 6.1381520  | 15.2285135 |
| C  | -0.2537715 | 5.4674266  | 13.3236888 |
| Si | 3.4143602  | 10.6172415 | 8.9137223  |

|    |            |            |            |
|----|------------|------------|------------|
| H  | 0.7871820  | 10.3627764 | 9.4902787  |
| H  | -0.8824522 | 10.5098279 | 10.8348693 |
| Si | -1.8972620 | 11.2839326 | 13.2698922 |
| H  | 0.2681883  | 10.6645175 | 14.8486712 |
| H  | 2.4591555  | 10.5583315 | 15.0638903 |
| H  | 4.1893567  | 10.4661643 | 13.6668099 |
| H  | 4.4550743  | 10.3678966 | 11.4830526 |
| C  | 6.2033636  | 5.2062945  | 14.5596698 |
| C  | 4.7529663  | 7.6092195  | 15.8816076 |
| C  | 6.0741090  | 7.9012311  | 13.1877913 |
| C  | -0.3970794 | 3.5288597  | 9.9247585  |
| C  | -0.9359484 | 6.5408405  | 9.5159796  |
| C  | 1.5685097  | 5.3175778  | 8.4303570  |
| C  | 4.0072437  | 1.7371677  | 12.1937475 |
| C  | 2.4050365  | 1.4746550  | 13.9013374 |
| C  | 2.2413882  | 5.1381559  | 16.1059229 |
| C  | 1.0850992  | 7.1910259  | 15.7620803 |
| C  | -0.4739615 | 4.3717355  | 14.1616337 |
| C  | -1.3595734 | 6.2397075  | 12.9762608 |
| C  | 3.1020204  | 9.1084021  | 7.7667866  |
| C  | 2.6293097  | 12.1790118 | 8.1325634  |
| C  | 5.3101915  | 10.8263300 | 9.0095604  |
| C  | -1.7782870 | 13.1909173 | 13.2888572 |
| C  | -3.1901031 | 10.8386199 | 11.9324689 |
| C  | -2.3739407 | 10.7400596 | 15.0397543 |
| C  | 6.7828282  | 4.6977177  | 13.2405198 |
| C  | 5.4929235  | 4.0512716  | 15.2578933 |
| C  | 7.3617008  | 5.6570052  | 15.4545527 |
| H  | 4.0429109  | 8.4294191  | 15.7460705 |
| H  | 5.6897321  | 8.0393163  | 16.2468419 |
| H  | 4.3501386  | 6.9571474  | 16.6589414 |
| H  | 6.2929783  | 7.4921147  | 12.1986644 |
| H  | 7.0263539  | 8.1314733  | 13.6737799 |
| H  | 5.5406845  | 8.8416989  | 13.0410877 |
| H  | -1.7792307 | 6.5065674  | 10.2069413 |
| H  | 0.9905908  | 5.2040401  | 7.5097685  |
| H  | 2.3167796  | 4.5208548  | 8.4558917  |
| C  | -1.7217654 | 3.4904135  | 10.6850366 |
| H  | 0.1403558  | 1.4896453  | 10.4320616 |
| C  | -0.6803147 | 3.1223519  | 8.4748979  |
| C  | 0.5530367  | 2.5022960  | 10.5348863 |
| H  | -1.3243942 | 6.3527794  | 8.5103551  |
| H  | -0.5366734 | 7.5601881  | 9.5168505  |
| H  | 2.1021204  | 6.2681204  | 8.3617336  |

|   |            |            |            |
|---|------------|------------|------------|
| H | 2.7289399  | 1.6924663  | 14.9244977 |
| C | 4.2398848  | 0.4000519  | 12.8651968 |
| H | 4.8982722  | 2.3636063  | 12.1350051 |
| H | 3.5884560  | 1.6175598  | 11.1892762 |
| H | 1.3236241  | 1.6100448  | 13.8351745 |
| C | 2.8638693  | 0.1012484  | 13.4475211 |
| H | 2.8144504  | 4.3038330  | 15.7198336 |
| C | 1.9394171  | 5.1882829  | 17.4575407 |
| C | 0.7819513  | 7.2529818  | 17.1138334 |
| H | 0.7249111  | 7.9946764  | 15.1244095 |
| C | -1.7415014 | 4.0543635  | 14.6200333 |
| H | 0.3671883  | 3.7615833  | 14.4698731 |
| H | -1.2355486 | 7.0993335  | 12.3250781 |
| C | -2.6320534 | 5.9306755  | 13.4335489 |
| H | 3.2709894  | 8.2460297  | 8.4281176  |
| C | 1.6754182  | 9.0064632  | 7.2275914  |
| C | 4.0822130  | 8.9788235  | 6.5987923  |
| C | 6.0788062  | 9.5932931  | 9.4885371  |
| C | 5.8262635  | 12.0855700 | 9.7052072  |
| H | 1.6196763  | 11.8517089 | 7.8467155  |
| C | 2.4533668  | 13.3475697 | 9.1016899  |
| C | 3.3292904  | 12.6438274 | 6.8559185  |
| H | 5.5469871  | 10.9454929 | 7.9418199  |
| H | -2.7839979 | 13.5431548 | 13.5568880 |
| C | -1.4324896 | 13.7749535 | 11.9206615 |
| C | -0.8088458 | 13.7152344 | 14.3463091 |
| C | -2.5582196 | 9.2362448  | 15.2168366 |
| H | -3.4732164 | 8.8889778  | 14.7302368 |
| C | -4.5503350 | 11.5012898 | 12.1547966 |
| H | -2.7758519 | 11.2857378 | 11.0185670 |
| C | -3.3730773 | 9.3487669  | 11.6616436 |
| H | -1.5055774 | 11.0344808 | 15.6445194 |
| C | -3.5699946 | 11.4936965 | 15.6230218 |
| H | 5.9995722  | 4.4184767  | 12.5283246 |
| H | 7.4073046  | 3.8117707  | 13.4161203 |
| H | 7.4110350  | 5.4474079  | 12.7541932 |
| H | 5.0782392  | 4.3506189  | 16.2239482 |
| H | 6.2008675  | 3.2326253  | 15.4458549 |
| H | 4.6810365  | 3.6464147  | 14.6469263 |
| H | 7.9241291  | 6.4860809  | 15.0178069 |
| H | 8.0668286  | 4.8286532  | 15.6007762 |
| H | 7.0159850  | 5.9700493  | 16.4427134 |
| H | -2.4560189 | 4.1750585  | 10.2533942 |
| H | -1.6083389 | 3.7437929  | 11.7396289 |

|   |            |            |            |
|---|------------|------------|------------|
| H | -2.1502901 | 2.4807615  | 10.6319901 |
| H | -1.2072883 | 2.1597599  | 8.4573030  |
| H | 0.2341467  | 3.0072667  | 7.8893359  |
| H | -1.3180740 | 3.8478752  | 7.9614473  |
| H | 0.7050996  | 2.6862707  | 11.6016595 |
| H | 1.5327147  | 2.5092814  | 10.0459929 |
| H | 2.8860652  | -0.6165440 | 14.2677259 |
| H | 4.9828506  | 0.4975257  | 13.6608428 |
| H | 4.5859775  | -0.3594125 | 12.1638978 |
| H | 2.1976876  | -0.2856440 | 12.6724722 |
| H | 2.2761151  | 4.3931001  | 18.1138254 |
| C | 1.2096010  | 6.2508537  | 17.9703159 |
| H | 0.2067899  | 8.0888978  | 17.4956369 |
| H | -1.8798310 | 3.1945943  | 15.2661829 |
| C | -2.8305398 | 4.8330492  | 14.2551791 |
| H | -3.4706279 | 6.5519973  | 13.1426972 |
| H | 1.4214860  | 9.8670404  | 6.6012973  |
| H | 0.9268323  | 8.9379177  | 8.0185555  |
| H | 1.5639860  | 8.1129516  | 6.6035486  |
| H | 3.8939095  | 8.0480766  | 6.0520775  |
| H | 5.1256595  | 8.9632312  | 6.9163005  |
| H | 3.9690338  | 9.7958512  | 5.8811367  |
| H | 5.4319215  | 12.9965388 | 9.2518338  |
| H | 6.9190455  | 12.1353197 | 9.6384178  |
| H | 5.7220881  | 8.6663099  | 9.0341335  |
| H | 7.1440094  | 9.6910412  | 9.2505904  |
| H | 6.0095608  | 9.4610917  | 10.5702115 |
| H | 5.5651671  | 12.1121985 | 10.7658457 |
| H | 3.4132286  | 13.7639022 | 9.4167517  |
| H | 1.9130401  | 13.0525927 | 10.0028926 |
| H | 1.8923823  | 14.1591982 | 8.6247545  |
| H | 3.3715967  | 11.8639045 | 6.0926417  |
| H | 4.3562666  | 12.9651321 | 7.0532591  |
| H | 2.8052660  | 13.5005976 | 6.4176916  |
| H | -0.4538355 | 13.4278861 | 11.5777948 |
| H | -1.3944763 | 14.8690425 | 11.9647268 |
| H | -2.1641515 | 13.5058129 | 11.1545109 |
| H | -1.0651676 | 13.3760749 | 15.3536159 |
| H | -0.8081654 | 14.8107865 | 14.3612972 |
| H | 0.2144087  | 13.3907420 | 14.1394718 |
| H | -4.4998662 | 11.2363445 | 15.1106654 |
| H | -2.6442986 | 8.9726701  | 16.2769426 |
| H | -1.7306857 | 8.6581612  | 14.8001067 |
| H | -5.0743111 | 11.0662082 | 13.0094084 |



|   |            |            |            |
|---|------------|------------|------------|
| H | -5.1930867 | 11.3562833 | 11.2795347 |
| H | -4.4714250 | 12.5767204 | 12.3281436 |
| H | -2.4261904 | 8.8495967  | 11.4461742 |
| H | -4.0318494 | 9.1863442  | 10.8013539 |
| H | -3.8303011 | 8.8443426  | 12.5162014 |
| H | -3.4514292 | 12.5777550 | 15.5645064 |
| H | -3.7054616 | 11.2351139 | 16.6791151 |
| H | 0.9731231  | 6.2952862  | 19.0269676 |
| H | -3.8243240 | 4.5873094  | 14.6105667 |

**[Li(thf)( $\eta^5$ -L<sup>Pb</sup>)Sm( $\eta^8$ -COT<sup>TIPS</sup>)] (7)**

|    |            |            |            |
|----|------------|------------|------------|
| Pb | 3.6521385  | 6.2665579  | 10.9886589 |
| Sm | 1.6317054  | 8.5133953  | 12.3483587 |
| C  | 3.4808278  | 6.4025831  | 13.2735918 |
| C  | 1.4228998  | 5.8345422  | 11.4334279 |
| Li | 2.6317179  | 4.3568663  | 12.6736376 |
| C  | 2.1709053  | 6.1693599  | 13.7700768 |
| C  | 1.1070721  | 5.8675062  | 12.8223229 |
| C  | 2.5663343  | 10.3139122 | 10.6105177 |
| C  | 1.1537968  | 10.3148358 | 10.5141263 |
| C  | 0.0461171  | 10.4109096 | 11.3859001 |
| C  | -0.1719534 | 10.5265881 | 12.7791681 |
| C  | 0.7385222  | 10.5144509 | 13.8678738 |
| C  | 2.1327621  | 10.4645560 | 14.0197546 |
| C  | 3.2330682  | 10.4110990 | 13.1454294 |
| C  | 3.4050792  | 10.3447390 | 11.7527583 |
| Si | 5.0514750  | 6.7868349  | 14.2188538 |
| Si | 0.3832910  | 5.3639616  | 9.9468017  |
| O  | 3.0266250  | 2.4958925  | 12.9984704 |
| C  | 1.8449897  | 6.2027654  | 15.2337037 |
| C  | -0.2539715 | 5.5361529  | 13.3444225 |
| Si | 3.4267075  | 10.5557691 | 8.9267433  |
| H  | 0.8049539  | 10.2112783 | 9.4912615  |
| H  | -0.8773262 | 10.3632885 | 10.8182120 |
| Si | -1.8970296 | 11.1942459 | 13.2505467 |
| H  | 0.2464840  | 10.5307554 | 14.8350574 |
| H  | 2.4333020  | 10.4111611 | 15.0619373 |
| H  | 4.1723660  | 10.3377273 | 13.6825146 |
| H  | 4.4536015  | 10.2490114 | 11.5009348 |
| C  | 6.1960482  | 5.2490782  | 14.5224911 |
| C  | 4.7826057  | 7.6571059  | 15.8700149 |
| C  | 6.1090006  | 7.9421556  | 13.1698171 |
| C  | -0.4271732 | 3.6026966  | 9.9635010  |
| C  | -0.9774731 | 6.6097389  | 9.5312567  |

|   |            |            |            |
|---|------------|------------|------------|
| C | 1.5267459  | 5.3800259  | 8.4454596  |
| C | 4.0056442  | 1.8193295  | 12.1895771 |
| C | 2.3697706  | 1.5560048  | 13.8641869 |
| C | 2.2584205  | 5.1768600  | 16.0818287 |
| C | 1.1164849  | 7.2470261  | 15.7985989 |
| C | -0.4610983 | 4.4330348  | 14.1760676 |
| C | -1.3677566 | 6.2982953  | 13.0016747 |
| C | 3.1378396  | 9.0769204  | 7.7362642  |
| C | 2.6227409  | 12.1260394 | 8.1838506  |
| C | 5.3188613  | 10.7882382 | 9.0350002  |
| C | -1.7318528 | 13.0984202 | 13.2655092 |
| C | -3.1987688 | 10.7838730 | 11.9110331 |
| C | -2.3829938 | 10.6731774 | 15.0241377 |
| C | 6.7773738  | 4.7556383  | 13.1981940 |
| C | 5.4784516  | 4.0877738  | 15.2021860 |
| C | 7.3542368  | 5.6779324  | 15.4286271 |
| H | 4.0747881  | 8.4810484  | 15.7491077 |
| H | 5.7246165  | 8.0775624  | 16.2327566 |
| H | 4.3823744  | 6.9978466  | 16.6427729 |
| H | 6.2958007  | 7.5397509  | 12.1714863 |
| H | 7.0778471  | 8.1236218  | 13.6432005 |
| H | 5.6154310  | 8.9065947  | 13.0465778 |
| H | -1.8151154 | 6.5778592  | 10.2292016 |
| H | 0.9468660  | 5.2548895  | 7.5276239  |
| H | 2.2764084  | 4.5848371  | 8.4789511  |
| C | -1.7635425 | 3.5720223  | 10.7033201 |
| H | 0.1091026  | 1.5744416  | 10.5147591 |
| C | -0.6870631 | 3.1689596  | 8.5170085  |
| C | 0.5163147  | 2.5904836  | 10.6062619 |
| H | -1.3723462 | 6.4108682  | 8.5302679  |
| H | -0.5810500 | 7.6298099  | 9.5240931  |
| H | 2.0587031  | 6.3301727  | 8.3647648  |
| H | 2.6757364  | 1.7646690  | 14.8947253 |
| C | 4.2176337  | 0.4767376  | 12.8570492 |
| H | 4.9011546  | 2.4407549  | 12.1512418 |
| H | 3.6057136  | 1.7075459  | 11.1764950 |
| H | 1.2907179  | 1.6985031  | 13.7787185 |
| C | 2.8286416  | 0.1827707  | 13.4100536 |
| H | 2.8204646  | 4.3470313  | 15.6708793 |
| C | 1.9672299  | 5.1947199  | 17.4368120 |
| C | 0.8226327  | 7.2754001  | 17.1535428 |
| H | 0.7679139  | 8.0677119  | 15.1783569 |
| C | -1.7253347 | 4.0977481  | 14.6306570 |
| H | 0.3867293  | 3.8314429  | 14.4821804 |

|   |            |            |            |
|---|------------|------------|------------|
| H | -1.2480643 | 7.1650607  | 12.3597581 |
| C | -2.6370116 | 5.9705250  | 13.4546083 |
| H | 3.3058803  | 8.1982250  | 8.3752850  |
| C | 1.7189871  | 8.9797474  | 7.1761508  |
| C | 4.1329877  | 8.9859420  | 6.5771859  |
| C | 6.1027741  | 9.5548568  | 9.4867675  |
| C | 5.8167886  | 12.0360494 | 9.7635316  |
| H | 1.6137652  | 11.7939003 | 7.9011237  |
| C | 2.4437794  | 13.2745122 | 9.1758307  |
| C | 3.3063005  | 12.6223560 | 6.9104408  |
| H | 5.5567297  | 10.9369187 | 7.9712483  |
| H | -2.7345732 | 13.4682058 | 13.5210208 |
| C | -1.3646568 | 13.6680570 | 11.8969098 |
| C | -0.7676216 | 13.6163086 | 14.3302337 |
| C | -2.4936109 | 9.1702051  | 15.2564789 |
| H | -3.3704946 | 8.7538044  | 14.7549560 |
| C | -4.5075268 | 11.5595971 | 12.0687854 |
| H | -2.7374395 | 11.1479595 | 10.9831517 |
| C | -3.4912188 | 9.2998302  | 11.7169987 |
| H | -1.5440862 | 11.0363907 | 15.6335566 |
| C | -3.6313157 | 11.3809963 | 15.5527825 |
| H | 5.9955547  | 4.4990988  | 12.4757162 |
| H | 7.3894231  | 3.8588441  | 13.3623540 |
| H | 7.4184667  | 5.5052242  | 12.7290685 |
| H | 5.0645399  | 4.3747925  | 16.1721297 |
| H | 6.1822486  | 3.2629251  | 15.3788631 |
| H | 4.6652308  | 3.6956418  | 14.5850539 |
| H | 7.9216405  | 6.5132302  | 15.0106769 |
| H | 8.0553643  | 4.8437216  | 15.5602087 |
| H | 7.0068073  | 5.9725998  | 16.4218188 |
| H | -2.4919262 | 4.2497862  | 10.2512707 |
| H | -1.6669547 | 3.8389904  | 11.7561166 |
| H | -2.1894852 | 2.5609484  | 10.6563149 |
| H | -1.2121730 | 2.2051999  | 8.5101078  |
| H | 0.2362706  | 3.0444224  | 7.9475434  |
| H | -1.3181912 | 3.8831775  | 7.9800252  |
| H | 0.6487062  | 2.7944932  | 11.6718169 |
| H | 1.5040014  | 2.5925852  | 10.1336590 |
| H | 2.8301255  | -0.5409815 | 14.2253655 |
| H | 4.9448533  | 0.5653505  | 13.6681735 |
| H | 4.5732457  | -0.2803901 | 12.1578860 |
| H | 2.1754358  | -0.1940814 | 12.6191921 |
| H | 2.3025170  | 4.3804223  | 18.0699844 |
| C | 1.2486352  | 6.2487618  | 17.9816399 |

|   |            |            |            |
|---|------------|------------|------------|
| H | 0.2554013  | 8.1047837  | 17.5609258 |
| H | -1.8542191 | 3.2324160  | 15.2712678 |
| C | -2.8233414 | 4.8651306  | 14.2684447 |
| H | -3.4827187 | 6.5830394  | 13.1659973 |
| H | 1.4646015  | 9.8573073  | 6.5743082  |
| H | 0.9604425  | 8.8777839  | 7.9539656  |
| H | 1.6243232  | 8.1054957  | 6.5227974  |
| H | 3.9574350  | 8.0690021  | 6.0035785  |
| H | 5.1724306  | 8.9682221  | 6.9070575  |
| H | 4.0235233  | 9.8213045  | 5.8804334  |
| H | 5.4148544  | 12.9532743 | 9.3300403  |
| H | 6.9093556  | 12.0991987 | 9.7042181  |
| H | 5.7560657  | 8.6327510  | 9.0150493  |
| H | 7.1663965  | 9.6703954  | 9.2495404  |
| H | 6.0370183  | 9.4016643  | 10.5657524 |
| H | 5.5499054  | 12.0334875 | 10.8231017 |
| H | 3.4019987  | 13.6964165 | 9.4880307  |
| H | 1.9171061  | 12.9574295 | 10.0774920 |
| H | 1.8681732  | 14.0877914 | 8.7196503  |
| H | 3.3463981  | 11.8588391 | 6.1307375  |
| H | 4.3329905  | 12.9468247 | 7.1042098  |
| H | 2.7716887  | 13.4842500 | 6.4956592  |
| H | -0.3843078 | 13.3114991 | 11.5696210 |
| H | -1.3203056 | 14.7621695 | 11.9323424 |
| H | -2.0879297 | 13.3963248 | 11.1236846 |
| H | -1.0490688 | 13.2993661 | 15.3378857 |
| H | -0.7436867 | 14.7116646 | 14.3282093 |
| H | 0.2517783  | 13.2671145 | 14.1463265 |
| H | -4.5349414 | 11.0289009 | 15.0493405 |
| H | -2.6028681 | 8.9461255  | 16.3236176 |
| H | -1.6233234 | 8.6212688  | 14.8923335 |
| H | -5.0676406 | 11.2336888 | 12.9481808 |
| H | -5.1536839 | 11.3946034 | 11.1996080 |
| H | -4.3496839 | 12.6362246 | 12.1588038 |
| H | -2.5823971 | 8.7196753  | 11.5461412 |
| H | -4.1478767 | 9.1408404  | 10.8544699 |
| H | -3.9988766 | 8.8797444  | 12.5890206 |
| H | -3.5858711 | 12.4653056 | 15.4299957 |
| H | -3.7626420 | 11.1768432 | 16.6211202 |
| H | 1.0196813  | 6.2676859  | 19.0408043 |
| H | -3.8147040 | 4.6038300  | 14.6195692 |

**[Li(thf)( $\eta^5$ -L<sup>Pb</sup>)Er( $\eta^8$ -COT<sup>TIPS</sup>)] (8)**

|    |           |           |            |
|----|-----------|-----------|------------|
| Pb | 3.6334426 | 6.3346826 | 10.9929974 |
|----|-----------|-----------|------------|

|    |            |            |            |
|----|------------|------------|------------|
| Er | 1.7207071  | 8.4904844  | 12.3724043 |
| C  | 3.4519536  | 6.4980669  | 13.2857980 |
| C  | 1.3908609  | 5.9725580  | 11.4468209 |
| Li | 2.5675758  | 4.4582300  | 12.6869697 |
| C  | 2.1388842  | 6.2666830  | 13.7910137 |
| C  | 1.0699981  | 5.9928471  | 12.8422382 |
| C  | 2.5712934  | 10.1691306 | 10.6071198 |
| C  | 1.1591775  | 10.0864484 | 10.5048135 |
| C  | 0.0542908  | 10.1609305 | 11.3823009 |
| C  | -0.1607361 | 10.3218259 | 12.7736413 |
| C  | 0.7529642  | 10.3444921 | 13.8607829 |
| C  | 2.1487869  | 10.3498442 | 14.0210446 |
| C  | 3.2436807  | 10.3339079 | 13.1401442 |
| C  | 3.4108942  | 10.2734437 | 11.7441610 |
| Si | 5.0366554  | 6.8508225  | 14.2256743 |
| Si | 0.3514259  | 5.4828384  | 9.9617037  |
| O  | 2.9874582  | 2.5994091  | 13.0223198 |
| C  | 1.8225223  | 6.2637847  | 15.2567753 |
| C  | -0.2864479 | 5.6247717  | 13.3537307 |
| Si | 3.4210546  | 10.4811978 | 8.9265459  |
| H  | 0.8182725  | 9.9275259  | 9.4879019  |
| H  | -0.8716216 | 10.0518864 | 10.8272317 |
| Si | -1.8584127 | 11.0598602 | 13.2367559 |
| H  | 0.2578399  | 10.3531951 | 14.8261829 |
| H  | 2.4498614  | 10.3053096 | 15.0626032 |
| H  | 4.1876535  | 10.2961423 | 13.6711458 |
| H  | 4.4609063  | 10.2272122 | 11.4881033 |
| C  | 6.1764699  | 5.3029411  | 14.5110217 |
| C  | 4.7868778  | 7.7107421  | 15.8850735 |
| C  | 6.1109056  | 7.9905076  | 13.1750450 |
| C  | -0.4200544 | 3.7023060  | 9.9802730  |
| C  | -1.0393786 | 6.6873727  | 9.5355876  |
| C  | 1.4951145  | 5.5124768  | 8.4609881  |
| C  | 3.9689442  | 1.9288686  | 12.2114567 |
| C  | 2.3331391  | 1.6532072  | 13.8838942 |
| C  | 2.2815987  | 5.2353192  | 16.0777154 |
| C  | 1.0542798  | 7.2634617  | 15.8485130 |
| C  | -0.4673483 | 4.5024581  | 14.1653885 |
| C  | -1.4187069 | 6.3569830  | 13.0091206 |
| C  | 3.1553736  | 9.0493815  | 7.6740185  |
| C  | 2.5740955  | 12.0571616 | 8.2513504  |
| C  | 5.3091540  | 10.7493990 | 9.0318725  |
| C  | -1.6061369 | 12.9556777 | 13.2341003 |
| C  | -3.1774896 | 10.7111187 | 11.8964733 |

|   |            |            |            |
|---|------------|------------|------------|
| C | -2.3685512 | 10.5867754 | 15.0169951 |
| C | 6.7458179  | 4.8172660  | 13.1782874 |
| C | 5.4704958  | 4.1350431  | 15.1912378 |
| C | 7.3441060  | 5.7238925  | 15.4094091 |
| H | 4.0729752  | 8.5312195  | 15.7792967 |
| H | 5.7312084  | 8.1329319  | 16.2395498 |
| H | 4.3993641  | 7.0437737  | 16.6577167 |
| H | 6.2772312  | 7.5894385  | 12.1725247 |
| H | 7.0893088  | 8.1408817  | 13.6393626 |
| H | 5.6466224  | 8.9696892  | 13.0613925 |
| H | -1.8708964 | 6.6455719  | 10.2401049 |
| H | 0.9148785  | 5.3847687  | 7.5438441  |
| H | 2.2517417  | 4.7236278  | 8.4900336  |
| C | -1.7643581 | 3.6448856  | 10.7036401 |
| H | 0.1557723  | 1.6851662  | 10.5323353 |
| C | -0.6548001 | 3.2592037  | 8.5320549  |
| C | 0.5356263  | 2.7107127  | 10.6354715 |
| H | -1.4358764 | 6.4643981  | 8.5403477  |
| H | -0.6622305 | 7.7133306  | 9.5169742  |
| H | 2.0170542  | 6.4675174  | 8.3815353  |
| H | 2.6352635  | 1.8615090  | 14.9155095 |
| C | 4.1877872  | 0.5859424  | 12.8757631 |
| H | 4.8618988  | 2.5538992  | 12.1742463 |
| H | 3.5687974  | 1.8170557  | 11.1984591 |
| H | 1.2535887  | 1.7900191  | 13.7961377 |
| C | 2.8001586  | 0.2834657  | 13.4273927 |
| H | 2.8718295  | 4.4377089  | 15.6443206 |
| C | 1.9986587  | 5.2094046  | 17.4342411 |
| C | 0.7692724  | 7.2478065  | 17.2055852 |
| H | 0.6684326  | 8.0748605  | 15.2410408 |
| C | -1.7253624 | 4.1206140  | 14.6013297 |
| H | 0.3950346  | 3.9240222  | 14.4757497 |
| H | -1.3082644 | 7.2439805  | 12.3954932 |
| C | -2.6816631 | 5.9792920  | 13.4391202 |
| H | 3.2950948  | 8.1444078  | 8.2811455  |
| C | 1.7564954  | 8.9902446  | 7.0594448  |
| C | 4.1883581  | 8.9938025  | 6.5455428  |
| C | 6.1147309  | 9.5280438  | 9.4778852  |
| C | 5.7942656  | 12.0037513 | 9.7578788  |
| H | 1.5641157  | 11.7121717 | 7.9883586  |
| C | 2.4003829  | 13.1734817 | 9.2797135  |
| C | 3.2137597  | 12.5971819 | 6.9730543  |
| H | 5.5391950  | 10.9040168 | 7.9673131  |
| H | -2.5922984 | 13.3705910 | 13.4844158 |

|   |            |            |            |
|---|------------|------------|------------|
| C | -1.2138716 | 13.4954579 | 11.8604475 |
| C | -0.6227844 | 13.4467728 | 14.2941131 |
| C | -2.5632244 | 9.0958352  | 15.2681381 |
| H | -3.4598605 | 8.7218925  | 14.7679069 |
| C | -4.4328567 | 11.5738699 | 12.0383884 |
| H | -2.6874656 | 11.0319708 | 10.9671238 |
| C | -3.5719081 | 9.2493650  | 11.7169448 |
| H | -1.5093711 | 10.9088873 | 15.6212786 |
| C | -3.5720288 | 11.3723254 | 15.5396486 |
| H | 5.9576066  | 4.5684161  | 12.4601699 |
| H | 7.3555875  | 3.9169320  | 13.3308520 |
| H | 7.3859962  | 5.5673376  | 12.7090228 |
| H | 5.0715661  | 4.4130371  | 16.1699660 |
| H | 6.1792166  | 3.3109026  | 15.3506311 |
| H | 4.6495879  | 3.7451385  | 14.5833659 |
| H | 7.9120871  | 6.5585986  | 14.9916943 |
| H | 8.0426163  | 4.8860189  | 15.5310487 |
| H | 7.0059950  | 6.0145434  | 16.4069442 |
| H | -2.5015964 | 4.3046030  | 10.2395294 |
| H | -1.6872146 | 3.9181699  | 11.7560749 |
| H | -2.1675015 | 2.6245053  | 10.6556794 |
| H | -1.1615136 | 2.2856531  | 8.5227159  |
| H | 0.2769426  | 3.1503148  | 7.9733567  |
| H | -1.2932935 | 3.9594403  | 7.9855362  |
| H | 0.6411984  | 2.9117335  | 11.7045719 |
| H | 1.5316156  | 2.7394001  | 10.1813492 |
| H | 2.8050356  | -0.4415705 | 14.2415729 |
| H | 4.9144730  | 0.6767488  | 13.6871468 |
| H | 4.5478324  | -0.1674971 | 12.1748920 |
| H | 2.1495536  | -0.0958210 | 12.6355095 |
| H | 2.3699879  | 4.3942941  | 18.0459740 |
| C | 1.2424822  | 6.2211032  | 18.0077278 |
| H | 0.1704780  | 8.0432555  | 17.6351517 |
| H | -1.8333697 | 3.2431012  | 15.2291398 |
| C | -2.8428300 | 4.8568828  | 14.2353524 |
| H | -3.5430645 | 6.5689243  | 13.1491651 |
| H | 1.5341265  | 9.8927735  | 6.4827383  |
| H | 0.9664567  | 8.8672765  | 7.8019267  |
| H | 1.6781204  | 8.1421538  | 6.3704042  |
| H | 4.0095941  | 8.1133612  | 5.9182950  |
| H | 5.2146598  | 8.9302083  | 6.9087347  |
| H | 4.1248693  | 9.8673986  | 5.8910904  |
| H | 5.3798200  | 12.9154245 | 9.3247713  |
| H | 6.8857462  | 12.0793187 | 9.6929207  |

|   |            |            |            |
|---|------------|------------|------------|
| H | 5.7757625  | 8.5996035  | 9.0128965  |
| H | 7.1742675  | 9.6571525  | 9.2296405  |
| H | 6.0608312  | 9.3782479  | 10.5579364 |
| H | 5.5329302  | 12.0002713 | 10.8187567 |
| H | 3.3572041  | 13.6130811 | 9.5707297  |
| H | 1.9136841  | 12.8171798 | 10.1892277 |
| H | 1.7873054  | 13.9824071 | 8.8667861  |
| H | 3.2417230  | 11.8540395 | 6.1730051  |
| H | 4.2410009  | 12.9321592 | 7.1452880  |
| H | 2.6548464  | 13.4609490 | 6.5959439  |
| H | -0.2506914 | 13.0920732 | 11.5372376 |
| H | -1.1197947 | 14.5867646 | 11.8850302 |
| H | -1.9481088 | 13.2494237 | 11.0890022 |
| H | -0.9100356 | 13.1422557 | 15.3040237 |
| H | -0.5655346 | 14.5409578 | 14.2882655 |
| H | 0.3847621  | 13.0663188 | 14.1078909 |
| H | -4.4951650 | 11.0741551 | 15.0367945 |
| H | -2.6892478 | 8.8932751  | 16.3377692 |
| H | -1.7237679 | 8.4950876  | 14.9145837 |
| H | -5.0154569 | 11.2977590 | 12.9204089 |
| H | -5.0855608 | 11.4378068 | 11.1690555 |
| H | -4.2063762 | 12.6391818 | 12.1128524 |
| H | -2.7078891 | 8.6061920  | 11.5434693 |
| H | -4.2440134 | 9.1310556  | 10.8597514 |
| H | -4.1017847 | 8.8710379  | 12.5948543 |
| H | -3.4595606 | 12.4511564 | 15.4122379 |
| H | -3.7161005 | 11.1813342 | 16.6088091 |
| H | 1.0201854  | 6.2065967  | 19.0684166 |
| H | -3.8295839 | 4.5595464  | 14.5705802 |

**Cp<sup>-</sup>**

|   |            |            |            |
|---|------------|------------|------------|
| C | 0.0055900  | 1.1971500  | 0.0000100  |
| C | 1.1402800  | 0.3646300  | -0.0000000 |
| C | -1.1368100 | 0.3752500  | -0.0000000 |
| C | 0.6991400  | -0.9717800 | 0.0000100  |
| C | -0.7081800 | -0.9652300 | -0.0000100 |
| H | 2.1743400  | 0.6953000  | -0.0003700 |
| H | -2.1677700 | 0.7155400  | -0.0000700 |
| H | 1.3331700  | -1.8530600 | 0.0002700  |
| H | -1.3504000 | -1.8405700 | -0.0001600 |
| H | 0.0106600  | 2.2828000  | 0.0002000  |

**[( $\eta^5$ -Cp)La( $\eta^8$ -COT<sup>TIPS</sup>)]**

|    |           |           |            |
|----|-----------|-----------|------------|
| La | 0.0302200 | 0.0067400 | -2.5713400 |
|----|-----------|-----------|------------|



|    |            |            |            |
|----|------------|------------|------------|
| C  | 1.1399500  | 0.4506200  | 0.0156700  |
| C  | -0.5870200 | -1.0415800 | -0.0172100 |
| C  | -0.0670500 | 1.1807700  | 0.0198800  |
| C  | -1.1344200 | 0.2592100  | 0.0006600  |
| C  | 1.1832500  | -1.3708900 | -4.6286700 |
| C  | -0.2174600 | -1.4190800 | -4.8623200 |
| C  | -1.3076100 | -0.5203000 | -4.8672100 |
| C  | -1.5266800 | 0.8654500  | -4.6374800 |
| C  | -0.6067400 | 1.9117200  | -4.3666300 |
| C  | 0.7885300  | 2.0166400  | -4.1993900 |
| C  | 1.8758000  | 1.1180100  | -4.1911900 |
| C  | 2.0356500  | -0.2729000 | -4.3522100 |
| Si | 2.0163600  | -3.0777900 | -4.6963800 |
| H  | -0.5760500 | -2.4303100 | -5.0352300 |
| H  | -2.2301400 | -1.0669100 | -5.0360100 |
| Si | -3.3406300 | 1.3947800  | -4.8562100 |
| H  | -1.0809700 | 2.8734600  | -4.2080600 |
| H  | 1.0955100  | 3.0288400  | -3.9547100 |
| H  | 2.8103100  | 1.6115900  | -3.9425900 |
| H  | 3.0652900  | -0.5629900 | -4.1859000 |
| C  | 1.6139000  | -4.0384000 | -3.0842200 |
| C  | 1.3295500  | -4.0179000 | -6.2167600 |
| C  | 3.9226700  | -3.0120900 | -4.8094500 |
| C  | -3.6610000 | 1.6586600  | -6.7173800 |
| C  | -4.5013800 | -0.0050400 | -4.2579900 |
| C  | -3.6542200 | 3.0682900  | -3.9857600 |
| H  | 1.9878500  | -3.3645900 | -2.2982200 |
| C  | 0.1242500  | -4.2534000 | -2.8252800 |
| C  | 2.3488400  | -5.3700400 | -2.9264200 |
| C  | 4.6606300  | -2.6137600 | -3.5298700 |
| C  | 4.4735400  | -2.2499600 | -6.0145900 |
| H  | 0.3364400  | -4.3696400 | -5.9017700 |
| C  | 1.1285000  | -3.1497700 | -7.4592600 |
| C  | 2.1485300  | -5.2575200 | -6.5816500 |
| H  | 4.1565400  | -4.0737000 | -4.9777800 |
| H  | -4.7094100 | 1.9762200  | -6.8013500 |
| C  | -3.4938700 | 0.3864200  | -7.5451800 |
| C  | -2.7857600 | 2.7754700  | -7.2846600 |
| C  | -3.5456600 | 3.0226800  | -2.4630800 |
| H  | -4.3832600 | 2.4760700  | -2.0218800 |
| C  | -5.9846800 | 0.3317900  | -4.4180100 |
| H  | -4.2955500 | -0.8326200 | -4.9505500 |
| C  | -4.2308300 | -0.5249000 | -2.8484000 |
| H  | -2.8436000 | 3.7132100  | -4.3508000 |

|   |            |            |            |
|---|------------|------------|------------|
| C | -4.9566100 | 3.7537100  | -4.4027600 |
| H | -0.3199800 | -4.9134100 | -3.5768700 |
| H | -0.4470400 | -3.3218300 | -2.8396400 |
| H | -0.0371000 | -4.7248500 | -1.8495300 |
| H | 2.2151200  | -5.7660400 | -1.9136900 |
| H | 3.4227100  | -5.2897900 | -3.1072400 |
| H | 1.9540300  | -6.1230400 | -3.6133800 |
| H | 4.0789600  | -2.6330300 | -6.9575600 |
| H | 5.5648800  | -2.3377700 | -6.0577900 |
| H | 4.3204500  | -3.1763700 | -2.6577300 |
| H | 5.7350200  | -2.7980100 | -3.6386500 |
| H | 4.5469700  | -1.5526300 | -3.2942600 |
| H | 4.2333800  | -1.1847500 | -5.9734400 |
| H | 2.0821600  | -2.7939100 | -7.8575500 |
| H | 0.5128900  | -2.2718200 | -7.2592000 |
| H | 0.6448800  | -3.7277600 | -8.2545200 |
| H | 2.2857700  | -5.9419100 | -5.7424900 |
| H | 3.1425100  | -4.9827200 | -6.9463000 |
| H | 1.6582100  | -5.8175200 | -7.3852700 |
| H | -2.4697200 | 0.0075300  | -7.4860100 |
| H | -3.7080800 | 0.5818000  | -8.6016000 |
| H | -4.1640500 | -0.4140700 | -7.2212600 |
| H | -2.9422100 | 3.7294100  | -6.7743800 |
| H | -2.9985800 | 2.9349500  | -8.3473400 |
| H | -1.7243900 | 2.5256700  | -7.1978200 |
| H | -5.8355900 | 3.1999700  | -4.0659500 |
| H | -3.5661100 | 4.0329200  | -2.0398100 |
| H | -2.6225700 | 2.5443200  | -2.1238500 |
| H | -6.3031800 | 1.0856100  | -3.6936400 |
| H | -6.6024100 | -0.5562300 | -4.2458700 |
| H | -6.2241900 | 0.7093700  | -5.4149500 |
| H | -3.1953900 | -0.8547800 | -2.7248400 |
| H | -4.8721200 | -1.3834800 | -2.6202900 |
| H | -4.4298600 | 0.2354400  | -2.0896600 |
| H | -5.0371900 | 3.8710000  | -5.4853900 |
| H | -5.0187100 | 4.7538600  | -3.9600300 |
| H | -2.1875900 | 0.5052400  | 0.0282200  |
| H | -0.1579100 | 2.2579500  | 0.0607200  |
| C | 0.8191900  | -0.9223800 | -0.0057000 |
| H | -1.1467900 | -1.9675800 | 0.0008200  |
| H | 2.1364000  | 0.8698000  | 0.0521800  |
| H | 1.5261600  | -1.7409800 | 0.0186400  |

## References

1. S. M. Cendrowski-Guillaume, G. Le Gland, M. Nierlich and M. Ephritikhine, *Organometallics*, 2000, **19**, 5654-5660.
2. M. Saito, M. Nakada, T. Kuwabara and M. Minoura, *Chem. Commun.*, 2015, **51**, 4674-4676.
3. O. T. Summerscales, F. G. N. Cloke, P. B. Hitchcock, J. C. Green and N. Hazari, *Science*, 2006, **311**, 829-831.
4. G. Sheldrick, *Acta Cryst. A*, 2015, **71**, 3-8.
5. G. Sheldrick, *Acta Cryst. C*, 2015, **71**, 3-8.
6. O. V. Dolomanov, L. J. Bourhis, R. J. Gildea, J. A. K. Howard and H. Puschmann, *J. Appl. Crystallogr.*, 2009, **42**, 339-341.
7. F. Aquilante, J. Autschbach, R. K. Carlson, L. F. Chibotaru, M. G. Delcey, L. De Vico, I. Fdez. Galván, N. Ferré, L. M. Frutos, L. Gagliardi, M. Garavelli, A. Giussani, C. E. Hoyer, G. Li Manni, H. Lischka, D. Ma, P. Å. Malmqvist, T. Müller, A. Nenov, M. Olivucci, T. B. Pedersen, D. Peng, F. Plasser, B. Pritchard, M. Reiher, I. Rivalta, I. Schapiro, J. Segarra-Martí, M. Stenrup, D. G. Truhlar, L. Ungur, A. Valentini, S. Vancoillie, V. Veryazov, V. P. Vysotskiy, O. Weingart, F. Zapata and R. Lindh, *J. Comput. Chem.*, 2016, **37**, 506-541.
8. J. P. Perdew, M. Ernzerhof and K. Burke, *J. Chem. Phys.*, 1996, **105**, 9982-9985.
9. F. Weigend and R. Ahlrichs, *Phys. Chem. Chem. Phys.*, 2005, **7**, 3297-3305.
10. B. Metz, H. Stoll and M. Dolg, *J. Chem. Phys.*, 2000, **113**, 2563-2569.
11. M. Dolg, H. Stoll, A. Savin and H. Preuss, *Theor. Chim. Acta*, 1989, **75**, 173-194.
12. F. Weigend, *Phys. Chem. Chem. Phys.*, 2006, **8**, 1057-1065.
13. O. Treutler and R. Ahlrichs, *J. Chem. Phys.*, 1995, **102**, 346-354.
14. R. S. Mulliken, *J. Chem. Phys.*, 1955, **23**, 1833-1840.
15. J. Jusélius, D. Sundholm and J. Gauss, *J. Chem. Phys.*, 2004, **121**, 3952-3963.
16. H. Fliegl, S. Taubert, O. Lehtonen and D. Sundholm, *Phys. Chem. Chem. Phys.*, 2011, **13**, 20500-20518.
17. S. Taubert, D. Sundholm and J. Jusélius, *J. Chem. Phys.*, 2011, **134**, 054123.
18. A. Schäfer, A. Klamt, D. Sattel, J. C. W. Lohrenz and F. Eckert, *Phys. Chem. Chem. Phys.*, 2000, **2**, 2187-2193.
